# Supplementary material for: “Like–like” tetrel bonding interactions between Sn centres: a combinedab initioand CSD study
Source: Royal Society of Chemistry journal article supplement (doi:10.1039/c9dt01953g), 2019-01-01
Supplement: c9dt01953g1.pdf [file c9dt01953g1.pdf]

**Supporting information for manuscript**

**“Like-like” tetrel bonding interactions between Sn centres: a  
combined *ab initio* and CSD study**

by Antonio Franconetti\*<sup>a</sup> and Antonio Frontera\*<sup>a</sup>

**Table of contents:**

- 1. Table S1**
- 2. Figures S1 to S4**
- 3. Cartesian coordinates**

## 1. Table S1

| Type I refcodes   |          |        |          |
|-------------------|----------|--------|----------|
| AFAJAU            | AFAJEU   | AGEBUJ | BAVSIC   |
| BELKEK            | CUGRAX   | FIWFEW | GUJCIZ   |
| HUCGUH            | KAJVEX   | NENWIN | OFIYEH   |
| OFIYIL            | OFIYAD   | OFIYOR | OFIYUX   |
| OFIZIM            | OFIZUY   | OMDTSN | OMIVAI   |
| OMIVEM            | SOQREW   | TAXHOQ | TUBKAC   |
| VAPMEE            | VAYVEY   | VAYVIC | XEXSUP   |
| YERBED            | YIJLUY   | WIBPOP | GAYRAC   |
| SANHIZ            |          |        |          |
| Type II refcodes  |          |        |          |
| BAMWOE            | CUMGUO   | DMSNCL | DMSNCL01 |
| DMSNCL01          | DMSNCL03 | DORZER | DPPRSN   |
| FEDYES            | FEDIW    | FUXGIO | GUXTUP01 |
| ICULAW            | IHOROM   | JERTIK | JERTIK01 |
| JERTOK            | KEJLOA   | KEJLUG | MELPAU   |
| MOVJUC            | MOVKEN   | MOVKIR | MXSNOX   |
| OLAGIT            | QUVROK   | SEFDUE | SIHQIJ   |
| SISKEM            | TAKHOQ   | UYOBIU | UZAJEM   |
| VOLDUX            | VURFUJ   | WIDCAN | YICPAD   |
| YICPOR            | YICPUX   | YICQAE | LEMHET   |
| LEMHIX            | YICQAE01 | REGGAM | GAYRAC   |
| SANHIZ            |          |        |          |
| Type III refcodes |          |        |          |
| DINWEE            | FILJOZ   | OFIXIK | OFIXOQ   |
| OFIXUW            | OFIZEI   | PIGSII |          |

## 2. Figures S1 to S4

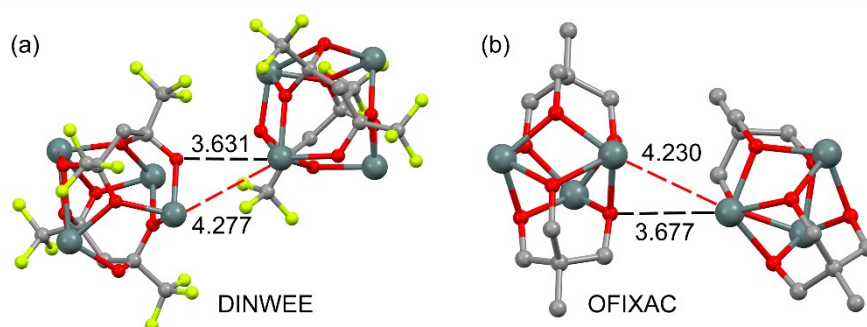

**Fig S1.** (a) X-ray structure of refcode DINWEE. (b) X-ray structure of refcode OFIXAC.

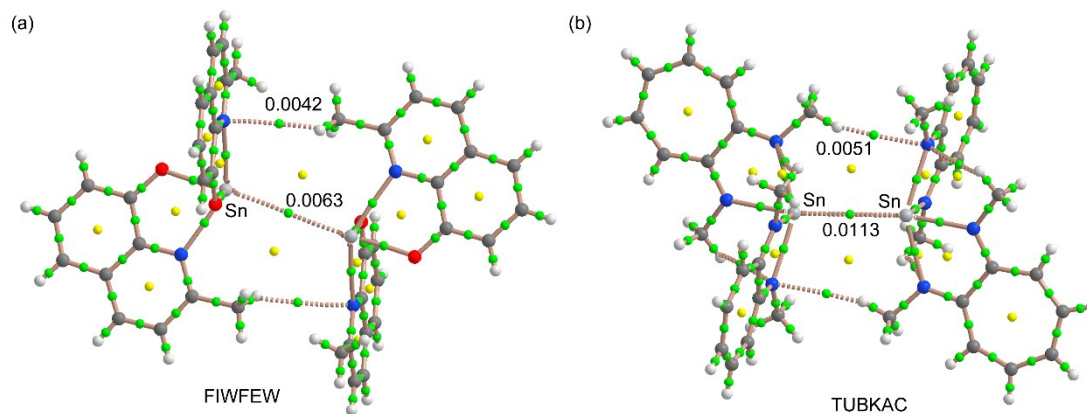

**Fig S2.** Distribution of bond and ring critical points (green and yellow spheres, respectively) and bond paths for X-ray structures FIWFEW (a) and TUBKAC (b). The values of  $\rho(r)$  at the bond CPs are given in atomic units.

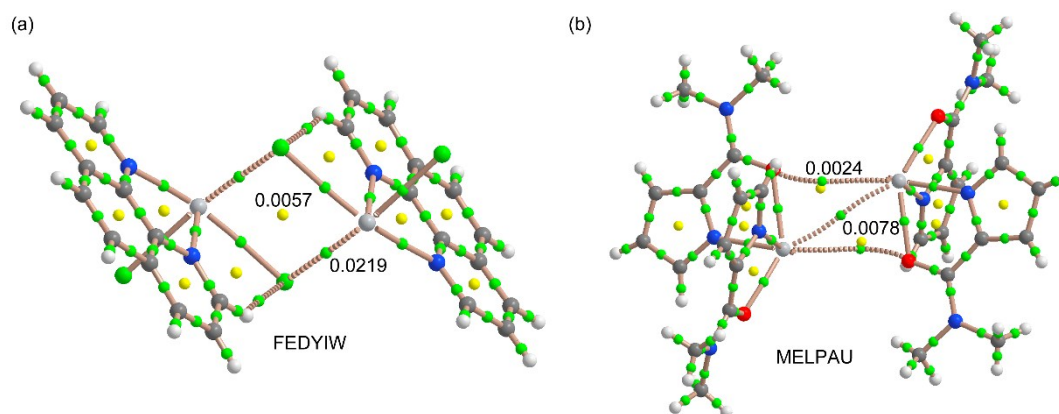

**Fig S3.** Distribution of bond and ring critical points (green and yellow spheres, respectively) and bond paths for X-ray structures FEDYIW (a) and MELPAU (b). The values of  $\rho(r)$  at the bond CPs are given in atomic units.

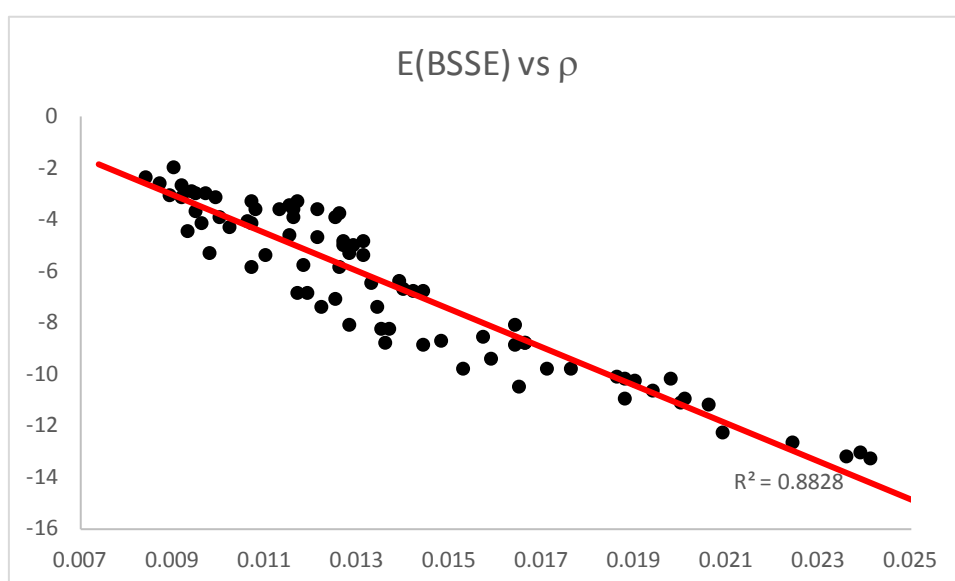

**Fig. S4.** Linear regression plot of interaction energy (kcal/mol) vs  $\rho(r)$  in a.u. for complexes 19-99.

### 3. Cartesian coordinates

#### *Complex 19 (X=H, Y=H)*

|    |            |            |            |
|----|------------|------------|------------|
| C  | 6.6337556  | -0.0438710 | 0.0000000  |
| C  | 5.9318013  | -0.0370377 | 1.2040549  |
| C  | 4.5363775  | -0.0189337 | 1.1964699  |
| C  | 3.8061118  | -0.0076874 | 0.0000000  |
| C  | 4.5363775  | -0.0189337 | -1.1964699 |
| C  | 5.9318013  | -0.0370377 | -1.2040549 |
| H  | 6.4708409  | -0.0466333 | 2.1465128  |
| H  | 4.0098452  | -0.0218433 | 2.1483045  |
| H  | 4.0098452  | -0.0218433 | -2.1483045 |
| H  | 6.4708409  | -0.0466333 | -2.1465128 |
| Sn | 1.6351942  | 0.0529075  | 0.0000000  |
| H  | 1.2603788  | -0.7402854 | 1.4374695  |
| H  | 1.2783035  | 1.6995457  | 0.0000000  |
| H  | 1.2603788  | -0.7402854 | -1.4374695 |
| H  | 7.7187213  | -0.0594109 | 0.0000000  |
| Sn | -2.0189715 | 0.0031248  | 0.0000000  |
| C  | -3.4625522 | -0.0034702 | 1.5275416  |
| C  | -4.8272324 | -0.0336971 | 1.2539259  |
| H  | -5.5100755 | -0.0589737 | 2.1142222  |
| C  | -5.4539220 | -0.0451243 | 0.0000000  |
| H  | -6.5417413 | -0.0854282 | 0.0000000  |
| C  | -4.8272324 | -0.0336971 | -1.2539259 |
| H  | -5.5100755 | -0.0589737 | -2.1142222 |
| C  | -3.4625522 | -0.0034702 | -1.5275416 |
| C  | -3.0616876 | 0.0381727  | -2.9867131 |
| H  | -3.7020178 | -0.6096064 | -3.6003898 |
| H  | -3.1487487 | 1.0529244  | -3.3946090 |
| H  | -2.0256555 | -0.2776444 | -3.1370743 |

|   |            |            |           |
|---|------------|------------|-----------|
| C | -3.0616876 | 0.0381727  | 2.9867131 |
| H | -3.1487487 | 1.0529244  | 3.3946090 |
| H | -3.7020178 | -0.6096064 | 3.6003898 |
| H | -2.0256555 | -0.2776444 | 3.1370743 |

**Complex 20** (X=H, Y=F)

|    |            |            |            |
|----|------------|------------|------------|
| C  | 6.5668286  | -0.0405218 | 0.0000000  |
| C  | 5.8967444  | -0.0351485 | 1.2116470  |
| C  | 4.5006135  | -0.0210540 | 1.1949979  |
| C  | 3.7684661  | -0.0135209 | 0.0000000  |
| C  | 4.5006135  | -0.0210540 | -1.1949979 |
| C  | 5.8967444  | -0.0351485 | -1.2116470 |
| H  | 6.4611710  | -0.0431653 | 2.1373684  |
| H  | 3.9782431  | -0.0235213 | 2.1487160  |
| H  | 3.9782431  | -0.0235213 | -2.1487160 |
| H  | 6.4611710  | -0.0431653 | -2.1373684 |
| Sn | 1.5918220  | 0.0387705  | 0.0000000  |
| H  | 1.2415529  | -0.7587573 | 1.4415944  |
| H  | 1.2508118  | 1.6874116  | 0.0000000  |
| H  | 1.2415529  | -0.7587573 | -1.4415944 |
| F  | 7.9223551  | -0.0566629 | 0.0000000  |
| Sn | -2.0086115 | 0.0208992  | 0.0000000  |
| C  | -3.4488760 | 0.0025574  | 1.5285377  |
| C  | -4.8131726 | -0.0370575 | 1.2540995  |
| H  | -5.4959824 | -0.0670003 | 2.1141228  |
| C  | -5.4392928 | -0.0528073 | 0.0000000  |
| H  | -6.5268011 | -0.0996201 | 0.0000000  |
| C  | -4.8131726 | -0.0370575 | -1.2540995 |
| H  | -5.4959824 | -0.0670003 | -2.1141228 |
| C  | -3.4488760 | 0.0025574  | -1.5285377 |
| C  | -3.0478666 | 0.0469714  | -2.9874819 |

H -3.6840206 -0.6045867 -3.6013643  
H -3.1412085 1.0612564 -3.3949798  
H -2.0099873 -0.2624684 -3.1377918  
C -3.0478666 0.0469714 2.9874819  
H -3.1412085 1.0612564 3.3949798  
H -3.6840206 -0.6045867 3.6013643  
H -2.0099873 -0.2624684 3.1377918

**Complex 21** ( $X=H$ ,  $Y=CF_3$ )

C 5.8031056 0.0177595 0.0000000  
C 5.1082004 0.0111516 1.2085207  
C 3.7144848 0.0078417 1.1943889  
C 2.9810096 0.0070200 0.0000000  
C 3.7144848 0.0078417 -1.1943889  
C 5.1082004 0.0111516 -1.2085207  
H 5.6519202 0.0151450 2.1467595  
H 3.1907301 -0.0010606 2.1475839  
H 3.1907301 -0.0010606 -2.1475839  
H 5.6519202 0.0151450 -2.1467595  
Sn 0.7904197 0.0439131 0.0000000  
H 0.4889895 -0.7570257 1.4513186  
H 0.4811261 1.6991394 0.0000000  
H 0.4889895 -0.7570257 -1.4513186  
C 7.2951291 -0.0352804 0.0000000  
F 7.7587222 -1.3044457 0.0000000  
F 7.8315908 0.5603616 1.0804409  
F 7.8315908 0.5603616 -1.0804409  
Sn -2.7106365 -0.0011863 0.0000000  
C -4.1444333 -0.0160795 1.5303378  
C -5.5083977 -0.0571947 1.2543971  
H -6.1914145 -0.0852045 2.1140026

|   |            |            |            |
|---|------------|------------|------------|
| C | -6.1337206 | -0.0748625 | 0.0000000  |
| H | -7.2211035 | -0.1216867 | 0.0000000  |
| C | -5.5083977 | -0.0571947 | -1.2543971 |
| H | -6.1914145 | -0.0852045 | -2.1140026 |
| C | -4.1444333 | -0.0160795 | -1.5303378 |
| C | -3.7429273 | 0.0364833  | -2.9885676 |
| H | -4.3746897 | -0.6162745 | -3.6053207 |
| H | -3.8429991 | 1.0520964  | -3.3908254 |
| H | -2.7030800 | -0.2654255 | -3.1400697 |
| C | -3.7429273 | 0.0364833  | 2.9885676  |
| H | -3.8429991 | 1.0520964  | 3.3908254  |
| H | -4.3746897 | -0.6162745 | 3.6053207  |
| H | -2.7030800 | -0.2654255 | 3.1400697  |

**Complex 22 (X=H, Y=CN)**

|    |           |            |            |
|----|-----------|------------|------------|
| C  | 6.2275282 | -0.0194016 | 0.0000000  |
| C  | 5.5290305 | -0.0188455 | 1.2131186  |
| C  | 4.1365824 | -0.0109408 | 1.1951945  |
| C  | 3.4031575 | -0.0040297 | 0.0000000  |
| C  | 4.1365824 | -0.0109408 | -1.1951945 |
| C  | 5.5290305 | -0.0188455 | -1.2131186 |
| H  | 6.0795536 | -0.0251182 | 2.1480957  |
| H  | 3.6110340 | -0.0186803 | 2.1476358  |
| H  | 3.6110340 | -0.0186803 | -2.1476358 |
| H  | 6.0795536 | -0.0251182 | -2.1480957 |
| Sn | 1.2040933 | 0.0517177  | 0.0000000  |
| H  | 0.9267907 | -0.7480671 | 1.4579605  |
| H  | 0.9374920 | 1.7153199  | 0.0000000  |
| H  | 0.9267907 | -0.7480671 | -1.4579605 |
| C  | 7.6579159 | -0.0249457 | 0.0000000  |
| N  | 8.8312702 | -0.0277154 | 0.0000000  |

|    |            |            |            |
|----|------------|------------|------------|
| Sn | -2.2307776 | 0.0201893  | 0.0000000  |
| C  | -3.6589643 | -0.0066935 | 1.5323285  |
| C  | -5.0223225 | -0.0547599 | 1.2547127  |
| H  | -5.7054322 | -0.0887704 | 2.1136883  |
| C  | -5.6468350 | -0.0745586 | 0.0000000  |
| H  | -6.7338212 | -0.1278951 | 0.0000000  |
| C  | -5.0223225 | -0.0547599 | -1.2547127 |
| H  | -5.7054322 | -0.0887704 | -2.1136883 |
| C  | -3.6589643 | -0.0066935 | -1.5323285 |
| C  | -3.2572192 | 0.0405804  | -2.9905735 |
| H  | -3.8887382 | -0.6154724 | -3.6038430 |
| H  | -3.3579301 | 1.0541427  | -3.3975945 |
| H  | -2.2173963 | -0.2617154 | -3.1408967 |
| C  | -3.2572192 | 0.0405804  | 2.9905735  |
| H  | -3.3579301 | 1.0541427  | 3.3975945  |
| H  | -3.8887382 | -0.6154724 | 3.6038430  |
| H  | -2.2173963 | -0.2617154 | 3.1408967  |

**Complex 23** ( $X=H$ ,  $Y=P(CN)_2$ )

|    |           |            |            |
|----|-----------|------------|------------|
| C  | 5.4651521 | -0.3933191 | 0.0000000  |
| C  | 4.7697341 | -0.3554236 | 1.2118136  |
| C  | 3.3781719 | -0.2585762 | 1.1934502  |
| C  | 2.6447939 | -0.2096298 | 0.0000000  |
| C  | 3.3781719 | -0.2585762 | -1.1934502 |
| C  | 4.7697341 | -0.3554236 | -1.2118136 |
| H  | 5.3039193 | -0.3835248 | 2.1576278  |
| H  | 2.8560292 | -0.2260653 | 2.1476247  |
| H  | 2.8560292 | -0.2260653 | -2.1476247 |
| H  | 5.3039193 | -0.3835248 | -2.1576278 |
| Sn | 0.4438224 | -0.0437716 | 0.0000000  |
| P  | 7.2516733 | -0.7304530 | 0.0000000  |



|    |            |            |            |
|----|------------|------------|------------|
| C  | 7.7842684  | 0.3339526  | 1.3289196  |
| N  | 8.1727033  | 0.9121428  | 2.2759944  |
| C  | 7.7842684  | 0.3339526  | -1.3289196 |
| N  | 8.1727033  | 0.9121428  | -2.2759944 |
| H  | 0.1556603  | -0.8315269 | 1.4633700  |
| H  | 0.2714386  | 1.6322859  | 0.0000000  |
| H  | 0.1556603  | -0.8315269 | -1.4633700 |
| Sn | -2.9450826 | 0.0509121  | 0.0000000  |
| C  | -4.3703016 | 0.0673059  | 1.5331099  |
| C  | -5.7344404 | 0.0708731  | 1.2547387  |
| H  | -6.4182678 | 0.0586943  | 2.1136002  |
| C  | -6.3589182 | 0.0772906  | 0.0000000  |
| H  | -7.4471739 | 0.0666330  | 0.0000000  |
| C  | -5.7344404 | 0.0708731  | -1.2547387 |
| H  | -6.4182678 | 0.0586943  | -2.1136002 |
| C  | -4.3703016 | 0.0673059  | -1.5331099 |
| C  | -3.9672704 | 0.0884446  | -2.9914519 |
| H  | -4.6284466 | -0.5421851 | -3.5999578 |
| H  | -4.0220688 | 1.1028912  | -3.4046446 |
| H  | -2.9425435 | -0.2619768 | -3.1403276 |
| C  | -3.9672704 | 0.0884446  | 2.9914519  |
| H  | -4.0220688 | 1.1028912  | 3.4046446  |
| H  | -4.6284466 | -0.5421851 | 3.5999578  |
| H  | -2.9425435 | -0.2619768 | 3.1403276  |

**Complex 24** (X=H, Y=SO<sub>2</sub>CN)

|   |           |           |            |
|---|-----------|-----------|------------|
| C | 5.4349780 | 0.2938373 | 0.0000000  |
| C | 4.7594307 | 0.2495725 | 1.2208430  |
| C | 3.3684388 | 0.1756077 | 1.1965064  |
| C | 2.6369122 | 0.1396895 | 0.0000000  |
| C | 3.3684388 | 0.1756077 | -1.1965064 |

|    |            |            |            |
|----|------------|------------|------------|
| C  | 4.7594307  | 0.2495725  | -1.2208430 |
| H  | 5.3156673  | 0.2888918  | 2.1507724  |
| H  | 2.8411327  | 0.1421224  | 2.1476268  |
| H  | 2.8411327  | 0.1421224  | -2.1476268 |
| H  | 5.3156673  | 0.2888918  | -2.1507724 |
| Sn | 0.4141398  | 0.1146564  | 0.0000000  |
| S  | 7.1667112  | 0.3780519  | 0.0000000  |
| O  | 7.6505319  | 0.8818272  | 1.2532185  |
| O  | 7.6505319  | 0.8818272  | -1.2532185 |
| C  | 7.5840250  | -1.3348047 | 0.0000000  |
| N  | 7.8912738  | -2.4694954 | 0.0000000  |
| H  | 0.2334865  | -0.6909608 | 1.4729580  |
| H  | 0.1706085  | 1.7838041  | 0.0000000  |
| H  | 0.2334865  | -0.6909608 | -1.4729580 |
| Sn | -2.8802258 | -0.0030217 | 0.0000000  |
| C  | -4.2958138 | -0.0566350 | 1.5354415  |
| C  | -5.6576466 | -0.1296814 | 1.2552672  |
| H  | -6.3403640 | -0.1751812 | 2.1135383  |
| C  | -6.2804494 | -0.1611336 | 0.0000000  |
| H  | -7.3662246 | -0.2337550 | 0.0000000  |
| C  | -5.6576466 | -0.1296814 | -1.2552672 |
| H  | -6.3403640 | -0.1751812 | -2.1135383 |
| C  | -4.2958138 | -0.0566350 | -1.5354415 |
| C  | -3.8922468 | -0.0004264 | -2.9923640 |
| H  | -4.5094530 | -0.6684236 | -3.6067232 |
| H  | -4.0124582 | 1.0113045  | -3.3979638 |
| H  | -2.8465799 | -0.2819322 | -3.1411438 |
| C  | -3.8922468 | -0.0004264 | 2.9923640  |
| H  | -4.0124582 | 1.0113045  | 3.3979638  |
| H  | -4.5094530 | -0.6684236 | 3.6067232  |
| H  | -2.8465799 | -0.2819322 | 3.1411438  |

**Complex 25** (X=H, Y=tBu)

|    |            |            |            |
|----|------------|------------|------------|
| C  | 4.2464519  | 0.0413754  | 0.0000000  |
| C  | 3.5157671  | 0.0210183  | 1.1947352  |
| C  | 2.1208103  | -0.0018138 | 1.1898060  |
| C  | 1.3826768  | -0.0083769 | 0.0000000  |
| C  | 2.1208103  | -0.0018138 | -1.1898060 |
| C  | 3.5157671  | 0.0210183  | -1.1947352 |
| H  | 4.0306956  | 0.0251530  | 2.1491995  |
| H  | 1.6028898  | -0.0182986 | 2.1466968  |
| H  | 1.6028898  | -0.0182986 | -2.1466968 |
| H  | 4.0306956  | 0.0251530  | -2.1491995 |
| Sn | -0.7871807 | 0.0310878  | 0.0000000  |
| H  | -1.1563702 | -0.7663769 | 1.4368485  |
| H  | -1.1492217 | 1.6756100  | 0.0000000  |
| H  | -1.1563702 | -0.7663769 | -1.4368485 |
| C  | 5.7685910  | 0.0064019  | 0.0000000  |
| C  | 6.3469493  | 0.7002960  | 1.2350612  |
| H  | 6.0898223  | 0.1783039  | 2.1578569  |
| H  | 7.4382990  | 0.7229008  | 1.1668005  |
| H  | 5.9853481  | 1.7287205  | 1.3124927  |
| C  | 6.3469493  | 0.7002960  | -1.2350612 |
| H  | 7.4382990  | 0.7229008  | -1.1668005 |
| H  | 6.0898223  | 0.1783039  | -2.1578569 |
| H  | 5.9853481  | 1.7287205  | -1.3124927 |
| C  | 6.2174618  | -1.4597911 | 0.0000000  |
| H  | 5.8354346  | -1.9774280 | -0.8834078 |
| H  | 7.3104133  | -1.5309099 | 0.0000000  |
| H  | 5.8354346  | -1.9774280 | 0.8834078  |
| Sn | -4.4380481 | 0.0203128  | 0.0000000  |
| C  | -5.8813662 | -0.0023331 | 1.5275505  |
| C  | -7.2456359 | -0.0484532 | 1.2539566  |

|   |            |            |            |
|---|------------|------------|------------|
| H | -7.9280730 | -0.0825108 | 2.1142803  |
| C | -7.8720437 | -0.0673479 | 0.0000000  |
| H | -8.9593263 | -0.1206503 | 0.0000000  |
| C | -7.2456359 | -0.0484532 | -1.2539566 |
| H | -7.9280730 | -0.0825108 | -2.1142803 |
| C | -5.8813662 | -0.0023331 | -1.5275505 |
| C | -5.4807012 | 0.0432816  | -2.9866267 |
| H | -6.1141032 | -0.6114555 | -3.6000903 |
| H | -5.5782497 | 1.0569005  | -3.3950362 |
| H | -4.4414039 | -0.2617604 | -3.1365597 |
| C | -5.4807012 | 0.0432816  | 2.9866267  |
| H | -5.5782497 | 1.0569005  | 3.3950362  |
| H | -6.1141032 | -0.6114555 | 3.6000903  |
| H | -4.4414039 | -0.2617604 | 3.1365597  |

**Complex 26** ( $X=H$ ,  $Y=NH_2$ )

|    |           |            |            |
|----|-----------|------------|------------|
| C  | 6.1434366 | -0.0365657 | 0.0000000  |
| C  | 5.4290747 | -0.0454752 | 1.1999659  |
| C  | 4.0354166 | -0.0465504 | 1.1916352  |
| C  | 3.2986297 | -0.0453673 | 0.0000000  |
| C  | 4.0354166 | -0.0465504 | -1.1916352 |
| C  | 5.4290747 | -0.0454752 | -1.1999659 |
| H  | 5.9698566 | -0.0506433 | 2.1433821  |
| H  | 3.5169751 | -0.0553323 | 2.1478961  |
| H  | 3.5169751 | -0.0553323 | -2.1478961 |
| H  | 5.9698566 | -0.0506433 | -2.1433821 |
| Sn | 1.1345415 | 0.0165598  | 0.0000000  |
| H  | 0.7463085 | -0.7733841 | 1.4361654  |
| H  | 0.7684944 | 1.6614434  | 0.0000000  |
| H  | 0.7463085 | -0.7733841 | -1.4361654 |
| N  | 7.5514265 | -0.0954939 | 0.0000000  |

|    |            |            |            |
|----|------------|------------|------------|
| H  | 7.9538507  | 0.3252465  | -0.8275420 |
| H  | 7.9538507  | 0.3252465  | 0.8275420  |
| Sn | -2.5317582 | -0.0062381 | 0.0000000  |
| C  | -3.9759388 | -0.0180070 | 1.5273637  |
| C  | -5.3405486 | -0.0514171 | 1.2541065  |
| H  | -6.0233945 | -0.0797295 | 2.1143792  |
| C  | -5.9671696 | -0.0637501 | 0.0000000  |
| H  | -7.0548944 | -0.1064819 | 0.0000000  |
| C  | -5.3405486 | -0.0514171 | -1.2541065 |
| H  | -6.0233945 | -0.0797295 | -2.1143792 |
| C  | -3.9759388 | -0.0180070 | -1.5273637 |
| C  | -3.5734651 | 0.0211477  | -2.9862171 |
| H  | -4.2128775 | -0.6277756 | -3.5997117 |
| H  | -3.6593706 | 1.0351250  | -3.3964321 |
| H  | -2.5372405 | -0.2952579 | -3.1343267 |
| C  | -3.5734651 | 0.0211477  | 2.9862171  |
| H  | -3.6593706 | 1.0351250  | 3.3964321  |
| H  | -4.2128775 | -0.6277756 | 3.5997117  |
| H  | -2.5372405 | -0.2952579 | 3.1343267  |

**Complex 27** (X=H, Y=NMe<sub>2</sub>)

|   |           |            |            |
|---|-----------|------------|------------|
| C | 4.9200149 | -0.1679153 | 0.0000000  |
| C | 4.1873523 | -0.1632034 | 1.1992468  |
| C | 2.7936514 | -0.1710894 | 1.1866852  |
| C | 2.0516728 | -0.1725866 | 0.0000000  |
| C | 2.7936514 | -0.1710894 | -1.1866852 |
| C | 4.1873523 | -0.1632034 | -1.1992468 |
| H | 4.6952738 | -0.1591685 | 2.1551053  |
| H | 2.2803170 | -0.1752898 | 2.1459438  |
| H | 2.2803170 | -0.1752898 | -2.1459438 |
| H | 4.6952738 | -0.1591685 | -2.1551053 |

|    |            |            |            |
|----|------------|------------|------------|
| Sn | -0.1094406 | -0.1130402 | 0.0000000  |
| N  | 6.3244178  | -0.2053939 | 0.0000000  |
| C  | 6.9728580  | 0.2544950  | -1.2120675 |
| H  | 8.0524557  | 0.2048037  | -1.0706101 |
| H  | 6.7227821  | -0.3925122 | -2.0525082 |
| H  | 6.6983387  | 1.2869285  | -1.4782360 |
| C  | 6.9728580  | 0.2544950  | 1.2120675  |
| H  | 6.6983387  | 1.2869285  | 1.4782360  |
| H  | 6.7227821  | -0.3925122 | 2.0525082  |
| H  | 8.0524557  | 0.2048037  | 1.0706101  |
| H  | -0.5099106 | -0.9053899 | 1.4314483  |
| H  | -0.4847309 | 1.5291067  | 0.0000000  |
| H  | -0.5099106 | -0.9053899 | -1.4314483 |
| Sn | -3.8390413 | -0.0826343 | 0.0000000  |
| C  | -5.2858754 | -0.0447080 | 1.5266368  |
| C  | -6.6510732 | -0.0375006 | 1.2536949  |
| H  | -7.3343520 | -0.0438828 | 2.1141292  |
| C  | -7.2783111 | -0.0326158 | 0.0000000  |
| H  | -8.3669227 | -0.0441952 | 0.0000000  |
| C  | -6.6510732 | -0.0375006 | -1.2536949 |
| H  | -7.3343520 | -0.0438828 | -2.1141292 |
| C  | -5.2858754 | -0.0447080 | -1.5266368 |
| C  | -4.8849643 | -0.0129873 | -2.9862555 |
| H  | -5.5361976 | -0.6513033 | -3.5984889 |
| H  | -4.9550513 | 1.0020786  | -3.3970593 |
| H  | -3.8544341 | -0.3466333 | -3.1359867 |
| C  | -4.8849643 | -0.0129873 | 2.9862555  |
| H  | -4.9550513 | 1.0020786  | 3.3970593  |
| H  | -5.5361976 | -0.6513033 | 3.5984889  |
| H  | -3.8544341 | -0.3466333 | 3.1359867  |

**Complex 28** (X=F, Y=H)

|    |            |            |            |
|----|------------|------------|------------|
| C  | 6.6421044  | -0.0565994 | 0.0000000  |
| C  | 5.9403999  | -0.0483248 | 1.2042610  |
| C  | 4.5452273  | -0.0273693 | 1.1968210  |
| C  | 3.8158827  | -0.0146211 | 0.0000000  |
| C  | 4.5452273  | -0.0273693 | -1.1968210 |
| C  | 5.9403999  | -0.0483248 | -1.2042610 |
| H  | 6.4793931  | -0.0590964 | 2.1467151  |
| H  | 4.0181843  | -0.0292752 | 2.1483580  |
| H  | 4.0181843  | -0.0292752 | -2.1483580 |
| H  | 6.4793931  | -0.0590964 | -2.1467151 |
| Sn | 1.6487604  | 0.0494101  | 0.0000000  |
| H  | 1.2664071  | -0.7425263 | 1.4364694  |
| H  | 1.2867630  | 1.6945650  | 0.0000000  |
| H  | 1.2664071  | -0.7425263 | -1.4364694 |
| H  | 7.7269226  | -0.0742655 | 0.0000000  |
| Sn | -2.0026355 | 0.0085423  | 0.0000000  |
| C  | -3.4515513 | 0.0036008  | 1.5240204  |
| C  | -4.8181402 | -0.0233702 | 1.2582457  |
| H  | -5.5271130 | -0.0494653 | 2.0930863  |
| C  | -5.4110785 | -0.0339772 | 0.0000000  |
| C  | -4.8181402 | -0.0233702 | -1.2582457 |
| H  | -5.5271130 | -0.0494653 | -2.0930863 |
| C  | -3.4515513 | 0.0036008  | -1.5240204 |
| C  | -3.0546744 | 0.0446481  | -2.9841010 |
| H  | -3.6957627 | -0.6028701 | -3.5968284 |
| H  | -3.1413483 | 1.0595072  | -3.3916972 |
| H  | -2.0190101 | -0.2722027 | -3.1339716 |
| C  | -3.0546744 | 0.0446481  | 2.9841010  |
| H  | -3.1413483 | 1.0595072  | 3.3916972  |
| H  | -3.6957627 | -0.6028701 | 3.5968284  |

|   |            |            |           |
|---|------------|------------|-----------|
| H | -2.0190101 | -0.2722027 | 3.1339716 |
| F | -6.7907424 | -0.0795658 | 0.0000000 |

**Complex 29** ( $X=F$ ,  $Y=F$ )

|    |            |            |            |
|----|------------|------------|------------|
| C  | 6.5750646  | -0.0400500 | 0.0000000  |
| C  | 5.9051643  | -0.0347489 | 1.2118079  |
| C  | 4.5094069  | -0.0209620 | 1.1954889  |
| C  | 3.7784270  | -0.0130194 | 0.0000000  |
| C  | 4.5094069  | -0.0209620 | -1.1954889 |
| C  | 5.9051643  | -0.0347489 | -1.2118079 |
| H  | 6.4694549  | -0.0430232 | 2.1375289  |
| H  | 3.9863483  | -0.0243454 | 2.1488272  |
| H  | 3.9863483  | -0.0243454 | -2.1488272 |
| H  | 6.4694549  | -0.0430232 | -2.1375289 |
| Sn | 1.6061842  | 0.0403183  | 0.0000000  |
| H  | 1.2481496  | -0.7574056 | 1.4395927  |
| H  | 1.2573638  | 1.6874870  | 0.0000000  |
| H  | 1.2481496  | -0.7574056 | -1.4395927 |
| F  | 7.9301528  | -0.0556801 | 0.0000000  |
| Sn | -1.9919079 | 0.0195595  | 0.0000000  |
| C  | -3.4376949 | 0.0026964  | 1.5249257  |
| C  | -4.8036974 | -0.0359258 | 1.2584009  |
| H  | -5.5124509 | -0.0681266 | 2.0930298  |
| C  | -5.3961629 | -0.0517220 | 0.0000000  |
| C  | -4.8036974 | -0.0359258 | -1.2584009 |
| H  | -5.5124509 | -0.0681266 | -2.0930298 |
| C  | -3.4376949 | 0.0026964  | -1.5249257 |
| C  | -3.0410277 | 0.0474670  | -2.9846585 |
| H  | -3.6768760 | -0.6048890 | -3.5976761 |
| H  | -3.1357169 | 1.0617353  | -3.3918509 |
| H  | -2.0030173 | -0.2613414 | -3.1341704 |



|   |            |            |           |
|---|------------|------------|-----------|
| C | -3.0410277 | 0.0474670  | 2.9846585 |
| H | -3.1357169 | 1.0617353  | 3.3918509 |
| H | -3.6768760 | -0.6048890 | 3.5976761 |
| H | -2.0030173 | -0.2613414 | 3.1341704 |
| F | -6.7752072 | -0.1091551 | 0.0000000 |

**Complex 30** ( $X = F$ ,  $Y = CF_3$ )

|    |            |            |            |
|----|------------|------------|------------|
| C  | 5.8105303  | 0.0120940  | 0.0000000  |
| C  | 5.1163139  | 0.0056591  | 1.2087685  |
| C  | 3.7227289  | 0.0041830  | 1.1949180  |
| C  | 2.9907759  | 0.0043944  | 0.0000000  |
| C  | 3.7227289  | 0.0041830  | -1.1949180 |
| C  | 5.1163139  | 0.0056591  | -1.2087685 |
| H  | 5.6602227  | 0.0090779  | 2.1467315  |
| H  | 3.1978574  | -0.0038040 | 2.1473816  |
| H  | 3.1978574  | -0.0038040 | -2.1473816 |
| H  | 5.6602227  | 0.0090779  | -2.1467315 |
| Sn | 0.8054998  | 0.0442062  | 0.0000000  |
| H  | 0.4937344  | -0.7564496 | 1.4492225  |
| H  | 0.4890856  | 1.6980621  | 0.0000000  |
| H  | 0.4937344  | -0.7564496 | -1.4492225 |
| C  | 7.3024814  | -0.0420211 | 0.0000000  |
| F  | 7.7635902  | -1.3118369 | 0.0000000  |
| F  | 7.8392123  | 0.5529919  | 1.0804803  |
| F  | 7.8392123  | 0.5529919  | -1.0804803 |
| Sn | -2.6947374 | 0.0023311  | 0.0000000  |
| C  | -4.1341719 | -0.0112688 | 1.5266706  |
| C  | -5.4997907 | -0.0502356 | 1.2586956  |
| H  | -6.2087930 | -0.0800003 | 2.0929604  |
| C  | -6.0917362 | -0.0671920 | 0.0000000  |
| C  | -5.4997907 | -0.0502356 | -1.2586956 |

|   |            |            |            |
|---|------------|------------|------------|
| H | -6.2087930 | -0.0800003 | -2.0929604 |
| C | -4.1341719 | -0.0112688 | -1.5266706 |
| C | -3.7368124 | 0.0405051  | -2.9857176 |
| H | -4.3691231 | -0.6124624 | -3.6014273 |
| H | -3.8368731 | 1.0560063  | -3.3882289 |
| H | -2.6972347 | -0.2621738 | -3.1362236 |
| C | -3.7368124 | 0.0405051  | 2.9857176  |
| H | -3.8368731 | 1.0560063  | 3.3882289  |
| H | -4.3691231 | -0.6124624 | 3.6014273  |
| H | -2.6972347 | -0.2621738 | 3.1362236  |
| F | -7.4700307 | -0.1240951 | 0.0000000  |

**Complex 31** ( $X = F$ ,  $Y = CN$ )

|    |            |            |            |
|----|------------|------------|------------|
| C  | 6.2612933  | -0.0333112 | 0.0000000  |
| C  | 5.5632382  | -0.0297718 | 1.2132571  |
| C  | 4.1709259  | -0.0184753 | 1.1958229  |
| C  | 3.4386514  | -0.0099215 | 0.0000000  |
| C  | 4.1709259  | -0.0184753 | -1.1958229 |
| C  | 5.5632382  | -0.0297718 | -1.2132571 |
| H  | 6.1142296  | -0.0367657 | 2.1478987  |
| H  | 3.6449895  | -0.0237206 | 2.1478336  |
| H  | 3.6449895  | -0.0237206 | -2.1478336 |
| H  | 6.1142296  | -0.0367657 | -2.1478987 |
| Sn | 1.2470716  | 0.0445074  | 0.0000000  |
| H  | 0.9454932  | -0.7542187 | 1.4525168  |
| H  | 0.9534032  | 1.7026322  | 0.0000000  |
| H  | 0.9454932  | -0.7542187 | -1.4525168 |
| C  | 7.6916494  | -0.0431679 | 0.0000000  |
| N  | 8.8649134  | -0.0501671 | 0.0000000  |
| Sn | -2.2320060 | 0.0113097  | 0.0000000  |
| C  | -3.6696224 | -0.0013927 | 1.5272345  |

|   |            |            |            |
|---|------------|------------|------------|
| C | -5.0355424 | -0.0345470 | 1.2590178  |
| H | -5.7452316 | -0.0611107 | 2.0929475  |
| C | -5.6272206 | -0.0480365 | 0.0000000  |
| C | -5.0355424 | -0.0345470 | -1.2590178 |
| H | -5.7452316 | -0.0611107 | -2.0929475 |
| C | -3.6696224 | -0.0013927 | -1.5272345 |
| C | -3.2725238 | 0.0424060  | -2.9867920 |
| H | -3.8742575 | -0.6488833 | -3.5908517 |
| H | -3.4170005 | 1.0450045  | -3.4076788 |
| H | -2.2207578 | -0.2175107 | -3.1317971 |
| C | -3.2725238 | 0.0424060  | 2.9867920  |
| H | -3.4170005 | 1.0450045  | 3.4076788  |
| H | -3.8742575 | -0.6488833 | 3.5908517  |
| H | -2.2207578 | -0.2175107 | 3.1317971  |
| F | -7.0056363 | -0.0958728 | 0.0000000  |

**Complex 32** ( $X = F$ ,  $Y = P(CN)_2$ )

|    |           |            |            |
|----|-----------|------------|------------|
| C  | 5.4745443 | -0.3650106 | 0.0000000  |
| C  | 4.7792171 | -0.3304285 | 1.2120561  |
| C  | 3.3874201 | -0.2410810 | 1.1939730  |
| C  | 2.6552229 | -0.1961339 | 0.0000000  |
| C  | 3.3874201 | -0.2410810 | -1.1939730 |
| C  | 4.7792171 | -0.3304285 | -1.2120561 |
| H  | 5.3133235 | -0.3561539 | 2.1579929  |
| H  | 2.8644446 | -0.2113723 | 2.1477440  |
| H  | 2.8644446 | -0.2113723 | -2.1477440 |
| H  | 5.3133235 | -0.3561539 | -2.1579929 |
| Sn | 0.4603459 | -0.0418071 | 0.0000000  |
| H  | 0.1652119 | -0.8299381 | 1.4613292  |
| H  | 0.2682866 | 1.6318090  | 0.0000000  |
| H  | 0.1652119 | -0.8299381 | -1.4613292 |

|    |            |            |            |
|----|------------|------------|------------|
| P  | 7.2630172  | -0.6933764 | 0.0000000  |
| C  | 7.7897113  | 0.3738488  | 1.3288767  |
| N  | 8.1752207  | 0.9543966  | 2.2755839  |
| C  | 7.7897113  | 0.3738488  | -1.3288767 |
| N  | 8.1752207  | 0.9543966  | -2.2755839 |
| Sn | -2.9299504 | 0.0337132  | 0.0000000  |
| C  | -4.3609186 | 0.0444033  | 1.5293619  |
| C  | -5.7265553 | 0.0417810  | 1.2590676  |
| H  | -6.4365971 | 0.0252129  | 2.0925065  |
| C  | -6.3180739 | 0.0438291  | 0.0000000  |
| C  | -5.7265553 | 0.0417810  | -1.2590676 |
| H  | -6.4365971 | 0.0252129  | -2.0925065 |
| C  | -4.3609186 | 0.0444033  | -1.5293619 |
| C  | -3.9617977 | 0.0686758  | -2.9884375 |
| H  | -4.6191027 | -0.5659545 | -3.5967079 |
| H  | -4.0231820 | 1.0830751  | -3.4007843 |
| H  | -2.9349692 | -0.2755174 | -3.1364633 |
| C  | -3.9617977 | 0.0686758  | 2.9884375  |
| H  | -4.0231820 | 1.0830751  | 3.4007843  |
| H  | -4.6191027 | -0.5659545 | 3.5967079  |
| H  | -2.9349692 | -0.2755174 | 3.1364633  |
| F  | -7.6962460 | 0.0250811  | 0.0000000  |

**Complex 33** ( $X = F$ ,  $Y = SO_2CN$ )

|   |           |           |            |
|---|-----------|-----------|------------|
| C | 5.4799358 | 0.2703577 | 0.0000000  |
| C | 4.8040398 | 0.2352866 | 1.2208496  |
| C | 3.4123827 | 0.1767145 | 1.1972360  |
| C | 2.6817725 | 0.1469231 | 0.0000000  |
| C | 3.4123827 | 0.1767145 | -1.1972360 |
| C | 4.8040398 | 0.2352866 | -1.2208496 |
| H | 5.3601910 | 0.2680679 | 2.1511202  |

|    |            |            |            |
|----|------------|------------|------------|
| H  | 2.8848258  | 0.1488261  | 2.1481097  |
| H  | 2.8848258  | 0.1488261  | -2.1481097 |
| H  | 5.3601910  | 0.2680679  | -2.1511202 |
| Sn | 0.4696413  | 0.1207645  | 0.0000000  |
| H  | 0.2556639  | -0.6882170 | 1.4639488  |
| H  | 0.1878454  | 1.7819649  | 0.0000000  |
| H  | 0.2556639  | -0.6882170 | -1.4639488 |
| S  | 7.2141427  | 0.3234179  | 0.0000000  |
| O  | 7.7061652  | 0.8182639  | 1.2533404  |
| O  | 7.7061652  | 0.8182639  | -1.2533404 |
| C  | 7.5962623  | -1.3972230 | 0.0000000  |
| N  | 7.8789283  | -2.5382535 | 0.0000000  |
| Sn | -2.8900553 | -0.0017580 | 0.0000000  |
| C  | -4.3174952 | -0.0381603 | 1.5305229  |
| C  | -5.6818835 | -0.0966358 | 1.2593387  |
| H  | -6.3913471 | -0.1363536 | 2.0924561  |
| C  | -6.2724654 | -0.1211844 | 0.0000000  |
| C  | -5.6818835 | -0.0966358 | -1.2593387 |
| H  | -6.3913471 | -0.1363536 | -2.0924561 |
| C  | -4.3174952 | -0.0381603 | -1.5305229 |
| C  | -3.9212266 | 0.0146466  | -2.9897141 |
| H  | -4.5223582 | -0.6743980 | -3.5965154 |
| H  | -4.0684504 | 1.0191800  | -3.4044730 |
| H  | -2.8692756 | -0.2420352 | -3.1379105 |
| C  | -3.9212266 | 0.0146466  | 2.9897141  |
| H  | -4.0684504 | 1.0191800  | 3.4044730  |
| H  | -4.5223582 | -0.6743980 | 3.5965154  |
| H  | -2.8692756 | -0.2420352 | 3.1379105  |
| F  | -7.6484711 | -0.1953810 | 0.0000000  |

**Complex 34** (X= F, Y=tBu)

|    |            |            |            |
|----|------------|------------|------------|
| C  | 4.2817705  | 0.0436058  | 0.0000000  |
| C  | 3.5508319  | 0.0317584  | 1.1945916  |
| C  | 2.1558065  | 0.0214280  | 1.1901570  |
| C  | 1.4181515  | 0.0188628  | 0.0000000  |
| C  | 2.1558065  | 0.0214280  | -1.1901570 |
| C  | 3.5508319  | 0.0317584  | -1.1945916 |
| H  | 4.0656403  | 0.0324226  | 2.1489775  |
| H  | 1.6383419  | 0.0104698  | 2.1471169  |
| H  | 1.6383419  | 0.0104698  | -2.1471169 |
| H  | 4.0656403  | 0.0324226  | -2.1489775 |
| Sn | -0.7470008 | 0.0440648  | 0.0000000  |
| H  | -1.1319308 | -0.7571360 | 1.4304700  |
| H  | -1.1492779 | 1.6791148  | 0.0000000  |
| H  | -1.1319308 | -0.7571360 | -1.4304700 |
| C  | 5.8032502  | -0.0113763 | 0.0000000  |
| C  | 6.3903320  | 0.6741601  | 1.2355161  |
| H  | 6.1268045  | 0.1540668  | 2.1576745  |
| H  | 7.4818172  | 0.6835358  | 1.1672800  |
| H  | 6.0416012  | 1.7069146  | 1.3141225  |
| C  | 6.3903320  | 0.6741601  | -1.2355161 |
| H  | 7.4818172  | 0.6835358  | -1.1672800 |
| H  | 6.1268045  | 0.1540668  | -2.1576745 |
| H  | 6.0416012  | 1.7069146  | -1.3141225 |
| C  | 6.2322572  | -1.4835742 | 0.0000000  |
| H  | 5.8442926  | -1.9964486 | -0.8835757 |
| H  | 7.3241203  | -1.5688036 | 0.0000000  |
| H  | 5.8442926  | -1.9964486 | 0.8835757  |
| Sn | -4.4598888 | -0.0001496 | 0.0000000  |
| C  | -5.9116534 | 0.0001320  | 1.5233013  |
| C  | -7.2786990 | -0.0196404 | 1.2582055  |
| H  | -7.9881770 | -0.0386646 | 2.0930163  |

|   |            |            |            |
|---|------------|------------|------------|
| C | -7.8716076 | -0.0272603 | 0.0000000  |
| C | -7.2786990 | -0.0196404 | -1.2582055 |
| H | -7.9881770 | -0.0386646 | -2.0930163 |
| C | -5.9116534 | 0.0001320  | -1.5233013 |
| C | -5.5189208 | 0.0346077  | -2.9849437 |
| H | -6.0945927 | -0.6902407 | -3.5755174 |
| H | -5.7031404 | 1.0231620  | -3.4242688 |
| H | -4.4581201 | -0.1878961 | -3.1277455 |
| C | -5.5189208 | 0.0346077  | 2.9849437  |
| H | -5.7031404 | 1.0231620  | 3.4242688  |
| H | -6.0945927 | -0.6902407 | 3.5755174  |
| H | -4.4581201 | -0.1878961 | 3.1277455  |
| F | -9.2522425 | -0.0597469 | 0.0000000  |

**Complex 35** (X= F, Y=NH<sub>2</sub>)

|    |           |            |            |
|----|-----------|------------|------------|
| C  | 6.1992207 | -0.0429459 | 0.0000000  |
| C  | 5.4845130 | -0.0490142 | 1.1998686  |
| C  | 4.0908743 | -0.0488939 | 1.1919686  |
| C  | 3.3542840 | -0.0485198 | 0.0000000  |
| C  | 4.0908743 | -0.0488939 | -1.1919686 |
| C  | 5.4845130 | -0.0490142 | -1.1998686 |
| H  | 6.0255731 | -0.0548985 | 2.1430262  |
| H  | 3.5732171 | -0.0558506 | 2.1484023  |
| H  | 3.5732171 | -0.0558506 | -2.1484023 |
| H  | 6.0255731 | -0.0548985 | -2.1430262 |
| Sn | 1.1948413 | -0.0014426 | 0.0000000  |
| H  | 0.7862698 | -0.7954160 | 1.4280923  |
| H  | 0.7969000 | 1.6353258  | 0.0000000  |
| H  | 0.7862698 | -0.7954160 | -1.4280923 |
| N  | 7.6059469 | -0.1099530 | 0.0000000  |
| H  | 8.0129765 | 0.3049547  | -0.8281307 |

|    |            |            |            |
|----|------------|------------|------------|
| H  | 8.0129765  | 0.3049547  | 0.8281307  |
| Sn | -2.5535111 | -0.0127345 | 0.0000000  |
| C  | -4.0068009 | -0.0133840 | 1.5231254  |
| C  | -5.3738158 | -0.0342195 | 1.2582530  |
| H  | -6.0832920 | -0.0548830 | 2.0930606  |
| C  | -5.9666207 | -0.0419573 | 0.0000000  |
| C  | -5.3738158 | -0.0342195 | -1.2582530 |
| H  | -6.0832920 | -0.0548830 | -2.0930606 |
| C  | -4.0068009 | -0.0133840 | -1.5231254 |
| C  | -3.6134755 | 0.0258871  | -2.9844455 |
| H  | -4.2099121 | -0.6743019 | -3.5842192 |
| H  | -3.7686125 | 1.0245587  | -3.4116230 |
| H  | -2.5593571 | -0.2245501 | -3.1302296 |
| C  | -3.6134755 | 0.0258871  | 2.9844455  |
| H  | -3.7686125 | 1.0245587  | 3.4116230  |
| H  | -4.2099121 | -0.6743019 | 3.5842192  |
| H  | -2.5593571 | -0.2245501 | 3.1302296  |
| F  | -7.3473771 | -0.0777500 | 0.0000000  |

**Complex 36** ( $X = F$ ,  $Y = NMe_2$ )

|    |            |            |            |
|----|------------|------------|------------|
| C  | 4.9405293  | -0.1579210 | 0.0000000  |
| C  | 4.2078335  | -0.1471502 | 1.1993300  |
| C  | 2.8142194  | -0.1478313 | 1.1869940  |
| C  | 2.0727049  | -0.1470543 | 0.0000000  |
| C  | 2.8142194  | -0.1478313 | -1.1869940 |
| C  | 4.2078335  | -0.1471502 | -1.1993300 |
| H  | 4.7157208  | -0.1455478 | 2.1551916  |
| H  | 2.3009766  | -0.1487653 | 2.1461874  |
| H  | 2.3009766  | -0.1487653 | -2.1461874 |
| H  | 4.7157208  | -0.1455478 | -2.1551916 |
| Sn | -0.0852140 | -0.0978776 | 0.0000000  |



|    |            |            |            |
|----|------------|------------|------------|
| H  | -0.4938767 | -0.8921961 | 1.4280233  |
| H  | -0.4864821 | 1.5383088  | 0.0000000  |
| H  | -0.4938767 | -0.8921961 | -1.4280233 |
| N  | 6.3436525  | -0.2075821 | 0.0000000  |
| C  | 6.9979706  | 0.2410156  | 1.2130353  |
| H  | 6.7421252  | -0.4066505 | 2.0513209  |
| H  | 8.0767935  | 0.1807262  | 1.0703522  |
| H  | 6.7344904  | 1.2750919  | 1.4834769  |
| C  | 6.9979706  | 0.2410156  | -1.2130353 |
| H  | 6.7421252  | -0.4066505 | -2.0513209 |
| H  | 6.7344904  | 1.2750919  | -1.4834769 |
| H  | 8.0767935  | 0.1807262  | -1.0703522 |
| Sn | -3.8419062 | -0.1065766 | 0.0000000  |
| C  | -5.2942378 | -0.0539586 | 1.5229562  |
| C  | -6.6611465 | -0.0202092 | 1.2583418  |
| H  | -7.3712513 | -0.0098973 | 2.0929106  |
| C  | -7.2537195 | -0.0043370 | 0.0000000  |
| C  | -6.6611465 | -0.0202092 | -1.2583418 |
| H  | -7.3712513 | -0.0098973 | -2.0929106 |
| C  | -5.2942378 | -0.0539586 | -1.5229562 |
| C  | -4.8999544 | -0.0411856 | -2.9846975 |
| H  | -5.4701941 | -0.7789692 | -3.5644088 |
| H  | -5.0889386 | 0.9388060  | -3.4410422 |
| H  | -3.8378880 | -0.2611879 | -3.1219170 |
| C  | -4.8999544 | -0.0411856 | 2.9846975  |
| H  | -5.0889386 | 0.9388060  | 3.4410422  |
| H  | -5.4701941 | -0.7789692 | 3.5644088  |
| H  | -3.8378880 | -0.2611879 | 3.1219170  |
| F  | -8.6348500 | 0.0188584  | 0.0000000  |

**Complex 37** ( $X=CF_3$ ,  $Y=H$ )

|    |            |            |            |
|----|------------|------------|------------|
| C  | 7.3436824  | -0.0721938 | 0.0000000  |
| C  | 6.6420404  | -0.0644473 | 1.2040792  |
| C  | 5.2468368  | -0.0454135 | 1.1974153  |
| C  | 4.5182454  | -0.0341973 | 0.0000000  |
| C  | 5.2468368  | -0.0454135 | -1.1974153 |
| C  | 6.6420404  | -0.0644473 | -1.2040792 |
| H  | 7.1808475  | -0.0741899 | 2.1464983  |
| H  | 4.7207730  | -0.0467291 | 2.1491439  |
| H  | 4.7207730  | -0.0467291 | -2.1491439 |
| H  | 7.1808475  | -0.0741899 | -2.1464983 |
| Sn | 2.3575180  | 0.0285636  | 0.0000000  |
| H  | 1.9409266  | -0.7626938 | 1.4270548  |
| H  | 1.9672125  | 1.6667672  | 0.0000000  |
| H  | 1.9409266  | -0.7626938 | -1.4270548 |
| H  | 8.4285013  | -0.0885846 | 0.0000000  |
| Sn | -1.3960663 | 0.0356355  | 0.0000000  |
| C  | -2.8511669 | 0.0426776  | 1.5175961  |
| C  | -4.2154287 | 0.0302382  | 1.2555427  |
| H  | -4.8883029 | 0.0082372  | 2.1181523  |
| C  | -4.8450064 | 0.0373311  | 0.0000000  |
| C  | -4.2154287 | 0.0302382  | -1.2555427 |
| H  | -4.8883029 | 0.0082372  | -2.1181523 |
| C  | -2.8511669 | 0.0426776  | -1.5175961 |
| C  | -2.4508957 | 0.0710615  | -2.9774980 |
| H  | -3.1162325 | -0.5499001 | -3.5907683 |
| H  | -2.4999164 | 1.0897753  | -3.3798733 |
| H  | -1.4277961 | -0.2827471 | -3.1285128 |
| C  | -2.4508957 | 0.0710615  | 2.9774980  |
| H  | -2.4999164 | 1.0897753  | 3.3798733  |
| H  | -3.1162325 | -0.5499001 | 3.5907683  |
| H  | -1.4277961 | -0.2827471 | 3.1285128  |

|   |            |            |            |
|---|------------|------------|------------|
| C | -6.3304608 | -0.0651734 | 0.0000000  |
| F | -6.7780711 | -1.3538789 | 0.0000000  |
| F | -6.9144628 | 0.5069962  | 1.0780384  |
| F | -6.9144628 | 0.5069962  | -1.0780384 |

**Complex 38** ( $X=CF_3$ ,  $Y=F$ )

|    |            |            |            |
|----|------------|------------|------------|
| C  | 7.2715713  | -0.0286923 | 0.0000000  |
| C  | 6.6015421  | -0.0241679 | 1.2116364  |
| C  | 5.2058268  | -0.0110908 | 1.1960134  |
| C  | 4.4752792  | -0.0030777 | 0.0000000  |
| C  | 5.2058268  | -0.0110908 | -1.1960134 |
| C  | 6.6015421  | -0.0241679 | -1.2116364 |
| H  | 7.1658405  | -0.0322911 | 2.1371506  |
| H  | 4.6839415  | -0.0144497 | 2.1495648  |
| H  | 4.6839415  | -0.0144497 | -2.1495648 |
| H  | 7.1658405  | -0.0322911 | -2.1371506 |
| Sn | 2.3097139  | 0.0505894  | 0.0000000  |
| H  | 1.9141317  | -0.7448322 | 1.4303649  |
| H  | 1.9265784  | 1.6900159  | 0.0000000  |
| H  | 1.9141317  | -0.7448322 | -1.4303649 |
| F  | 8.6258158  | -0.0425595 | 0.0000000  |
| Sn | -1.3830287 | 0.0397551  | 0.0000000  |
| C  | -2.8350109 | 0.0289668  | 1.5192205  |
| C  | -4.1989029 | 0.0032334  | 1.2560372  |
| H  | -4.8722542 | -0.0265566 | 2.1181264  |
| C  | -4.8275293 | 0.0045785  | 0.0000000  |
| C  | -4.1989029 | 0.0032334  | -1.2560372 |
| H  | -4.8722542 | -0.0265566 | -2.1181264 |
| C  | -2.8350109 | 0.0289668  | -1.5192205 |
| C  | -2.4356036 | 0.0585275  | -2.9794189 |
| H  | -3.0928592 | -0.5730969 | -3.5905463 |

|   |            |            |            |
|---|------------|------------|------------|
| H | -2.4983253 | 1.0753453  | -3.3845708 |
| H | -1.4080391 | -0.2820923 | -3.1301248 |
| C | -2.4356036 | 0.0585275  | 2.9794189  |
| H | -2.4983253 | 1.0753453  | 3.3845708  |
| H | -3.0928592 | -0.5730969 | 3.5905463  |
| H | -1.4080391 | -0.2820923 | 3.1301248  |
| C | -6.3118048 | -0.1156054 | 0.0000000  |
| F | -6.9020167 | 0.4498112  | 1.0779146  |
| F | -6.9020167 | 0.4498112  | -1.0779146 |
| F | -6.7431369 | -1.4096482 | 0.0000000  |

**Complex 39** ( $X=CF_3$ ,  $Y=CF_3$ )

|    |            |            |            |
|----|------------|------------|------------|
| C  | 6.5189987  | -0.0062353 | 0.0000000  |
| C  | 5.8248948  | -0.0091348 | 1.2086734  |
| C  | 4.4315118  | -0.0028143 | 1.1957937  |
| C  | 3.7005351  | 0.0021080  | 0.0000000  |
| C  | 4.4315118  | -0.0028143 | -1.1957937 |
| C  | 5.8248948  | -0.0091348 | -1.2086734 |
| H  | 6.3689860  | -0.0091026 | 2.1465064  |
| H  | 3.9075077  | -0.0078752 | 2.1484162  |
| H  | 3.9075077  | -0.0078752 | -2.1484162 |
| H  | 6.3689860  | -0.0091026 | -2.1465064 |
| Sn | 1.5253796  | 0.0546856  | 0.0000000  |
| H  | 1.1645098  | -0.7415610 | 1.4386967  |
| H  | 1.1782778  | 1.7016987  | 0.0000000  |
| H  | 1.1645098  | -0.7415610 | -1.4386967 |
| C  | 8.0113673  | -0.0669944 | 0.0000000  |
| F  | 8.4651234  | -1.3388368 | 0.0000000  |
| F  | 8.5495153  | 0.5257658  | 1.0804845  |
| F  | 8.5495153  | 0.5257658  | -1.0804845 |
| Sn | -2.0941921 | 0.0366298  | 0.0000000  |

|   |            |            |            |
|---|------------|------------|------------|
| C | -3.5423560 | 0.0323090  | 1.5195272  |
| C | -4.9062103 | 0.0091833  | 1.2557352  |
| H | -5.5793309 | -0.0174241 | 2.1177437  |
| C | -5.5349612 | 0.0112987  | 0.0000000  |
| C | -4.9062103 | 0.0091833  | -1.2557352 |
| H | -5.5793309 | -0.0174241 | -2.1177437 |
| C | -3.5423560 | 0.0323090  | -1.5195272 |
| C | -3.1416238 | 0.0647681  | -2.9789467 |
| H | -3.8030394 | -0.5595630 | -3.5927502 |
| H | -3.1971830 | 1.0838030  | -3.3793700 |
| H | -2.1164596 | -0.2827472 | -3.1303171 |
| C | -3.1416238 | 0.0647681  | 2.9789467  |
| H | -3.1971830 | 1.0838030  | 3.3793700  |
| H | -3.8030394 | -0.5595630 | 3.5927502  |
| H | -2.1164596 | -0.2827472 | 3.1303171  |
| C | -7.0204688 | -0.1023744 | 0.0000000  |
| F | -7.4562391 | -1.3942554 | 0.0000000  |
| F | -7.6076328 | 0.4655309  | -1.0779688 |
| F | -7.6076328 | 0.4655309  | 1.0779688  |

**Complex 40** ( $X=CF_3$ ,  $Y=CN$ )

|   |           |            |            |
|---|-----------|------------|------------|
| C | 6.9474952 | -0.0596382 | 0.0000000  |
| C | 6.2496253 | -0.0520433 | 1.2132204  |
| C | 4.8575828 | -0.0339450 | 1.1966288  |
| C | 4.1266651 | -0.0220278 | 0.0000000  |
| C | 4.8575828 | -0.0339450 | -1.1966288 |
| C | 6.2496253 | -0.0520433 | -1.2132204 |
| H | 6.8002431 | -0.0617579 | 2.1479084  |
| H | 4.3320300 | -0.0366605 | 2.1485505  |
| H | 4.3320300 | -0.0366605 | -2.1485505 |
| H | 6.8002431 | -0.0617579 | -2.1479084 |

|    |            |            |            |
|----|------------|------------|------------|
| Sn | 1.9452163  | 0.0427534  | 0.0000000  |
| H  | 1.6032137  | -0.7528928 | 1.4440527  |
| H  | 1.6248592  | 1.6951899  | 0.0000000  |
| H  | 1.6032137  | -0.7528928 | -1.4440527 |
| C  | 8.3778228  | -0.0802269 | 0.0000000  |
| N  | 9.5509601  | -0.0975541 | 0.0000000  |
| Sn | -1.6166044 | 0.0439716  | 0.0000000  |
| C  | -3.0611003 | 0.0432768  | 1.5207352  |
| C  | -4.4247103 | 0.0203551  | 1.2559160  |
| H  | -5.0978739 | -0.0049749 | 2.1177538  |
| C  | -5.0529638 | 0.0214708  | 0.0000000  |
| C  | -4.4247103 | 0.0203551  | -1.2559160 |
| H  | -5.0978739 | -0.0049749 | -2.1177538 |
| C  | -3.0611003 | 0.0432768  | -1.5207352 |
| C  | -2.6596007 | 0.0801647  | -2.9796454 |
| H  | -3.3296164 | -0.5302916 | -3.5978785 |
| H  | -2.7007094 | 1.1026224  | -3.3729002 |
| H  | -1.6394345 | -0.2806625 | -3.1332841 |
| C  | -2.6596007 | 0.0801647  | 2.9796454  |
| H  | -2.7007094 | 1.1026224  | 3.3729002  |
| H  | -3.3296164 | -0.5302916 | 3.5978785  |
| H  | -1.6394345 | -0.2806625 | 3.1332841  |
| C  | -6.5386800 | -0.0933182 | 0.0000000  |
| F  | -7.1256649 | 0.4742180  | 1.0779977  |
| F  | -7.1256649 | 0.4742180  | -1.0779977 |
| F  | -6.9727392 | -1.3854375 | 0.0000000  |

**Complex 41** ( $X=CF_3$ ,  $Y=P(CN)_2$ )

|   |           |            |           |
|---|-----------|------------|-----------|
| C | 6.1900561 | -0.3676764 | 0.0000000 |
| C | 5.4945504 | -0.3343284 | 1.2117818 |
| C | 4.1025010 | -0.2499479 | 1.1949897 |

|    |            |            |            |
|----|------------|------------|------------|
| C  | 3.3708706  | -0.2086731 | 0.0000000  |
| C  | 4.1025010  | -0.2499479 | -1.1949897 |
| C  | 5.4945504  | -0.3343284 | -1.2117818 |
| H  | 6.0286238  | -0.3565254 | 2.1577344  |
| H  | 3.5810032  | -0.2197686 | 2.1490871  |
| H  | 3.5810032  | -0.2197686 | -2.1490871 |
| H  | 6.0286238  | -0.3565254 | -2.1577344 |
| Sn | 1.1870539  | -0.0633696 | 0.0000000  |
| H  | 0.8351472  | -0.8501673 | 1.4467052  |
| H  | 0.9409539  | 1.6012735  | 0.0000000  |
| H  | 0.8351472  | -0.8501673 | -1.4467052 |
| P  | 7.9812276  | -0.6873538 | 0.0000000  |
| C  | 8.4981094  | 0.3834341  | 1.3291381  |
| N  | 8.8750385  | 0.9685612  | 2.2767517  |
| C  | 8.4981094  | 0.3834341  | -1.3291381 |
| N  | 8.8750385  | 0.9685612  | -2.2767517 |
| Sn | -2.3306703 | 0.0374850  | 0.0000000  |
| C  | -3.7715788 | 0.0594717  | 1.5224333  |
| C  | -5.1350947 | 0.0659291  | 1.2561670  |
| H  | -5.8093067 | 0.0526686  | 2.1174061  |
| C  | -5.7623068 | 0.0812186  | 0.0000000  |
| C  | -5.1350947 | 0.0659291  | -1.2561670 |
| H  | -5.8093067 | 0.0526686  | -2.1174061 |
| C  | -3.7715788 | 0.0594717  | -1.5224333 |
| C  | -3.3720630 | 0.0791782  | -2.9822092 |
| H  | -4.0484266 | -0.5324924 | -3.5921802 |
| H  | -3.4066146 | 1.0976742  | -3.3859275 |
| H  | -2.3553110 | -0.2913125 | -3.1348805 |
| C  | -3.3720630 | 0.0791782  | 2.9822092  |
| H  | -3.4066146 | 1.0976742  | 3.3859275  |
| H  | -4.0484266 | -0.5324924 | 3.5921802  |

|   |            |            |            |
|---|------------|------------|------------|
| H | -2.3553110 | -0.2913125 | 3.1348805  |
| C | -7.2502839 | -0.0030384 | 0.0000000  |
| F | -7.7087091 | -1.2864206 | 0.0000000  |
| F | -7.8256740 | 0.5759027  | 1.0779813  |
| F | -7.8256740 | 0.5759027  | -1.0779813 |

**Complex 42** ( $X=CF_3$ ,  $Y=SO_2CN$ )

|    |            |            |            |
|----|------------|------------|------------|
| C  | 6.1516822  | 0.2447872  | 0.0000000  |
| C  | 5.4760467  | 0.2151623  | 1.2207293  |
| C  | 4.0842614  | 0.1678520  | 1.1981496  |
| C  | 3.3552760  | 0.1447963  | 0.0000000  |
| C  | 4.0842614  | 0.1678520  | -1.1981496 |
| C  | 5.4760467  | 0.2151623  | -1.2207293 |
| H  | 6.0325085  | 0.2427806  | 2.1507265  |
| H  | 3.5563144  | 0.1441330  | 2.1486223  |
| H  | 3.5563144  | 0.1441330  | -2.1486223 |
| H  | 6.0325085  | 0.2427806  | -2.1507265 |
| Sn | 1.1545230  | 0.1343481  | 0.0000000  |
| H  | 0.8995301  | -0.6716631 | 1.4574019  |
| H  | 0.8477276  | 1.7900905  | 0.0000000  |
| H  | 0.8995301  | -0.6716631 | -1.4574019 |
| S  | 7.8872015  | 0.2855962  | 0.0000000  |
| O  | 8.3809939  | 0.7772995  | 1.2536307  |
| O  | 8.3809939  | 0.7772995  | -1.2536307 |
| C  | 8.2535990  | -1.4377543 | 0.0000000  |
| N  | 8.5238795  | -2.5818942 | 0.0000000  |
| Sn | -2.2659716 | 0.0371605  | 0.0000000  |
| C  | -3.7004014 | 0.0163265  | 1.5235857  |
| C  | -5.0632927 | -0.0239256 | 1.2565154  |
| H  | -5.7367144 | -0.0568097 | 2.1177158  |
| C  | -5.6901097 | -0.0304447 | 0.0000000  |



|   |            |            |            |
|---|------------|------------|------------|
| C | -5.0632927 | -0.0239256 | -1.2565154 |
| H | -5.7367144 | -0.0568097 | -2.1177158 |
| C | -3.7004014 | 0.0163265  | -1.5235857 |
| C | -3.2983110 | 0.0593940  | -2.9819063 |
| H | -3.9468118 | -0.5762029 | -3.5973574 |
| H | -3.3735797 | 1.0780974  | -3.3796046 |
| H | -2.2666309 | -0.2678539 | -3.1330055 |
| C | -3.2983110 | 0.0593940  | 2.9819063  |
| H | -3.3735797 | 1.0780974  | 3.3796046  |
| H | -3.9468118 | -0.5762029 | 3.5973574  |
| H | -2.2666309 | -0.2678539 | 3.1330055  |
| C | -7.1758234 | -0.1570409 | 0.0000000  |
| F | -7.5982786 | -1.4520731 | 0.0000000  |
| F | -7.7657656 | 0.4066241  | 1.0777428  |
| F | -7.7657656 | 0.4066241  | -1.0777428 |

**Complex 43** ( $X = CF_3$ ,  $Y = tBu$ )

|    |            |            |            |
|----|------------|------------|------------|
| C  | 4.9344512  | 0.0303722  | 0.0000000  |
| C  | 4.2035015  | 0.0197984  | 1.1945770  |
| C  | 2.8085478  | 0.0112879  | 1.1906866  |
| C  | 2.0720714  | 0.0097276  | 0.0000000  |
| C  | 2.8085478  | 0.0112879  | -1.1906866 |
| C  | 4.2035015  | 0.0197984  | -1.1945770 |
| H  | 4.7189605  | 0.0206298  | 2.1485433  |
| H  | 2.2904312  | 0.0011461  | 2.1471304  |
| H  | 2.2904312  | 0.0011461  | -2.1471304 |
| H  | 4.7189605  | 0.0206298  | -2.1485433 |
| Sn | -0.0871651 | 0.0488650  | 0.0000000  |
| H  | -0.4972440 | -0.7472505 | 1.4263777  |
| H  | -0.4912415 | 1.6836930  | 0.0000000  |
| H  | -0.4972440 | -0.7472505 | -1.4263777 |

|    |            |            |            |
|----|------------|------------|------------|
| C  | 6.4559255  | -0.0278672 | 0.0000000  |
| C  | 7.0448007  | 0.6560782  | 1.2357062  |
| H  | 6.7800665  | 0.1366384  | 2.1578739  |
| H  | 8.1362969  | 0.6624791  | 1.1675372  |
| H  | 6.6989881  | 1.6898072  | 1.3148039  |
| C  | 7.0448007  | 0.6560782  | -1.2357062 |
| H  | 8.1362969  | 0.6624791  | -1.1675372 |
| H  | 6.7800665  | 0.1366384  | -2.1578739 |
| H  | 6.6989881  | 1.6898072  | -1.3148039 |
| C  | 6.8808455  | -1.5014487 | 0.0000000  |
| H  | 6.4915738  | -2.0135763 | -0.8834903 |
| H  | 7.9723783  | -1.5896247 | 0.0000000  |
| H  | 6.4915738  | -2.0135763 | 0.8834903  |
| Sn | -3.8462327 | 0.0430385  | 0.0000000  |
| C  | -5.3020430 | 0.0461893  | 1.5173858  |
| C  | -6.6662783 | 0.0269688  | 1.2555066  |
| H  | -7.3390587 | 0.0020506  | 2.1181412  |
| C  | -7.2959169 | 0.0303649  | 0.0000000  |
| C  | -6.6662783 | 0.0269688  | -1.2555066 |
| H  | -7.3390587 | 0.0020506  | -2.1181412 |
| C  | -5.3020430 | 0.0461893  | -1.5173858 |
| C  | -4.9018001 | 0.0804424  | -2.9771424 |
| H  | -5.5692546 | -0.5346352 | -3.5940472 |
| H  | -4.9469718 | 1.1015527  | -3.3740228 |
| H  | -3.8800159 | -0.2763640 | -3.1296299 |
| C  | -4.9018001 | 0.0804424  | 2.9771424  |
| H  | -4.9469718 | 1.1015527  | 3.3740228  |
| H  | -5.5692546 | -0.5346352 | 3.5940472  |
| H  | -3.8800159 | -0.2763640 | 3.1296299  |
| C  | -8.7804315 | -0.0839089 | 0.0000000  |
| F  | -9.2171948 | -1.3764067 | 0.0000000  |

F -9.3692452 0.4833546 1.0780219  
F -9.3692452 0.4833546 -1.0780219

**Complex 44** ( $X=CF_3$ ,  $Y=NH_2$ )

C 6.8762238 -0.0598690 0.0000000  
C 6.1613494 -0.0647151 1.1999585  
C 4.7679689 -0.0585553 1.1925135  
C 4.0326005 -0.0539054 0.0000000  
C 4.7679689 -0.0585553 -1.1925135  
C 6.1613494 -0.0647151 -1.1999585  
H 6.7016684 -0.0739240 2.1434045  
H 4.2500580 -0.0642771 2.1486991  
H 4.2500580 -0.0642771 -2.1486991  
H 6.7016684 -0.0739240 -2.1434045  
Sn 1.8793107 0.0016560 0.0000000  
H 1.4513312 -0.7898742 1.4239247  
H 1.4678538 1.6354381 0.0000000  
H 1.4513312 -0.7898742 -1.4239247  
N 8.2819735 -0.1298822 0.0000000  
H 8.6917413 0.2813080 -0.8285046  
H 8.6917413 0.2813080 0.8285046  
Sn -1.9191343 0.0119947 0.0000000  
C -3.3768131 0.0238669 1.5167408  
C -4.7412674 0.0122853 1.2554687  
H -5.4140888 -0.0084407 2.1183015  
C -5.3712071 0.0190090 0.0000000  
C -4.7412674 0.0122853 -1.2554687  
H -5.4140888 -0.0084407 -2.1183015  
C -3.3768131 0.0238669 -1.5167408  
C -2.9761405 0.0564516 -2.9765310  
H -3.6429342 -0.5599691 -3.5929257

|   |            |            |            |
|---|------------|------------|------------|
| H | -3.0215560 | 1.0770677  | -3.3747503 |
| H | -1.9540952 | -0.3001539 | -3.1282425 |
| C | -2.9761405 | 0.0564516  | 2.9765310  |
| H | -3.0215560 | 1.0770677  | 3.3747503  |
| H | -3.6429342 | -0.5599691 | 3.5929257  |
| H | -1.9540952 | -0.3001539 | 3.1282425  |
| C | -6.8563038 | -0.0850047 | 0.0000000  |
| F | -7.3029391 | -1.3742852 | 0.0000000  |
| F | -7.4414110 | 0.4863543  | 1.0780843  |
| F | -7.4414110 | 0.4863543  | -1.0780843 |

**Complex 45** ( $X=CF_3$ ,  $Y=NMe_2$ )

|    |           |            |            |
|----|-----------|------------|------------|
| C  | 5.6170631 | -0.1610145 | 0.0000000  |
| C  | 4.8843088 | -0.1493944 | 1.1994052  |
| C  | 3.4909075 | -0.1478079 | 1.1875583  |
| C  | 2.7503632 | -0.1456373 | 0.0000000  |
| C  | 3.4909075 | -0.1478079 | -1.1875583 |
| C  | 4.8843088 | -0.1493944 | -1.1994052 |
| H  | 5.3922287 | -0.1484055 | 2.1551531  |
| H  | 2.9778418 | -0.1474856 | 2.1466585  |
| H  | 2.9778418 | -0.1474856 | -2.1466585 |
| H  | 5.3922287 | -0.1484055 | -2.1551531 |
| Sn | 0.5981222 | -0.0904620 | 0.0000000  |
| H  | 0.1660932 | -0.8817306 | 1.4229886  |
| H  | 0.1832971 | 1.5425815  | 0.0000000  |
| H  | 0.1660932 | -0.8817306 | -1.4229886 |
| N  | 7.0190638 | -0.2110226 | 0.0000000  |
| C  | 7.6747856 | 0.2329806  | 1.2140443  |
| H  | 7.4192372 | -0.4176674 | 2.0501611  |
| H  | 8.7534034 | 0.1726538  | 1.0703579  |
| H  | 7.4119848 | 1.2661359  | 1.4882734  |

C 7.6747856 0.2329806 -1.2140443  
H 7.4192372 -0.4176674 -2.0501611  
H 7.4119848 1.2661359 -1.4882734  
H 8.7534034 0.1726538 -1.0703579  
Sn -3.2150302 -0.0740745 0.0000000  
C -4.6727559 -0.0283805 1.5167918  
C -6.0370677 -0.0123140 1.2552684  
H -6.7098373 -0.0192069 2.1182638  
C -6.6670236 0.0066494 0.0000000  
C -6.0370677 -0.0123140 -1.2552684  
H -6.7098373 -0.0192069 -2.1182638  
C -4.6727559 -0.0283805 -1.5167918  
C -4.2719873 -0.0001969 -2.9766012  
H -4.9768779 -0.5649183 -3.6002730  
H -4.2540476 1.0267550 -3.3603157  
H -3.2739096 -0.4167119 -3.1353986  
C -4.2719873 -0.0001969 2.9766012  
H -4.2540476 1.0267550 3.3603157  
H -4.9768779 -0.5649183 3.6002730  
H -3.2739096 -0.4167119 3.1353986  
C -8.1536772 -0.0697703 0.0000000  
F -8.6245894 -1.3504996 0.0000000  
F -8.7281020 0.5123194 1.0781206  
F -8.7281020 0.5123194 -1.0781206

**Complex 46** (X= CN, Y=H)

C 6.9545258 -0.0632594 0.0000000  
C 6.2532041 -0.0542657 1.2042037  
C 4.8581159 -0.0335414 1.1978491  
C 4.1303954 -0.0216571 0.0000000  
C 4.8581159 -0.0335414 -1.1978491

|    |            |            |            |
|----|------------|------------|------------|
| C  | 6.2532041  | -0.0542657 | -1.2042037 |
| H  | 6.7920871  | -0.0643893 | 2.1464840  |
| H  | 4.3318075  | -0.0342833 | 2.1493421  |
| H  | 4.3318075  | -0.0342833 | -2.1493421 |
| H  | 6.7920871  | -0.0643893 | -2.1464840 |
| Sn | 1.9731430  | 0.0378372  | 0.0000000  |
| H  | 1.5496038  | -0.7541675 | 1.4249162  |
| H  | 1.5682869  | 1.6727247  | 0.0000000  |
| H  | 1.5496038  | -0.7541675 | -1.4249162 |
| H  | 8.0392937  | -0.0816574 | 0.0000000  |
| Sn | -1.8095327 | 0.0399013  | 0.0000000  |
| C  | -3.2623606 | 0.0234406  | 1.5242326  |
| C  | -4.6239201 | -0.0175773 | 1.2630017  |
| H  | -5.3117505 | -0.0491504 | 2.1161009  |
| C  | -5.2499854 | -0.0351138 | 0.0000000  |
| C  | -4.6239201 | -0.0175773 | -1.2630017 |
| H  | -5.3117505 | -0.0491504 | -2.1161009 |
| C  | -3.2623606 | 0.0234406  | -1.5242326 |
| C  | -2.8587002 | 0.0665113  | -2.9823786 |
| H  | -3.5195855 | -0.5517631 | -3.6024890 |
| H  | -2.9117638 | 1.0889342  | -3.3738172 |
| H  | -1.8335303 | -0.2805888 | -3.1336866 |
| C  | -2.8587002 | 0.0665113  | 2.9823786  |
| H  | -2.9117638 | 1.0889342  | 3.3738172  |
| H  | -3.5195855 | -0.5517631 | 3.6024890  |
| H  | -1.8335303 | -0.2805888 | 3.1336866  |
| C  | -6.6787727 | -0.0916439 | 0.0000000  |
| N  | -7.8537686 | -0.1354504 | 0.0000000  |

**Complex 47** (X= CN, Y=F)

|   |           |            |           |
|---|-----------|------------|-----------|
| C | 6.8904712 | -0.0375616 | 0.0000000 |
|---|-----------|------------|-----------|

|    |            |            |            |
|----|------------|------------|------------|
| C  | 6.2203871  | -0.0327370 | 1.2117186  |
| C  | 4.8248703  | -0.0181443 | 1.1965007  |
| C  | 4.0954522  | -0.0086053 | 0.0000000  |
| C  | 4.8248703  | -0.0181443 | -1.1965007 |
| C  | 6.2203871  | -0.0327370 | -1.2117186 |
| H  | 6.7843166  | -0.0414605 | 2.1374299  |
| H  | 4.3026904  | -0.0216468 | 2.1498517  |
| H  | 4.3026904  | -0.0216468 | -2.1498517 |
| H  | 6.7843166  | -0.0414605 | -2.1374299 |
| Sn | 1.9348864  | 0.0530750  | 0.0000000  |
| H  | 1.5251857  | -0.7382784 | 1.4286735  |
| H  | 1.5482465  | 1.6919887  | 0.0000000  |
| H  | 1.5251857  | -0.7382784 | -1.4286735 |
| F  | 8.2441877  | -0.0520834 | 0.0000000  |
| Sn | -1.8015162 | 0.0396855  | 0.0000000  |
| C  | -3.2516330 | 0.0122659  | 1.5252201  |
| C  | -4.6127707 | -0.0397849 | 1.2633187  |
| H  | -5.3009083 | -0.0764446 | 2.1159535  |
| C  | -5.2380756 | -0.0625534 | 0.0000000  |
| C  | -4.6127707 | -0.0397849 | -1.2633187 |
| H  | -5.3009083 | -0.0764446 | -2.1159535 |
| C  | -3.2516330 | 0.0122659  | -1.5252201 |
| C  | -2.8469110 | 0.0595103  | -2.9830397 |
| H  | -3.5021926 | -0.5633374 | -3.6045656 |
| H  | -2.9070928 | 1.0817896  | -3.3738962 |
| H  | -1.8188820 | -0.2796110 | -3.1333303 |
| C  | -2.8469110 | 0.0595103  | 2.9830397  |
| H  | -2.9070928 | 1.0817896  | 3.3738962  |
| H  | -3.5021926 | -0.5633374 | 3.6045656  |
| H  | -1.8188820 | -0.2796110 | 3.1333303  |
| C  | -6.6664985 | -0.1286888 | 0.0000000  |

N -7.8412730 -0.1794986 0.0000000

**Complex 48** (X= CN, Y=CF<sub>3</sub>)

C 6.1286486 0.0029246 0.0000000

C 5.4347217 0.0028068 1.2087051

C 4.0414587 0.0116485 1.1962286

C 3.3113267 0.0162572 0.0000000

C 4.0414587 0.0116485 -1.1962286

C 5.4347217 0.0028068 -1.2087051

H 5.9790111 0.0026508 2.1463774

H 3.5173254 0.0091583 2.1486074

H 3.5173254 0.0091583 -2.1486074

H 5.9790111 0.0026508 -2.1463774

Sn 1.1404642 0.0558489 0.0000000

H 0.7692368 -0.7429935 1.4346752

H 0.7647749 1.6963216 0.0000000

H 0.7692368 -0.7429935 -1.4346752

C 7.6210917 -0.0625377 0.0000000

F 8.0703051 -1.3357262 0.0000000

F 8.1604644 0.5286369 1.0804895

F 8.1604644 0.5286369 -1.0804895

Sn -2.5167515 0.0255911 0.0000000

C -3.9629046 0.0038715 1.5263037

C -5.3236753 -0.0515260 1.2632180

H -6.0114484 -0.0858768 2.1158858

C -5.9485694 -0.0784769 0.0000000

C -5.3236753 -0.0515260 -1.2632180

H -6.0114484 -0.0858768 -2.1158858

C -3.9629046 0.0038715 -1.5263037

C -3.5592171 0.0668249 -2.9835239

H -4.2322778 -0.5259687 -3.6152701



|   |            |            |            |
|---|------------|------------|------------|
| H | -3.5937509 | 1.0978901  | -3.3534787 |
| H | -2.5406376 | -0.2956475 | -3.1433939 |
| C | -3.5592171 | 0.0668249  | 2.9835239  |
| H | -3.5937509 | 1.0978901  | 3.3534787  |
| H | -4.2322778 | -0.5259687 | 3.6152701  |
| H | -2.5406376 | -0.2956475 | 3.1433939  |
| C | -7.3767802 | -0.1524111 | 0.0000000  |
| N | -8.5511224 | -0.2107425 | 0.0000000  |

**Complex 49** (X= CN, Y=CN)

|    |            |            |            |
|----|------------|------------|------------|
| C  | 6.5659940  | -0.0431653 | 0.0000000  |
| C  | 5.8682209  | -0.0349480 | 1.2132409  |
| C  | 4.4762919  | -0.0171717 | 1.1970550  |
| C  | 3.7460263  | -0.0070408 | 0.0000000  |
| C  | 4.4762919  | -0.0171717 | -1.1970550 |
| C  | 5.8682209  | -0.0349480 | -1.2132409 |
| H  | 6.4186974  | -0.0452668 | 2.1479806  |
| H  | 3.9510339  | -0.0190258 | 2.1489639  |
| H  | 3.9510339  | -0.0190258 | -2.1489639 |
| H  | 6.4186974  | -0.0452668 | -2.1479806 |
| Sn | 1.5695338  | 0.0480434  | 0.0000000  |
| H  | 1.2104476  | -0.7506324 | 1.4377532  |
| H  | 1.2269450  | 1.6956939  | 0.0000000  |
| H  | 1.2104476  | -0.7506324 | -1.4377532 |
| C  | 7.9963285  | -0.0648158 | 0.0000000  |
| N  | 9.1694493  | -0.0818822 | 0.0000000  |
| Sn | -2.0358885 | 0.0416773  | 0.0000000  |
| C  | -3.4790376 | 0.0175512  | 1.5272423  |
| C  | -4.8398035 | -0.0355842 | 1.2634781  |
| H  | -5.5279959 | -0.0719958 | 2.1156939  |
| C  | -5.4641754 | -0.0599048 | 0.0000000  |

C -4.8398035 -0.0355842 -1.2634781  
H -5.5279959 -0.0719958 -2.1156939  
C -3.4790376 0.0175512 -1.5272423  
C -3.0743002 0.0711850 -2.9844687  
H -3.7415366 -0.5330244 -3.6113888  
H -3.1166108 1.0982856 -3.3644147  
H -2.0527338 -0.2847478 -3.1395165  
C -3.0743002 0.0711850 2.9844687  
H -3.1166108 1.0982856 3.3644147  
H -3.7415366 -0.5330244 3.6113888  
H -2.0527338 -0.2847478 3.1395165  
C -6.8925894 -0.1308573 0.0000000  
N -8.0669700 -0.1869981 0.0000000

**Complex 50** ( $X=CN$ ,  $Y=P(CN)_2$ )

C 5.8052863 -0.3712354 0.0000000  
C 5.1094938 -0.3373629 1.2115542  
C 3.7177611 -0.2510134 1.1953434  
C 2.9871914 -0.2082066 0.0000000  
C 3.7177611 -0.2510134 -1.1953434  
C 5.1094938 -0.3373629 -1.2115542  
H 5.6432313 -0.3610736 2.1575071  
H 3.1961801 -0.2208608 2.1491461  
H 3.1961801 -0.2208608 -2.1491461  
H 5.6432313 -0.3610736 -2.1575071  
Sn 0.8108765 -0.0568336 0.0000000  
H 0.4355240 -0.8413787 1.4415712  
H 0.5497767 1.6053237 0.0000000  
H 0.4355240 -0.8413787 -1.4415712  
P 7.5966654 -0.6926952 0.0000000  
C 8.1131235 0.3771056 1.3298914

|    |            |            |            |
|----|------------|------------|------------|
| N  | 8.4893898  | 0.9600659  | 2.2788948  |
| C  | 8.1131235  | 0.3771056  | -1.3298914 |
| N  | 8.4893898  | 0.9600659  | -2.2788948 |
| Sn | -2.7617340 | 0.0577382  | 0.0000000  |
| C  | -4.2030647 | 0.0563159  | 1.5276840  |
| C  | -5.5644837 | 0.0283204  | 1.2634864  |
| H  | -6.2532108 | 0.0041909  | 2.1156218  |
| C  | -6.1888941 | 0.0159934  | 0.0000000  |
| C  | -5.5644837 | 0.0283204  | -1.2634864 |
| H  | -6.2532108 | 0.0041909  | -2.1156218 |
| C  | -4.2030647 | 0.0563159  | -1.5276840 |
| C  | -3.7975357 | 0.0995113  | -2.9848527 |
| H  | -4.4810548 | -0.4873113 | -3.6106317 |
| H  | -3.8130660 | 1.1272439  | -3.3650005 |
| H  | -2.7858820 | -0.2834162 | -3.1402865 |
| C  | -3.7975357 | 0.0995113  | 2.9848527  |
| H  | -3.8130660 | 1.1272439  | 3.3650005  |
| H  | -4.4810548 | -0.4873113 | 3.6106317  |
| H  | -2.7858820 | -0.2834162 | 3.1402865  |
| C  | -7.6184200 | -0.0283067 | 0.0000000  |
| N  | -8.7935601 | -0.0624516 | 0.0000000  |

**Complex 51** ( $X=CN$ ,  $Y=SO_2CN$ )

|   |           |           |            |
|---|-----------|-----------|------------|
| C | 5.7815659 | 0.2661314 | 0.0000000  |
| C | 5.1060894 | 0.2346334 | 1.2206581  |
| C | 3.7144052 | 0.1820770 | 1.1987728  |
| C | 2.9860944 | 0.1552438 | 0.0000000  |
| C | 3.7144052 | 0.1820770 | -1.1987728 |
| C | 5.1060894 | 0.2346334 | -1.2206581 |
| H | 5.6627528 | 0.2635919 | 2.1505954  |
| H | 3.1871572 | 0.1566638 | 2.1493932  |

|    |            |            |            |
|----|------------|------------|------------|
| H  | 3.1871572  | 0.1566638  | -2.1493932 |
| H  | 5.6627528  | 0.2635919  | -2.1505954 |
| Sn | 0.7930479  | 0.1318053  | 0.0000000  |
| H  | 0.5083352  | -0.6764512 | 1.4491416  |
| H  | 0.4493027  | 1.7791276  | 0.0000000  |
| H  | 0.5083352  | -0.6764512 | -1.4491416 |
| S  | 7.5182138  | 0.3082901  | 0.0000000  |
| O  | 8.0105553  | 0.8004765  | 1.2538432  |
| O  | 8.0105553  | 0.8004765  | -1.2538432 |
| C  | 7.8832799  | -1.4149473 | 0.0000000  |
| N  | 8.1521872  | -2.5593004 | 0.0000000  |
| Sn | -2.6999093 | 0.0257986  | 0.0000000  |
| C  | -4.1350422 | -0.0164345 | 1.5293141  |
| C  | -5.4947710 | -0.0853170 | 1.2637535  |
| H  | -6.1826252 | -0.1292794 | 2.1156072  |
| C  | -6.1178259 | -0.1166462 | 0.0000000  |
| C  | -5.4947710 | -0.0853170 | -1.2637535 |
| H  | -6.1826252 | -0.1292794 | -2.1156072 |
| C  | -4.1350422 | -0.0164345 | -1.5293141 |
| C  | -3.7314634 | 0.0390943  | -2.9865323 |
| H  | -4.3778148 | -0.5931272 | -3.6073035 |
| H  | -3.8096647 | 1.0607978  | -3.3750319 |
| H  | -2.6987013 | -0.2837020 | -3.1389738 |
| C  | -3.7314634 | 0.0390943  | 2.9865323  |
| H  | -3.8096647 | 1.0607978  | 3.3750319  |
| H  | -4.3778148 | -0.5931272 | 3.6073035  |
| H  | -2.6987013 | -0.2837020 | 3.1389738  |
| C  | -7.5454872 | -0.2052201 | 0.0000000  |
| N  | -8.7188943 | -0.2763293 | 0.0000000  |

**Complex 52** (X= CN, Y=tBu)

|    |            |            |            |
|----|------------|------------|------------|
| C  | 4.5428397  | 0.0355951  | 0.0000000  |
| C  | 3.8120134  | 0.0239260  | 1.1945346  |
| C  | 2.4171586  | 0.0159992  | 1.1909883  |
| C  | 1.6810812  | 0.0157798  | 0.0000000  |
| C  | 2.4171586  | 0.0159992  | -1.1909883 |
| C  | 3.8120134  | 0.0239260  | -1.1945346 |
| H  | 4.3271424  | 0.0235190  | 2.1486072  |
| H  | 1.8999087  | 0.0056827  | 2.1477334  |
| H  | 1.8999087  | 0.0056827  | -2.1477334 |
| H  | 4.3271424  | 0.0235190  | -2.1486072 |
| Sn | -0.4749071 | 0.0535399  | 0.0000000  |
| H  | -0.8956076 | -0.7417434 | 1.4238881  |
| H  | -0.8950380 | 1.6845762  | 0.0000000  |
| H  | -0.8956076 | -0.7417434 | -1.4238881 |
| C  | 6.0643562  | -0.0176127 | 0.0000000  |
| C  | 6.6506397  | 0.6688406  | 1.2354186  |
| H  | 6.3889666  | 0.1482257  | 2.1578115  |
| H  | 7.7419924  | 0.6799415  | 1.1661658  |
| H  | 6.3004133  | 1.7010798  | 1.3143681  |
| C  | 6.6506397  | 0.6688406  | -1.2354186 |
| H  | 7.7419924  | 0.6799415  | -1.1661658 |
| H  | 6.3889666  | 0.1482257  | -2.1578115 |
| H  | 6.3004133  | 1.7010798  | -1.3143681 |
| C  | 6.4950470  | -1.4892968 | 0.0000000  |
| H  | 6.1081110  | -2.0028875 | -0.8836329 |
| H  | 7.5869649  | -1.5724431 | 0.0000000  |
| H  | 6.1081110  | -2.0028875 | 0.8836329  |
| Sn | -4.2693147 | 0.0351359  | 0.0000000  |
| C  | -5.7223119 | 0.0185796  | 1.5241506  |
| C  | -7.0836457 | -0.0293482 | 1.2629873  |
| H  | -7.7713802 | -0.0621449 | 2.1160806  |

|   |             |            |            |
|---|-------------|------------|------------|
| C | -7.7095325  | -0.0518065 | 0.0000000  |
| C | -7.0836457  | -0.0293482 | -1.2629873 |
| H | -7.7713802  | -0.0621449 | -2.1160806 |
| C | -5.7223119  | 0.0185796  | -1.5241506 |
| C | -5.3178915  | 0.0704866  | -2.9818409 |
| H | -5.9832670  | -0.5371059 | -3.6078638 |
| H | -5.3626454  | 1.0966228  | -3.3646365 |
| H | -4.2951557  | -0.2829202 | -3.1355836 |
| C | -5.3178915  | 0.0704866  | 2.9818409  |
| H | -5.3626454  | 1.0966228  | 3.3646365  |
| H | -5.9832670  | -0.5371059 | 3.6078638  |
| H | -4.2951557  | -0.2829202 | 3.1355836  |
| C | -9.1377899  | -0.1176818 | 0.0000000  |
| N | -10.3125886 | -0.1692932 | 0.0000000  |

**Complex 53** ( $X=CN$ ,  $Y=NH_2$ )

|    |           |            |            |
|----|-----------|------------|------------|
| C  | 6.4785502 | -0.0493162 | 0.0000000  |
| C  | 5.7636372 | -0.0532205 | 1.2000600  |
| C  | 4.3703643 | -0.0482201 | 1.1927687  |
| C  | 3.6354890 | -0.0450006 | 0.0000000  |
| C  | 4.3703643 | -0.0482201 | -1.1927687 |
| C  | 5.7636372 | -0.0532205 | -1.2000600 |
| H  | 6.3036068 | -0.0615683 | 2.1437002  |
| H  | 3.8525636 | -0.0536957 | 2.1489058  |
| H  | 3.8525636 | -0.0536957 | -2.1489058 |
| H  | 6.3036068 | -0.0615683 | -2.1437002 |
| Sn | 1.4849071 | 0.0047782  | 0.0000000  |
| H  | 1.0493527 | -0.7877817 | 1.4215571  |
| H  | 1.0599202 | 1.6354271  | 0.0000000  |
| H  | 1.0493527 | -0.7877817 | -1.4215571 |
| N  | 7.8835699 | -0.1211864 | 0.0000000  |

|    |            |            |            |
|----|------------|------------|------------|
| H  | 8.2949265  | 0.2875982  | -0.8288411 |
| H  | 8.2949265  | 0.2875982  | 0.8288411  |
| Sn | -2.3406634 | 0.0118300  | 0.0000000  |
| C  | -3.7950954 | 0.0017215  | 1.5244169  |
| C  | -5.1567452 | -0.0387366 | 1.2633136  |
| H  | -5.8452742 | -0.0680046 | 2.1160859  |
| C  | -5.7825745 | -0.0572526 | 0.0000000  |
| C  | -5.1567452 | -0.0387366 | -1.2633136 |
| H  | -5.8452742 | -0.0680046 | -2.1160859 |
| C  | -3.7950954 | 0.0017215  | -1.5244169 |
| C  | -3.3903475 | 0.0506943  | -2.9824497 |
| H  | -4.0519554 | -0.5626261 | -3.6070242 |
| H  | -3.4402388 | 1.0753753  | -3.3689400 |
| H  | -2.3656074 | -0.2977735 | -3.1344488 |
| C  | -3.3903475 | 0.0506943  | 2.9824497  |
| H  | -3.4402388 | 1.0753753  | 3.3689400  |
| H  | -4.0519554 | -0.5626261 | 3.6070242  |
| H  | -2.3656074 | -0.2977735 | 3.1344488  |
| C  | -7.2111767 | -0.1124062 | 0.0000000  |
| N  | -8.3863965 | -0.1543978 | 0.0000000  |

**Complex 54** ( $X=CN$ ,  $Y=NMe_2$ )

|   |           |            |            |
|---|-----------|------------|------------|
| C | 5.2162050 | -0.1585091 | 0.0000000  |
| C | 4.4834601 | -0.1457643 | 1.1994940  |
| C | 3.0901723 | -0.1426348 | 1.1878686  |
| C | 2.3501428 | -0.1399708 | 0.0000000  |
| C | 3.0901723 | -0.1426348 | -1.1878686 |
| C | 4.4834601 | -0.1457643 | -1.1994940 |
| H | 4.9914438 | -0.1454971 | 2.1552176  |
| H | 2.5771938 | -0.1413364 | 2.1469124  |
| H | 2.5771938 | -0.1413364 | -2.1469124 |

|    |            |            |            |
|----|------------|------------|------------|
| H  | 4.9914438  | -0.1454971 | -2.1552176 |
| Sn | 0.2009821  | -0.0828162 | 0.0000000  |
| H  | -0.2423628 | -0.8729326 | 1.4202640  |
| H  | -0.2231415 | 1.5480034  | 0.0000000  |
| H  | -0.2423628 | -0.8729326 | -1.4202640 |
| N  | 6.6173348  | -0.2106348 | 0.0000000  |
| C  | 7.2749399  | 0.2286904  | 1.2147679  |
| H  | 7.0185695  | -0.4233626 | 2.0496223  |
| H  | 8.3532520  | 0.1661867  | 1.0701211  |
| H  | 7.0146780  | 1.2616592  | 1.4918005  |
| C  | 7.2749399  | 0.2286904  | -1.2147679 |
| H  | 7.0185695  | -0.4233626 | -2.0496223 |
| H  | 7.0146780  | 1.2616592  | -1.4918005 |
| H  | 8.3532520  | 0.1661867  | -1.0701211 |
| Sn | -3.6438613 | -0.0636412 | 0.0000000  |
| C  | -5.0993848 | -0.0411177 | 1.5237586  |
| C  | -6.4615142 | -0.0536245 | 1.2628496  |
| H  | -7.1495008 | -0.0705214 | 2.1163211  |
| C  | -7.0882464 | -0.0592455 | 0.0000000  |
| C  | -6.4615142 | -0.0536245 | -1.2628496 |
| H  | -7.1495008 | -0.0705214 | -2.1163211 |
| C  | -5.0993848 | -0.0411177 | -1.5237586 |
| C  | -4.6939305 | 0.0007328  | -2.9815187 |
| H  | -5.4019346 | -0.5495150 | -3.6140488 |
| H  | -4.6653429 | 1.0323142  | -3.3508810 |
| H  | -3.6989597 | -0.4222209 | -3.1421010 |
| C  | -4.6939305 | 0.0007328  | 2.9815187  |
| H  | -4.6653429 | 1.0323142  | 3.3508810  |
| H  | -5.4019346 | -0.5495150 | 3.6140488  |
| H  | -3.6989597 | -0.4222209 | 3.1421010  |
| C  | -8.5175719 | -0.0875942 | 0.0000000  |



N -9.6934016 -0.1077034 0.0000000

**Complex 55** ( $X= P(CN)_2$ ,  $Y=H$ )

C 7.6359225 0.1065467 0.0000000

C 6.9347996 0.0903911 1.2041639

C 5.5399242 0.0619757 1.1981289

C 4.8126674 0.0487681 0.0000000

C 5.5399242 0.0619757 -1.1981289

C 6.9347996 0.0903911 -1.2041639

H 7.4739248 0.0981043 2.1462111

H 5.0142973 0.0425088 2.1497089

H 5.0142973 0.0425088 -2.1497089

H 7.4739248 0.0981043 -2.1462111

Sn 2.6576393 0.0278708 0.0000000

H 2.2529125 -0.7796651 1.4219036

H 2.1771623 1.6422335 0.0000000

H 2.2529125 -0.7796651 -1.4219036

H 8.7205998 0.1277013 0.0000000

Sn -1.1497104 -0.1224384 0.0000000

C -2.6046171 -0.1869883 1.5240607

C -3.9676278 -0.2701893 1.2628954

H -4.6392744 -0.3182901 2.1301174

C -4.5844574 -0.2898449 0.0000000

C -3.9676278 -0.2701893 -1.2628954

H -4.6392744 -0.3182901 -2.1301174

C -2.6046171 -0.1869883 -1.5240607

C -2.2049658 -0.1242258 -2.9822496

H -2.8505963 -0.7544679 -3.6066950

H -2.2852560 0.8989989 -3.3664822

H -1.1712242 -0.4439933 -3.1355878

C -2.2049658 -0.1242258 2.9822496

|   |            |            |            |
|---|------------|------------|------------|
| H | -2.2852560 | 0.8989989  | 3.3664822  |
| H | -2.8505963 | -0.7544679 | 3.6066950  |
| H | -1.1712242 | -0.4439933 | 3.1355878  |
| C | -6.9877431 | 0.3515805  | 1.3139748  |
| N | -7.4637229 | 0.9078578  | 2.2344627  |
| C | -6.9877431 | 0.3515805  | -1.3139748 |
| N | -7.4637229 | 0.9078578  | -2.2344627 |
| P | -6.3514854 | -0.6880316 | 0.0000000  |

**Complex 56** ( $X = P(CN)_2$ ,  $Y = F$ )

|    |            |            |            |
|----|------------|------------|------------|
| C  | 7.5969406  | 0.0819381  | 0.0000000  |
| C  | 6.9268499  | 0.0686134  | 1.2115119  |
| C  | 5.5315079  | 0.0441502  | 1.1966668  |
| C  | 4.8021883  | 0.0327962  | 0.0000000  |
| C  | 5.5315079  | 0.0441502  | -1.1966668 |
| C  | 6.9268499  | 0.0686134  | -1.2115119 |
| H  | 7.4913821  | 0.0753681  | 2.1367798  |
| H  | 5.0102045  | 0.0266523  | 2.1500667  |
| H  | 5.0102045  | 0.0266523  | -2.1500667 |
| H  | 7.4913821  | 0.0753681  | -2.1367798 |
| Sn | 2.6442650  | 0.0194452  | 0.0000000  |
| H  | 2.2456238  | -0.7874830 | 1.4229933  |
| H  | 2.1783529  | 1.6372584  | 0.0000000  |
| H  | 2.2456238  | -0.7874830 | -1.4229933 |
| F  | 8.9500319  | 0.1041848  | 0.0000000  |
| Sn | -1.1566086 | -0.1203182 | 0.0000000  |
| C  | -2.6115378 | -0.1792235 | 1.5236656  |
| C  | -3.9749245 | -0.2578402 | 1.2626099  |
| H  | -4.6462505 | -0.3035003 | 2.1301667  |
| C  | -4.5922158 | -0.2756299 | 0.0000000  |
| C  | -3.9749245 | -0.2578402 | -1.2626099 |

H -4.6462505 -0.3035003 -2.1301667  
C -2.6115378 -0.1792235 -1.5236656  
C -2.2123622 -0.1171719 -2.9818922  
H -2.8607813 -0.7447905 -3.6059798  
H -2.2894460 0.9065347 -3.3653701  
H -1.1798632 -0.4404556 -3.1359988  
C -2.2123622 -0.1171719 2.9818922  
H -2.2894460 0.9065347 3.3653701  
H -2.8607813 -0.7447905 3.6059798  
H -1.1798632 -0.4404556 3.1359988  
C -6.9935240 0.3728827 1.3141136  
N -7.4679655 0.9306732 2.2344650  
C -6.9935240 0.3728827 -1.3141136  
N -7.4679655 0.9306732 -2.2344650  
P -6.3607805 -0.6684937 0.0000000

**Complex 57** ( $X = P(CN)_2$ ,  $Y = CF_3$ )

C 6.8113665 0.0728355 0.0000000  
C 6.1178475 0.0513867 1.2086618  
C 4.7249277 0.0203484 1.1965416  
C 3.9954585 0.0057457 0.0000000  
C 4.7249277 0.0203484 -1.1965416  
C 6.1178475 0.0513867 -1.2086618  
H 6.6617636 0.0660727 2.1463588  
H 4.2012665 0.0019359 2.1489129  
H 4.2012665 0.0019359 -2.1489129  
H 6.6617636 0.0660727 -2.1463588  
Sn 1.8279846 -0.0029291 0.0000000  
H 1.4592037 -0.8097016 1.4308481  
H 1.4036166 1.6257399 0.0000000  
H 1.4592037 -0.8097016 -1.4308481

|    |            |            |            |
|----|------------|------------|------------|
| C  | 8.3054461  | 0.0541901  | 0.0000000  |
| F  | 8.7936077  | -1.2043644 | 0.0000000  |
| F  | 8.8255319  | 0.6619644  | 1.0805040  |
| F  | 8.8255319  | 0.6619644  | -1.0805040 |
| Sn | -1.8553446 | -0.1179997 | 0.0000000  |
| C  | -3.3049362 | -0.1721648 | 1.5251237  |
| C  | -4.6679791 | -0.2507391 | 1.2628042  |
| H  | -5.3392419 | -0.2949285 | 2.1302271  |
| C  | -5.2847064 | -0.2698850 | 0.0000000  |
| C  | -4.6679791 | -0.2507391 | -1.2628042 |
| H  | -5.3392419 | -0.2949285 | -2.1302271 |
| C  | -3.3049362 | -0.1721648 | -1.5251237 |
| C  | -2.9044859 | -0.1040291 | -2.9824086 |
| H  | -3.5715405 | -0.7039885 | -3.6138634 |
| H  | -2.9511498 | 0.9263627  | -3.3522965 |
| H  | -1.8819335 | -0.4552803 | -3.1415109 |
| C  | -2.9044859 | -0.1040291 | 2.9824086  |
| H  | -2.9511498 | 0.9263627  | 3.3522965  |
| H  | -3.5715405 | -0.7039885 | 3.6138634  |
| H  | -1.8819335 | -0.4552803 | 3.1415109  |
| C  | -7.6844942 | 0.3776194  | 1.3146319  |
| N  | -8.1567055 | 0.9352714  | 2.2362082  |
| C  | -7.6844942 | 0.3776194  | -1.3146319 |
| N  | -8.1567055 | 0.9352714  | -2.2362082 |
| P  | -7.0535773 | -0.6635925 | 0.0000000  |

**Complex 58** ( $X = P(CN)_2$ ,  $Y = CN$ )

|   |           |           |           |
|---|-----------|-----------|-----------|
| C | 7.2517067 | 0.0671567 | 0.0000000 |
| C | 6.5541129 | 0.0526303 | 1.2131843 |
| C | 5.1623580 | 0.0277315 | 1.1974474 |
| C | 4.4328781 | 0.0164066 | 0.0000000 |

|    |            |            |            |
|----|------------|------------|------------|
| C  | 5.1623580  | 0.0277315  | -1.1974474 |
| C  | 6.5541129  | 0.0526303  | -1.2131843 |
| H  | 7.1043724  | 0.0602309  | 2.1479353  |
| H  | 4.6375727  | 0.0099737  | 2.1493430  |
| H  | 4.6375727  | 0.0099737  | -2.1493430 |
| H  | 7.1043724  | 0.0602309  | -2.1479353 |
| Sn | 2.2604145  | 0.0043034  | 0.0000000  |
| H  | 1.9106514  | -0.8044054 | 1.4345066  |
| H  | 1.8488653  | 1.6359741  | 0.0000000  |
| H  | 1.9106514  | -0.8044054 | -1.4345066 |
| C  | 8.6820461  | 0.0930404  | 0.0000000  |
| N  | 9.8550423  | 0.1150338  | 0.0000000  |
| Sn | -1.3797069 | -0.1179684 | 0.0000000  |
| C  | -2.8262599 | -0.1726400 | 1.5260680  |
| C  | -4.1889320 | -0.2539583 | 1.2628812  |
| H  | -4.8603105 | -0.2979365 | 2.1300116  |
| C  | -4.8052950 | -0.2756783 | 0.0000000  |
| C  | -4.1889320 | -0.2539583 | -1.2628812 |
| H  | -4.8603105 | -0.2979365 | -2.1300116 |
| C  | -2.8262599 | -0.1726400 | -1.5260680 |
| C  | -2.4260044 | -0.1022769 | -2.9832360 |
| H  | -3.0859979 | -0.7108986 | -3.6136898 |
| H  | -2.4845929 | 0.9269330  | -3.3547202 |
| H  | -1.3995846 | -0.4424191 | -3.1414934 |
| C  | -2.4260044 | -0.1022769 | 2.9832360  |
| H  | -2.4845929 | 0.9269330  | 3.3547202  |
| H  | -3.0859979 | -0.7108986 | 3.6136898  |
| H  | -1.3995846 | -0.4424191 | 3.1414934  |
| C  | -7.2063581 | 0.3605807  | 1.3154077  |
| N  | -7.6776683 | 0.9161026  | 2.2387147  |
| C  | -7.2063581 | 0.3605807  | -1.3154077 |

N -7.6776683 0.9161026 -2.2387147  
P -6.5726687 -0.6775641 0.0000000

**Complex 59** ( $X=P(CN)_2$ ,  $Y=P(CN)_2$ )

C 6.4716336 -0.4669845 0.0000000  
C 5.7773845 -0.4115726 1.2115885  
C 4.3892771 -0.2804437 1.1958410  
C 3.6615342 -0.2127635 0.0000000  
C 4.3892771 -0.2804437 -1.1958410  
C 5.7773845 -0.4115726 -1.2115885  
H 6.3099469 -0.4526293 2.1575627  
H 3.8689181 -0.2341751 2.1495740  
H 3.8689181 -0.2341751 -2.1495740  
H 6.3099469 -0.4526293 -2.1575627  
Sn 1.4967255 0.0107922 0.0000000  
H 1.0791974 -0.7563155 1.4388549  
H 1.2710101 1.6782196 0.0000000  
H 1.0791974 -0.7563155 -1.4388549  
P 8.2540274 -0.8377410 0.0000000  
C 8.7967163 0.2194231 1.3294166  
N 9.1854808 0.7956922 2.2774432  
C 8.7967163 0.2194231 -1.3294166  
N 9.1854808 0.7956922 -2.2774432  
Sn -2.1043965 0.2370804 0.0000000  
C -3.5491967 0.2850664 1.5267351  
C -4.9141819 0.3030414 1.2631269  
H -5.5874622 0.2975264 2.1297922  
C -5.5303025 0.2972901 0.0000000  
C -4.9141819 0.3030414 -1.2631269  
H -5.5874622 0.2975264 -2.1297922  
C -3.5491967 0.2850664 -1.5267351

|   |            |            |            |
|---|------------|------------|------------|
| C | -3.1473643 | 0.3024435  | -2.9855304 |
| H | -3.8287949 | -0.2998628 | -3.5982309 |
| H | -3.1694667 | 1.3230826  | -3.3845196 |
| H | -2.1342981 | -0.0784640 | -3.1356022 |
| C | -3.1473643 | 0.3024435  | 2.9855304  |
| H | -3.1694667 | 1.3230826  | 3.3845196  |
| H | -3.8287949 | -0.2998628 | 3.5982309  |
| H | -2.1342981 | -0.0784640 | 3.1356022  |
| P | -7.3244002 | 0.5579693  | 0.0000000  |
| C | -7.8741505 | -0.5268421 | 1.3152791  |
| N | -8.2999215 | -1.1179017 | 2.2386833  |
| C | -7.8741505 | -0.5268421 | -1.3152791 |
| N | -8.2999215 | -1.1179017 | -2.2386833 |

**Complex 60** ( $X=P(CN)_2$ ,  $Y=SO_2CN$ )

|    |           |            |            |
|----|-----------|------------|------------|
| C  | 6.4657289 | 0.1493782  | 0.0000000  |
| C  | 5.7894135 | 0.1494168  | 1.2204502  |
| C  | 4.3967919 | 0.1590447  | 1.1990153  |
| C  | 3.6686060 | 0.1632381  | 0.0000000  |
| C  | 4.3967919 | 0.1590447  | -1.1990153 |
| C  | 5.7894135 | 0.1494168  | -1.2204502 |
| H  | 6.3461692 | 0.1543882  | 2.1506822  |
| H  | 3.8691750 | 0.1582917  | 2.1495505  |
| H  | 3.8691750 | 0.1582917  | -2.1495505 |
| H  | 6.3461692 | 0.1543882  | -2.1506822 |
| Sn | 1.4819463 | 0.2199948  | 0.0000000  |
| H  | 1.1470737 | -0.5775297 | 1.4438712  |
| H  | 1.1745850 | 1.8745221  | 0.0000000  |
| H  | 1.1470737 | -0.5775297 | -1.4438712 |
| S  | 8.2033874 | 0.1139259  | 0.0000000  |
| O  | 8.7162251 | 0.5842973  | 1.2538187  |

O 8.7162251 0.5842973 -1.2538187  
C 8.4896577 -1.6237584 0.0000000  
N 8.7041725 -2.7795736 0.0000000  
Sn -2.0549029 0.2381676 0.0000000  
C -3.4956483 0.2494893 1.5277367  
C -4.8604708 0.2298011 1.2632496  
H -5.5335324 0.2068355 2.1296654  
C -5.4759270 0.2067153 0.0000000  
C -4.8604708 0.2298011 -1.2632496  
H -5.5335324 0.2068355 -2.1296654  
C -3.4956483 0.2494893 -1.5277367  
C -3.0932166 0.2790969 -2.9860121  
H -3.7329244 -0.3718859 -3.5935912  
H -3.1807390 1.2924221 -3.3946389  
H -2.0576547 -0.0376252 -3.1308885  
C -3.0932166 0.2790969 2.9860121  
H -3.1807390 1.2924221 3.3946389  
H -3.7329244 -0.3718859 3.5935912  
H -2.0576547 -0.0376252 3.1308885  
P -7.2773323 0.4175663 0.0000000  
C -7.7957756 -0.6817913 1.3153826  
N -8.2048475 -1.2843396 2.2389504  
C -7.7957756 -0.6817913 -1.3153826  
N -8.2048475 -1.2843396 -2.2389504

**Complex 61** ( $X = P(CN)_2$ ,  $Y = tBu$ )

C 5.2051251 0.1007161 0.0000000  
C 4.4754003 0.0679838 1.1947332  
C 3.0815845 0.0186658 1.1915544  
C 2.3469361 -0.0037565 0.0000000  
C 3.0815845 0.0186658 -1.1915544



|    |            |            |            |
|----|------------|------------|------------|
| C  | 4.4754003  | 0.0679838  | -1.1947332 |
| H  | 4.9906450  | 0.0835531  | 2.1485242  |
| H  | 2.5646190  | -0.0062798 | 2.1481693  |
| H  | 2.5646190  | -0.0062798 | -2.1481693 |
| H  | 4.9906450  | 0.0835531  | -2.1485242 |
| Sn | 0.1945353  | -0.0325418 | 0.0000000  |
| H  | -0.2114316 | -0.8405271 | 1.4212195  |
| H  | -0.2872439 | 1.5814094  | 0.0000000  |
| H  | -0.2114316 | -0.8405271 | -1.4212195 |
| C  | 6.7272727  | 0.0919118  | 0.0000000  |
| C  | 7.2923456  | 0.7948054  | 1.2360232  |
| H  | 7.0433065  | 0.2674919  | 2.1581153  |
| H  | 8.3830447  | 0.8355909  | 1.1695543  |
| H  | 6.9138395  | 1.8171121  | 1.3140009  |
| C  | 7.2923456  | 0.7948054  | -1.2360232 |
| H  | 8.3830447  | 0.8355909  | -1.1695543 |
| H  | 7.0433065  | 0.2674919  | -2.1581153 |
| H  | 6.9138395  | 1.8171121  | -1.3140009 |
| C  | 7.1997860  | -1.3668898 | 0.0000000  |
| H  | 6.8276600  | -1.8914362 | -0.8835379 |
| H  | 8.2935575  | -1.4188997 | 0.0000000  |
| H  | 6.8276600  | -1.8914362 | 0.8835379  |
| Sn | -3.6233361 | -0.1733482 | 0.0000000  |
| C  | -5.0799493 | -0.2151181 | 1.5237457  |
| C  | -6.4438512 | -0.2839221 | 1.2628078  |
| H  | -7.1156273 | -0.3221919 | 2.1304871  |
| C  | -7.0609181 | -0.2989836 | 0.0000000  |
| C  | -6.4438512 | -0.2839221 | -1.2628078 |
| H  | -7.1156273 | -0.3221919 | -2.1304871 |
| C  | -5.0799493 | -0.2151181 | -1.5237457 |
| C  | -4.6812518 | -0.1480813 | -2.9819756 |

|   |            |            |            |
|---|------------|------------|------------|
| H | -5.3418953 | -0.7583523 | -3.6105620 |
| H | -4.7402605 | 0.8802327  | -3.3563763 |
| H | -3.6548122 | -0.4880662 | -3.1408835 |
| C | -4.6812518 | -0.1480813 | 2.9819756  |
| H | -4.7402605 | 0.8802327  | 3.3563763  |
| H | -5.3418953 | -0.7583523 | 3.6105620  |
| H | -3.6548122 | -0.4880662 | 3.1408835  |
| P | -8.8312971 | -0.6808148 | 0.0000000  |
| C | -9.4574945 | 0.3644893  | 1.3144174  |
| N | -9.9280801 | 0.9246488  | 2.2353785  |
| C | -9.4574945 | 0.3644893  | -1.3144174 |
| N | -9.9280801 | 0.9246488  | -2.2353785 |

**Complex 62** ( $X=P(CN)_2$ ,  $Y=NH_2$ )

|    |           |            |            |
|----|-----------|------------|------------|
| C  | 7.1498612 | 0.0832384  | 0.0000000  |
| C  | 6.4356958 | 0.0533268  | 1.2001325  |
| C  | 5.0432545 | 0.0102868  | 1.1932020  |
| C  | 4.3095240 | -0.0112283 | 0.0000000  |
| C  | 5.0432545 | 0.0102868  | -1.1932020 |
| C  | 6.4356958 | 0.0533268  | -1.2001325 |
| H  | 6.9761332 | 0.0636718  | 2.1433650  |
| H  | 4.5258753 | -0.0139172 | 2.1493090  |
| H  | 4.5258753 | -0.0139172 | -2.1493090 |
| H  | 6.9761332 | 0.0636718  | -2.1433650 |
| Sn | 2.1616248 | -0.0340530 | 0.0000000  |
| H  | 1.7463766 | -0.8418221 | 1.4192570  |
| H  | 1.6713917 | 1.5781211  | 0.0000000  |
| H  | 1.7463766 | -0.8418221 | -1.4192570 |
| N  | 8.5562222 | 0.0629739  | 0.0000000  |
| H  | 8.9525582 | 0.4861872  | -0.8288769 |
| H  | 8.9525582 | 0.4861872  | 0.8288769  |

|    |            |            |            |
|----|------------|------------|------------|
| Sn | -1.6617400 | -0.1517828 | 0.0000000  |
| C  | -3.1183727 | -0.2041875 | 1.5232521  |
| C  | -4.4818230 | -0.2808048 | 1.2627989  |
| H  | -5.1532780 | -0.3246774 | 2.1304188  |
| C  | -5.0989764 | -0.2984395 | 0.0000000  |
| C  | -4.4818230 | -0.2808048 | -1.2627989 |
| H  | -5.1532780 | -0.3246774 | -2.1304188 |
| C  | -3.1183727 | -0.2041875 | -1.5232521 |
| C  | -2.7178499 | -0.1384209 | -2.9809285 |
| H  | -3.3732284 | -0.7544809 | -3.6094260 |
| H  | -2.7822564 | 0.8884730  | -3.3582277 |
| H  | -1.6889009 | -0.4725523 | -3.1362547 |
| C  | -2.7178499 | -0.1384209 | 2.9809285  |
| H  | -2.7822564 | 0.8884730  | 3.3582277  |
| H  | -3.3732284 | -0.7544809 | 3.6094260  |
| H  | -1.6889009 | -0.4725523 | 3.1362547  |
| C  | -7.5000555 | 0.3510027  | 1.3139709  |
| N  | -7.9746439 | 0.9088938  | 2.2342191  |
| C  | -7.5000555 | 0.3510027  | -1.3139709 |
| N  | -7.9746439 | 0.9088938  | -2.2342191 |
| P  | -6.8668774 | -0.6907876 | 0.0000000  |

**Complex 63** ( $X = P(CN)_2$ ,  $Y = NMe_2$ )

|   |           |            |            |
|---|-----------|------------|------------|
| C | 5.9028311 | -0.0600996 | 0.0000000  |
| C | 5.1701311 | -0.0833966 | 1.1994585  |
| C | 3.7783092 | -0.1450563 | 1.1881507  |
| C | 3.0394956 | -0.1756142 | 0.0000000  |
| C | 3.7783092 | -0.1450563 | -1.1881507 |
| C | 5.1701311 | -0.0833966 | -1.1994585 |
| H | 5.6772370 | -0.0588556 | 2.1552220  |
| H | 3.2657215 | -0.1679449 | 2.1470695  |

|    |            |            |            |
|----|------------|------------|------------|
| H  | 3.2657215  | -0.1679449 | -2.1470695 |
| H  | 5.6772370  | -0.0588556 | -2.1552220 |
| Sn | 0.8928201  | -0.2003327 | 0.0000000  |
| H  | 0.4677580  | -1.0062738 | 1.4175415  |
| H  | 0.4014364  | 1.4115941  | 0.0000000  |
| H  | 0.4677580  | -1.0062738 | -1.4175415 |
| N  | 7.3047472  | -0.0426284 | 0.0000000  |
| C  | 7.9398754  | 0.4321438  | 1.2136297  |
| H  | 7.7127389  | -0.2266736 | 2.0514153  |
| H  | 9.0201210  | 0.4183076  | 1.0701901  |
| H  | 7.6325395  | 1.4538155  | 1.4842663  |
| C  | 7.9398754  | 0.4321438  | -1.2136297 |
| H  | 9.0201210  | 0.4183076  | -1.0701901 |
| H  | 7.7127389  | -0.2266736 | -2.0514153 |
| H  | 7.6325395  | 1.4538155  | -1.4842663 |
| Sn | -2.9794983 | -0.2882038 | 0.0000000  |
| C  | -4.4392866 | -0.2886419 | 1.5223902  |
| C  | -5.8046725 | -0.3199301 | 1.2624695  |
| H  | -6.4767618 | -0.3404729 | 2.1305070  |
| C  | -6.4226631 | -0.3183245 | 0.0000000  |
| C  | -5.8046725 | -0.3199301 | -1.2624695 |
| H  | -6.4767618 | -0.3404729 | -2.1305070 |
| C  | -4.4392866 | -0.2886419 | -1.5223902 |
| C  | -4.0367827 | -0.2324634 | -2.9796326 |
| H  | -4.7317014 | -0.7965157 | -3.6145273 |
| H  | -4.0338270 | 0.8009899  | -3.3442002 |
| H  | -3.0318258 | -0.6307953 | -3.1406750 |
| C  | -4.0367827 | -0.2324634 | 2.9796326  |
| H  | -4.0338270 | 0.8009899  | 3.3442002  |
| H  | -4.7317014 | -0.7965157 | 3.6145273  |
| H  | -3.0318258 | -0.6307953 | 3.1406750  |

|   |            |            |            |
|---|------------|------------|------------|
| C | -8.8077201 | 0.3950149  | 1.3135636  |
| N | -9.2713315 | 0.9648113  | 2.2321084  |
| C | -8.8077201 | 0.3950149  | -1.3135636 |
| N | -9.2713315 | 0.9648113  | -2.2321084 |
| P | -8.2002133 | -0.6625167 | 0.0000000  |

**Complex 64** ( $X=SO_2CN$ ,  $Y=H$ )

|    |            |            |            |
|----|------------|------------|------------|
| C  | 7.5593910  | -0.3975219 | 0.0000000  |
| C  | 6.8612209  | -0.3339775 | 1.2043259  |
| C  | 5.4725417  | -0.2024847 | 1.1986347  |
| C  | 4.7498252  | -0.1316630 | 0.0000000  |
| C  | 5.4725417  | -0.2024847 | -1.1986347 |
| C  | 6.8612209  | -0.3339775 | -1.2043259 |
| H  | 7.3973694  | -0.3886850 | 2.1464861  |
| H  | 4.9476176  | -0.1627999 | 2.1498781  |
| H  | 4.9476176  | -0.1627999 | -2.1498781 |
| H  | 7.3973694  | -0.3886850 | -2.1464861 |
| Sn | 2.6122413  | 0.1030570  | 0.0000000  |
| H  | 2.0988612  | -0.6460984 | 1.4189329  |
| H  | 2.3177251  | 1.7622984  | 0.0000000  |
| H  | 2.0988612  | -0.6460984 | -1.4189329 |
| H  | 8.6393123  | -0.5003721 | 0.0000000  |
| Sn | -1.2189870 | 0.3823826  | 0.0000000  |
| C  | -2.6697064 | 0.3642163  | 1.5294139  |
| C  | -4.0271844 | 0.3067071  | 1.2712708  |
| H  | -4.7131795 | 0.2749917  | 2.1212970  |
| C  | -4.6400351 | 0.2951042  | 0.0000000  |
| C  | -4.0271844 | 0.3067071  | -1.2712708 |
| H  | -4.7131795 | 0.2749917  | -2.1212970 |
| C  | -2.6697064 | 0.3642163  | -1.5294139 |
| C  | -2.2551388 | 0.4162620  | -2.9833840 |

|   |            |            |            |
|---|------------|------------|------------|
| H | -3.0460283 | 0.0381792  | -3.6423680 |
| H | -2.0356539 | 1.4437960  | -3.2922475 |
| H | -1.3507057 | -0.1686301 | -3.1701784 |
| C | -2.2551388 | 0.4162620  | 2.9833840  |
| H | -2.0356539 | 1.4437960  | 3.2922475  |
| H | -3.0460283 | 0.0381792  | 3.6423680  |
| H | -1.3507057 | -0.1686301 | 3.1701784  |
| S | -6.3403273 | 0.1013326  | 0.0000000  |
| C | -6.5252359 | -1.6654731 | 0.0000000  |
| N | -6.6396307 | -2.8364561 | 0.0000000  |
| O | -6.9371534 | 0.5021791  | -1.2480805 |
| O | -6.9371534 | 0.5021791  | 1.2480805  |

**Complex 65** ( $X=SO_2CN$ ,  $Y=F$ )

|    |            |            |            |
|----|------------|------------|------------|
| C  | 7.5238299  | -0.3323442 | 0.0000000  |
| C  | 6.8560032  | -0.2768670 | 1.2116412  |
| C  | 5.4658282  | -0.1567260 | 1.1972284  |
| C  | 4.7403844  | -0.0919486 | 0.0000000  |
| C  | 5.4658282  | -0.1567260 | -1.1972284 |
| C  | 6.8560032  | -0.2768670 | -1.2116412 |
| H  | 7.4179140  | -0.3288968 | 2.1370413  |
| H  | 4.9454857  | -0.1207379 | 2.1505297  |
| H  | 4.9454857  | -0.1207379 | -2.1505297 |
| H  | 7.4179140  | -0.3288968 | -2.1370413 |
| Sn | 2.5983194  | 0.1257046  | 0.0000000  |
| H  | 2.0997097  | -0.6291649 | 1.4202983  |
| H  | 2.2976569  | 1.7830665  | 0.0000000  |
| H  | 2.0997097  | -0.6291649 | -1.4202983 |
| F  | 8.8714380  | -0.4490418 | 0.0000000  |
| Sn | -1.2295581 | 0.3722696  | 0.0000000  |
| C  | -2.6795407 | 0.3426180  | 1.5293883  |

|   |            |            |            |
|---|------------|------------|------------|
| C | -4.0366155 | 0.2736061  | 1.2710759  |
| H | -4.7222028 | 0.2358603  | 2.1212056  |
| C | -4.6492767 | 0.2568160  | 0.0000000  |
| C | -4.0366155 | 0.2736061  | -1.2710759 |
| H | -4.7222028 | 0.2358603  | -2.1212056 |
| C | -2.6795407 | 0.3426180  | -1.5293883 |
| C | -2.2656600 | 0.3983495  | -2.9833323 |
| H | -3.0536847 | 0.0141297  | -3.6421660 |
| H | -2.0546426 | 1.4277156  | -3.2920430 |
| H | -1.3565906 | -0.1792428 | -3.1702741 |
| C | -2.2656600 | 0.3983495  | 2.9833323  |
| H | -2.0546426 | 1.4277156  | 3.2920430  |
| H | -3.0536847 | 0.0141297  | 3.6421660  |
| H | -1.3565906 | -0.1792428 | 3.1702741  |
| S | -6.3486173 | 0.0498945  | 0.0000000  |
| C | -6.5177521 | -1.7183014 | 0.0000000  |
| N | -6.6222306 | -2.8901913 | 0.0000000  |
| O | -6.9481009 | 0.4463944  | -1.2481723 |
| O | -6.9481009 | 0.4463944  | 1.2481723  |

**Complex 66** ( $X=SO_2CN$ ,  $Y=CF_3$ )

|   |           |            |            |
|---|-----------|------------|------------|
| C | 6.7712900 | -0.1521701 | 0.0000000  |
| C | 6.0788287 | -0.1138399 | 1.2087205  |
| C | 4.6884553 | -0.0267557 | 1.1972511  |
| C | 3.9615574 | 0.0193229  | 0.0000000  |
| C | 4.6884553 | -0.0267557 | -1.1972511 |
| C | 6.0788287 | -0.1138399 | -1.2087205 |
| H | 6.6217809 | -0.1458927 | 2.1464318  |
| H | 4.1653888 | -0.0006216 | 2.1496169  |
| H | 4.1653888 | -0.0006216 | -2.1496169 |
| H | 6.6217809 | -0.1458927 | -2.1464318 |

|    |            |            |            |
|----|------------|------------|------------|
| Sn | 1.8066862  | 0.1840582  | 0.0000000  |
| H  | 1.3545628  | -0.5882936 | 1.4257406  |
| H  | 1.4907109  | 1.8378222  | 0.0000000  |
| H  | 1.3545628  | -0.5882936 | -1.4257406 |
| C  | 8.2583797  | -0.3007393 | 0.0000000  |
| F  | 8.6342275  | -1.5967642 | 0.0000000  |
| F  | 8.8283735  | 0.2596282  | 1.0806683  |
| F  | 8.8283735  | 0.2596282  | -1.0806683 |
| Sn | -1.9412904 | 0.3447794  | 0.0000000  |
| C  | -3.3874495 | 0.3132202  | 1.5302124  |
| C  | -4.7440538 | 0.2345942  | 1.2711271  |
| H  | -5.4298892 | 0.1946535  | 2.1208243  |
| C  | -5.3556236 | 0.2110278  | 0.0000000  |
| C  | -4.7440538 | 0.2345942  | -1.2711271 |
| H  | -5.4298892 | 0.1946535  | -2.1208243 |
| C  | -3.3874495 | 0.3132202  | -1.5302124 |
| C  | -2.9736145 | 0.3807831  | -2.9834589 |
| H  | -3.7566502 | -0.0087637 | -3.6449651 |
| H  | -2.7747781 | 1.4144135  | -3.2858398 |
| H  | -2.0577680 | -0.1850528 | -3.1729841 |
| C  | -2.9736145 | 0.3807831  | 2.9834589  |
| H  | -2.7747781 | 1.4144135  | 3.2858398  |
| H  | -3.7566502 | -0.0087637 | 3.6449651  |
| H  | -2.0577680 | -0.1850528 | 3.1729841  |
| S  | -7.0537690 | -0.0141700 | 0.0000000  |
| C  | -7.1987432 | -1.7839802 | 0.0000000  |
| N  | -7.2859111 | -2.9572388 | 0.0000000  |
| O  | -7.6569439 | 0.3759533  | -1.2481208 |
| O  | -7.6569439 | 0.3759533  | 1.2481208  |



**Complex 67** ( $X=SO_2CN$ ,  $Y=CN$ )

|    |            |            |            |
|----|------------|------------|------------|
| C  | 7.2151368  | -0.1735733 | 0.0000000  |
| C  | 6.5181409  | -0.1454326 | 1.2132589  |
| C  | 5.1275351  | -0.0865130 | 1.1980501  |
| C  | 4.3998522  | -0.0536402 | 0.0000000  |
| C  | 5.1275351  | -0.0865130 | -1.1980501 |
| C  | 6.5181409  | -0.1454326 | -1.2132589 |
| H  | 7.0676851  | -0.1711479 | 2.1480466  |
| H  | 4.6026088  | -0.0732355 | 2.1497432  |
| H  | 4.6026088  | -0.0732355 | -2.1497432 |
| H  | 7.0676851  | -0.1711479 | -2.1480466 |
| Sn | 2.2368671  | 0.0632363  | 0.0000000  |
| H  | 1.8191613  | -0.7191730 | 1.4305046  |
| H  | 1.8993050  | 1.7125117  | 0.0000000  |
| H  | 1.8191613  | -0.7191730 | -1.4305046 |
| C  | 8.6444023  | -0.2356718 | 0.0000000  |
| N  | 9.8164672  | -0.2865925 | 0.0000000  |
| Sn | -1.4560505 | 0.1663103  | 0.0000000  |
| C  | -2.8976579 | 0.2324826  | 1.5311997  |
| C  | -4.2560866 | 0.2597128  | 1.2712531  |
| H  | -4.9430131 | 0.2708107  | 2.1209038  |
| C  | -4.8669121 | 0.2867255  | 0.0000000  |
| C  | -4.2560866 | 0.2597128  | -1.2712531 |
| H  | -4.9430131 | 0.2708107  | -2.1209038 |
| C  | -2.8976579 | 0.2324826  | -1.5311997 |
| C  | -2.4792981 | 0.2562153  | -2.9844033 |
| H  | -3.2992586 | -0.0499171 | -3.6449189 |
| H  | -2.1728023 | 1.2626938  | -3.2879217 |
| H  | -1.6283288 | -0.4031700 | -3.1738501 |
| C  | -2.4792981 | 0.2562153  | 2.9844033  |
| H  | -2.1728023 | 1.2626938  | 3.2879217  |

|   |            |            |            |
|---|------------|------------|------------|
| H | -3.2992586 | -0.0499171 | 3.6449189  |
| H | -1.6283288 | -0.4031700 | 3.1738501  |
| S | -6.5785241 | 0.2069780  | 0.0000000  |
| C | -6.8743966 | -1.5435634 | 0.0000000  |
| N | -7.0633704 | -2.7047498 | 0.0000000  |
| O | -7.1450744 | 0.6476885  | -1.2483007 |
| O | -7.1450744 | 0.6476885  | 1.2483007  |

**Complex 68** ( $X=SO_2CN$ ,  $Y=P(CN)_2$ )

|    |            |            |            |
|----|------------|------------|------------|
| C  | 6.4635235  | -0.4252248 | 0.0000000  |
| C  | 5.7679578  | -0.3857144 | 1.2114675  |
| C  | 4.3773562  | -0.2855533 | 1.1964043  |
| C  | 3.6492746  | -0.2336797 | 0.0000000  |
| C  | 4.3773562  | -0.2855533 | -1.1964043 |
| C  | 5.7679578  | -0.3857144 | -1.2114675 |
| H  | 6.3010709  | -0.4144793 | 2.1575292  |
| H  | 3.8562641  | -0.2505929 | 2.1500130  |
| H  | 3.8562641  | -0.2505929 | -2.1500130 |
| H  | 6.3010709  | -0.4144793 | -2.1575292 |
| Sn | 1.4873996  | -0.0515649 | 0.0000000  |
| H  | 1.0575686  | -0.8241597 | 1.4321788  |
| H  | 1.2089408  | 1.6080218  | 0.0000000  |
| H  | 1.0575686  | -0.8241597 | -1.4321788 |
| P  | 8.2553662  | -0.7518905 | 0.0000000  |
| C  | 8.7715333  | 0.3185999  | 1.3289594  |
| N  | 9.1474960  | 0.9052306  | 2.2758103  |
| C  | 8.7715333  | 0.3185999  | -1.3289594 |
| N  | 9.1474960  | 0.9052306  | -2.2758103 |
| Sn | -2.1777761 | 0.1514468  | 0.0000000  |
| C  | -3.6169804 | 0.2367144  | 1.5316622  |
| C  | -4.9750405 | 0.2791330  | 1.2711940  |

|   |            |            |            |
|---|------------|------------|------------|
| H | -5.6618455 | 0.2983074  | 2.1207537  |
| C | -5.5852626 | 0.3124213  | 0.0000000  |
| C | -4.9750405 | 0.2791330  | -1.2711940 |
| H | -5.6618455 | 0.2983074  | -2.1207537 |
| C | -3.6169804 | 0.2367144  | -1.5316622 |
| C | -3.1991455 | 0.2589101  | -2.9850326 |
| H | -4.0206107 | -0.0444327 | -3.6449060 |
| H | -2.8898713 | 1.2645036  | -3.2887884 |
| H | -2.3505257 | -0.4032795 | -3.1751388 |
| C | -3.1991455 | 0.2589101  | 2.9850326  |
| H | -2.8898713 | 1.2645036  | 3.2887884  |
| H | -4.0206107 | -0.0444327 | 3.6449060  |
| H | -2.3505257 | -0.4032795 | 3.1751388  |
| S | -7.2980205 | 0.2494305  | 0.0000000  |
| C | -7.6084369 | -1.4983584 | 0.0000000  |
| N | -7.8053252 | -2.6582078 | 0.0000000  |
| O | -7.8600691 | 0.6956156  | -1.2482704 |
| O | -7.8600691 | 0.6956156  | 1.2482704  |

**Complex 69** ( $X=SO_2CN$ ,  $Y=SO_2CN$ )

|    |           |           |            |
|----|-----------|-----------|------------|
| C  | 6.4431854 | 0.1394902 | 0.0000000  |
| C  | 5.7672141 | 0.1467762 | 1.2204117  |
| C  | 4.3749342 | 0.1726908 | 1.1997841  |
| C  | 3.6482172 | 0.1867680 | 0.0000000  |
| C  | 4.3749342 | 0.1726908 | -1.1997841 |
| C  | 5.7672141 | 0.1467762 | -1.2204117 |
| H  | 6.3242125 | 0.1457706 | 2.1504836  |
| H  | 3.8479117 | 0.1780188 | 2.1503812  |
| H  | 3.8479117 | 0.1780188 | -2.1503812 |
| H  | 6.3242125 | 0.1457706 | -2.1504836 |
| Sn | 1.4716977 | 0.2772372 | 0.0000000  |

|    |            |            |            |
|----|------------|------------|------------|
| H  | 1.0953382  | -0.5127176 | 1.4373028  |
| H  | 1.1603391  | 1.9304862  | 0.0000000  |
| H  | 1.0953382  | -0.5127176 | -1.4373028 |
| S  | 8.1815451  | 0.0867127  | 0.0000000  |
| O  | 8.6977189  | 0.5524563  | 1.2540111  |
| O  | 8.6977189  | 0.5524563  | -1.2540111 |
| C  | 8.4480954  | -1.6535286 | 0.0000000  |
| N  | 8.6477745  | -2.8119895 | 0.0000000  |
| Sn | -2.1344897 | 0.3540871  | 0.0000000  |
| C  | -3.5707657 | 0.2931102  | 1.5329053  |
| C  | -4.9259228 | 0.1949291  | 1.2712823  |
| H  | -5.6112126 | 0.1405644  | 2.1205116  |
| C  | -5.5353389 | 0.1659346  | 0.0000000  |
| C  | -4.9259228 | 0.1949291  | -1.2712823 |
| H  | -5.6112126 | 0.1405644  | -2.1205116 |
| C  | -3.5707657 | 0.2931102  | -1.5329053 |
| C  | -3.1594309 | 0.3572347  | -2.9867507 |
| H  | -3.9264738 | -0.0741206 | -3.6405695 |
| H  | -3.0044714 | 1.3936333  | -3.3047154 |
| H  | -2.2215902 | -0.1734429 | -3.1693056 |
| C  | -3.1594309 | 0.3572347  | 2.9867507  |
| H  | -3.0044714 | 1.3936333  | 3.3047154  |
| H  | -3.9264738 | -0.0741206 | 3.6405695  |
| H  | -2.2215902 | -0.1734429 | 3.1693056  |
| S  | -7.2337535 | -0.0729418 | 0.0000000  |
| C  | -7.3603475 | -1.8430095 | 0.0000000  |
| N  | -7.4366912 | -3.0169416 | 0.0000000  |
| O  | -7.8375791 | 0.3139443  | -1.2483817 |
| O  | -7.8375791 | 0.3139443  | 1.2483817  |

**Complex 70** ( $X=SO_2CN$ ,  $Y=tBu$ )

|    |            |            |            |
|----|------------|------------|------------|
| C  | 5.1734155  | -0.0458834 | 0.0000000  |
| C  | 4.4432071  | -0.0216390 | 1.1947510  |
| C  | 3.0497860  | 0.0371532  | 1.1919710  |
| C  | 2.3164280  | 0.0718540  | 0.0000000  |
| C  | 3.0497860  | 0.0371532  | -1.1919710 |
| C  | 4.4432071  | -0.0216390 | -1.1947510 |
| H  | 4.9576870  | -0.0467727 | 2.1487244  |
| H  | 2.5323637  | 0.0517502  | 2.1484282  |
| H  | 2.5323637  | 0.0517502  | -2.1484282 |
| H  | 4.9576870  | -0.0467727 | -2.1487244 |
| Sn | 0.1718183  | 0.1991663  | 0.0000000  |
| H  | -0.3051065 | -0.5744577 | 1.4185124  |
| H  | -0.2110460 | 1.8404767  | 0.0000000  |
| H  | -0.3051065 | -0.5744577 | -1.4185124 |
| C  | 6.6904766  | -0.1726618 | 0.0000000  |
| C  | 7.0490128  | -1.6637492 | 0.0000000  |
| H  | 6.6382174  | -2.1585418 | -0.8836429 |
| H  | 8.1356260  | -1.7986867 | 0.0000000  |
| H  | 6.6382174  | -2.1585418 | 0.8836429  |
| C  | 7.3086219  | 0.4845324  | 1.2360000  |
| H  | 8.3991802  | 0.4428934  | 1.1674635  |
| H  | 7.0089794  | 1.5325937  | 1.3153757  |
| H  | 7.0219602  | -0.0230882 | 2.1582691  |
| C  | 7.3086219  | 0.4845324  | -1.2360000 |
| H  | 7.0219602  | -0.0230882 | -2.1582691 |
| H  | 7.0089794  | 1.5325937  | -1.3153757 |
| H  | 8.3991802  | 0.4428934  | -1.1674635 |
| Sn | -3.6902868 | 0.3088724  | 0.0000000  |
| C  | -5.1420002 | 0.3184352  | 1.5288939  |
| C  | -6.5003660 | 0.2855058  | 1.2712007  |

|   |            |            |            |
|---|------------|------------|------------|
| H | -7.1865103 | 0.2658297  | 2.1215752  |
| C | -7.1135609 | 0.2851391  | 0.0000000  |
| C | -6.5003660 | 0.2855058  | -1.2712007 |
| H | -7.1865103 | 0.2658297  | -2.1215752 |
| C | -5.1420002 | 0.3184352  | -1.5288939 |
| C | -4.7257338 | 0.3633230  | -2.9824996 |
| H | -5.5252203 | 0.0066990  | -3.6430714 |
| H | -4.4804511 | 1.3856659  | -3.2890755 |
| H | -3.8358626 | -0.2431972 | -3.1700570 |
| C | -4.7257338 | 0.3633230  | 2.9824996  |
| H | -4.4804511 | 1.3856659  | 3.2890755  |
| H | -5.5252203 | 0.0066990  | 3.6430714  |
| H | -3.8358626 | -0.2431972 | 3.1700570  |
| S | -8.8172683 | 0.1261675  | 0.0000000  |
| C | -9.0374855 | -1.6368087 | 0.0000000  |
| N | -9.1732194 | -2.8054883 | 0.0000000  |
| O | -9.4057073 | 0.5391160  | -1.2482000 |
| O | -9.4057073 | 0.5391160  | 1.2482000  |

**Complex 71** ( $X = SO_2CN$ ,  $Y = NH_2$ )

|    |           |            |            |
|----|-----------|------------|------------|
| C  | 7.1181237 | -0.2592757 | 0.0000000  |
| C  | 6.4041431 | -0.2234246 | 1.2002465  |
| C  | 5.0138415 | -0.1375032 | 1.1936432  |
| C  | 4.2819510 | -0.0905634 | 0.0000000  |
| C  | 5.0138415 | -0.1375032 | -1.1936432 |
| C  | 6.4041431 | -0.2234246 | -1.2002465 |
| H  | 6.9429407 | -0.2648636 | 2.1435130  |
| H  | 4.4965927 | -0.1140918 | 2.1496187  |
| H  | 4.4965927 | -0.1140918 | -2.1496187 |
| H  | 6.9429407 | -0.2648636 | -2.1435130 |
| Sn | 2.1448509 | 0.0780362  | 0.0000000  |

|    |            |            |            |
|----|------------|------------|------------|
| H  | 1.6407994  | -0.6842025 | 1.4158287  |
| H  | 1.7819121  | 1.7247060  | 0.0000000  |
| H  | 1.6407994  | -0.6842025 | -1.4158287 |
| N  | 8.5155516  | -0.4090077 | 0.0000000  |
| H  | 8.9510146  | -0.0274971 | -0.8293158 |
| H  | 8.9510146  | -0.0274971 | 0.8293158  |
| Sn | -1.7492576 | 0.2695055  | 0.0000000  |
| C  | -3.2023462 | 0.2945508  | 1.5286713  |
| C  | -4.5609115 | 0.2772540  | 1.2711717  |
| H  | -5.2471839 | 0.2661965  | 2.1215720  |
| C  | -5.1745426 | 0.2841447  | 0.0000000  |
| C  | -4.5609115 | 0.2772540  | -1.2711717 |
| H  | -5.2471839 | 0.2661965  | -2.1215720 |
| C  | -3.2023462 | 0.2945508  | -1.5286713 |
| C  | -2.7852112 | 0.3335218  | -2.9823110 |
| H  | -3.5965660 | 0.0070625  | -3.6441730 |
| H  | -2.5053302 | 1.3485175  | -3.2837221 |
| H  | -1.9162949 | -0.3017749 | -3.1734195 |
| C  | -2.7852112 | 0.3335218  | 2.9823110  |
| H  | -2.5053302 | 1.3485175  | 3.2837221  |
| H  | -3.5965660 | 0.0070625  | 3.6441730  |
| H  | -1.9162949 | -0.3017749 | 3.1734195  |
| S  | -6.8790974 | 0.1414972  | 0.0000000  |
| C  | -7.1167807 | -1.6194625 | 0.0000000  |
| N  | -7.2651692 | -2.7866259 | 0.0000000  |
| O  | -7.4642590 | 0.5597775  | -1.2480485 |
| O  | -7.4642590 | 0.5597775  | 1.2480485  |

**Complex 72** ( $X = SO_2CN$ ,  $Y = NMe_2$ )

|   |           |            |           |
|---|-----------|------------|-----------|
| C | 5.8230823 | -0.2622019 | 0.0000000 |
| C | 5.0911657 | -0.2301977 | 1.1997948 |

|    |            |            |            |
|----|------------|------------|------------|
| C  | 3.6989220  | -0.1870220 | 1.1887468  |
| C  | 2.9612736  | -0.1628782 | 0.0000000  |
| C  | 3.6989220  | -0.1870220 | -1.1887468 |
| C  | 5.0911657  | -0.2301977 | -1.1997948 |
| H  | 5.5988149  | -0.2437852 | 2.1553505  |
| H  | 3.1855884  | -0.1716026 | 2.1473986  |
| H  | 3.1855884  | -0.1716026 | -2.1473986 |
| H  | 5.5988149  | -0.2437852 | -2.1553505 |
| Sn | 0.8227854  | -0.0273526 | 0.0000000  |
| H  | 0.3306555  | -0.7983969 | 1.4156847  |
| H  | 0.4474768  | 1.6163046  | 0.0000000  |
| H  | 0.3306555  | -0.7983969 | -1.4156847 |
| N  | 7.2211428  | -0.3502768 | 0.0000000  |
| C  | 7.8909686  | 0.0697960  | 1.2148612  |
| H  | 7.6152148  | -0.5740176 | 2.0497505  |
| H  | 8.9667820  | -0.0248209 | 1.0705624  |
| H  | 7.6615381  | 1.1102550  | 1.4905861  |
| C  | 7.8909686  | 0.0697960  | -1.2148612 |
| H  | 8.9667820  | -0.0248209 | -1.0705624 |
| H  | 7.6152148  | -0.5740176 | -2.0497505 |
| H  | 7.6615381  | 1.1102550  | -1.4905861 |
| Sn | -3.0202035 | 0.1892534  | 0.0000000  |
| C  | -4.4702923 | 0.2508848  | 1.5290354  |
| C  | -5.8288320 | 0.2526865  | 1.2714584  |
| H  | -6.5154610 | 0.2542118  | 2.1215722  |
| C  | -6.4419211 | 0.2648313  | 0.0000000  |
| C  | -5.8288320 | 0.2526865  | -1.2714584 |
| H  | -6.5154610 | 0.2542118  | -2.1215722 |
| C  | -4.4702923 | 0.2508848  | -1.5290354 |
| C  | -4.0508556 | 0.2972342  | -2.9816103 |
| H  | -4.8600705 | -0.0270540 | -3.6470644 |



H -3.7731731 1.3147753 -3.2765661  
H -3.1796459 -0.3344531 -3.1742925  
C -4.0508556 0.2972342 2.9816103  
H -3.7731731 1.3147753 3.2765661  
H -4.8600705 -0.0270540 3.6470644  
H -3.1796459 -0.3344531 3.1742925  
S -8.1472791 0.1322385 0.0000000  
C -8.3901449 -1.6279770 0.0000000  
N -8.5375815 -2.7953574 0.0000000  
O -8.7306350 0.5532145 -1.2479922  
O -8.7306350 0.5532145 1.2479922

**Complex 73** (X= tBu, Y= H)

C 8.7481920 -0.0631359 0.0000000  
C 8.0464613 -0.0520044 1.2041691  
C 6.6512660 -0.0271314 1.1966675  
C 5.9217921 -0.0133433 0.0000000  
C 6.6512660 -0.0271314 -1.1966675  
C 8.0464613 -0.0520044 -1.2041691  
H 8.5853026 -0.0644477 2.1466456  
H 6.1242476 -0.0272870 2.1482351  
H 6.1242476 -0.0272870 -2.1482351  
H 8.5853026 -0.0644477 -2.1466456  
Sn 3.7530518 0.0430159 0.0000000  
H 3.3798811 -0.7517964 1.4376158  
H 3.3860078 1.6870785 0.0000000  
H 3.3798811 -0.7517964 -1.4376158  
H 9.8329695 -0.0854037 0.0000000  
Sn 0.1067964 0.0028787 0.0000000  
C -1.3541585 0.0335697 1.5048163  
C -2.7204604 0.0547316 1.2391906

|   |            |            |            |
|---|------------|------------|------------|
| H | -3.3626692 | 0.0357335  | 2.1248733  |
| C | -3.3908557 | 0.0816276  | 0.0000000  |
| C | -2.7204604 | 0.0547316  | -1.2391906 |
| H | -3.3626692 | 0.0357335  | -2.1248733 |
| C | -1.3541585 | 0.0335697  | -1.5048163 |
| C | -0.9635546 | 0.0442679  | -2.9686411 |
| H | -1.6293255 | -0.5906690 | -3.5690059 |
| H | -1.0223754 | 1.0562896  | -3.3884548 |
| H | 0.0607344  | -0.3060255 | -3.1225907 |
| C | -0.9635546 | 0.0442679  | 2.9686411  |
| H | -1.0223754 | 1.0562896  | 3.3884548  |
| H | -1.6293255 | -0.5906690 | 3.5690059  |
| H | 0.0607344  | -0.3060255 | 3.1225907  |
| C | -4.9237066 | 0.0061650  | 0.0000000  |
| C | -5.3405485 | -1.4704755 | 0.0000000  |
| H | -4.9394297 | -1.9749291 | 0.8830046  |
| H | -6.4327939 | -1.5778507 | 0.0000000  |
| H | -4.9394297 | -1.9749291 | -0.8830046 |
| C | -5.5454392 | 0.6854973  | 1.2264730  |
| H | -6.6360463 | 0.6992049  | 1.1250885  |
| H | -5.3121501 | 0.1635141  | 2.1549720  |
| H | -5.1927365 | 1.7162038  | 1.3192389  |
| C | -5.5454392 | 0.6854973  | -1.2264730 |
| H | -5.1927365 | 1.7162038  | -1.3192389 |
| H | -5.3121501 | 0.1635141  | -2.1549720 |
| H | -6.6360463 | 0.6992049  | -1.1250885 |

**Complex 74** ( $X = tBu$ ,  $Y = F$ )

|   |           |            |           |
|---|-----------|------------|-----------|
| C | 8.7030662 | -0.0364043 | 0.0000000 |
| C | 8.0330127 | -0.0353329 | 1.2116805 |
| C | 6.6369676 | -0.0283863 | 1.1953557 |

|    |            |            |            |
|----|------------|------------|------------|
| C  | 5.9053768  | -0.0229478 | 0.0000000  |
| C  | 6.6369676  | -0.0283863 | -1.1953557 |
| C  | 8.0330127  | -0.0353329 | -1.2116805 |
| H  | 8.5974178  | -0.0411848 | 2.1373526  |
| H  | 6.1145550  | -0.0352798 | 2.1489479  |
| H  | 6.1145550  | -0.0352798 | -2.1489479 |
| H  | 8.5974178  | -0.0411848 | -2.1373526 |
| Sn | 3.7318327  | 0.0275722  | 0.0000000  |
| H  | 3.3704396  | -0.7706371 | 1.4381597  |
| H  | 3.3782057  | 1.6738177  | 0.0000000  |
| H  | 3.3704396  | -0.7706371 | -1.4381597 |
| F  | 10.0582771 | -0.0439057 | 0.0000000  |
| Sn | 0.1038555  | 0.0111676  | 0.0000000  |
| C  | -1.3560956 | 0.0416203  | 1.5050945  |
| C  | -2.7225527 | 0.0545430  | 1.2390834  |
| H  | -3.3643469 | 0.0347585  | 2.1249066  |
| C  | -3.3934295 | 0.0755460  | 0.0000000  |
| C  | -2.7225527 | 0.0545430  | -1.2390834 |
| H  | -3.3643469 | 0.0347585  | -2.1249066 |
| C  | -1.3560956 | 0.0416203  | -1.5050945 |
| C  | -0.9642153 | 0.0647963  | -2.9682937 |
| H  | -1.6483593 | -0.5392874 | -3.5796004 |
| H  | -0.9914589 | 1.0849905  | -3.3708934 |
| H  | 0.0492758  | -0.3132976 | -3.1281706 |
| C  | -0.9642153 | 0.0647963  | 2.9682937  |
| H  | -0.9914589 | 1.0849905  | 3.3708934  |
| H  | -1.6483593 | -0.5392874 | 3.5796004  |
| H  | 0.0492758  | -0.3132976 | 3.1281706  |
| C  | -4.9259641 | -0.0096441 | 0.0000000  |
| C  | -5.3378539 | -1.4878061 | 0.0000000  |
| H  | -4.9364584 | -1.9912275 | 0.8834733  |

|   |            |            |            |
|---|------------|------------|------------|
| H | -6.4299708 | -1.5972253 | 0.0000000  |
| H | -4.9364584 | -1.9912275 | -0.8834733 |
| C | -5.5515389 | 0.6652946  | 1.2268532  |
| H | -6.6419832 | 0.6738544  | 1.1244106  |
| H | -5.3174734 | 0.1423768  | 2.1546560  |
| H | -5.2038840 | 1.6973136  | 1.3228611  |
| C | -5.5515389 | 0.6652946  | -1.2268532 |
| H | -5.2038840 | 1.6973136  | -1.3228611 |
| H | -5.3174734 | 0.1423768  | -2.1546560 |
| H | -6.6419832 | 0.6738544  | -1.1244106 |

**Complex 75** ( $X = tBu$ ,  $Y = CF_3$ )

|    |            |            |            |
|----|------------|------------|------------|
| C  | 7.9806923  | 0.0149343  | 0.0000000  |
| C  | 7.2863307  | 0.0110530  | 1.2086470  |
| C  | 5.8927604  | 0.0146756  | 1.1948409  |
| C  | 5.1601725  | 0.0175953  | 0.0000000  |
| C  | 5.8927604  | 0.0146756  | -1.1948409 |
| C  | 7.2863307  | 0.0110530  | -1.2086470 |
| H  | 7.8306521  | 0.0119947  | 2.1464422  |
| H  | 5.3683532  | 0.0087800  | 2.1475600  |
| H  | 5.3683532  | 0.0087800  | -2.1475600 |
| H  | 7.8306521  | 0.0119947  | -2.1464422 |
| Sn | 2.9736360  | 0.0563865  | 0.0000000  |
| H  | 2.6601503  | -0.7443381 | 1.4483203  |
| H  | 2.6498635  | 1.7087843  | 0.0000000  |
| H  | 2.6601503  | -0.7443381 | -1.4483203 |
| C  | 9.4723071  | -0.0451777 | 0.0000000  |
| F  | 9.9279780  | -1.3169338 | 0.0000000  |
| F  | 10.0114918 | 0.5475668  | 1.0805162  |
| F  | 10.0114918 | 0.5475668  | -1.0805162 |
| Sn | -0.5565857 | 0.0039581  | 0.0000000  |

|   |            |            |            |
|---|------------|------------|------------|
| C | -2.0105854 | 0.0272667  | 1.5067661  |
| C | -3.3766584 | 0.0397038  | 1.2391728  |
| H | -4.0189982 | 0.0192392  | 2.1243590  |
| C | -4.0468460 | 0.0628907  | 0.0000000  |
| C | -3.3766584 | 0.0397038  | -1.2391728 |
| H | -4.0189982 | 0.0192392  | -2.1243590 |
| C | -2.0105854 | 0.0272667  | -1.5067661 |
| C | -1.6200474 | 0.0440112  | -2.9702109 |
| H | -2.2813676 | -0.5939503 | -3.5717208 |
| H | -1.6858830 | 1.0565714  | -3.3872166 |
| H | -0.5938530 | -0.2994978 | -3.1257650 |
| C | -1.6200474 | 0.0440112  | 2.9702109  |
| H | -1.6858830 | 1.0565714  | 3.3872166  |
| H | -2.2813676 | -0.5939503 | 3.5717208  |
| H | -0.5938530 | -0.2994978 | 3.1257650  |
| C | -5.5796274 | -0.0174499 | 0.0000000  |
| C | -5.9949620 | -1.4945626 | 0.0000000  |
| H | -5.5949005 | -1.9990184 | 0.8835306  |
| H | -7.0871842 | -1.6015006 | 0.0000000  |
| H | -5.5949005 | -1.9990184 | -0.8835306 |
| C | -6.2025710 | 0.6601997  | 1.2266254  |
| H | -7.2929432 | 0.6721430  | 1.1249190  |
| H | -5.9695736 | 0.1377646  | 2.1549315  |
| H | -5.8520793 | 1.6913726  | 1.3210181  |
| C | -6.2025710 | 0.6601997  | -1.2266254 |
| H | -5.8520793 | 1.6913726  | -1.3210181 |
| H | -5.9695736 | 0.1377646  | -2.1549315 |
| H | -7.2929432 | 0.6721430  | -1.1249190 |

**Complex 76** (X= tBu, Y= CN)

|   |           |            |           |
|---|-----------|------------|-----------|
| C | 8.3733221 | -0.0177216 | 0.0000000 |
|---|-----------|------------|-----------|

|    |            |            |            |
|----|------------|------------|------------|
| C  | 7.6751409  | -0.0162089 | 1.2132276  |
| C  | 6.2826924  | -0.0100016 | 1.1955009  |
| C  | 5.5498030  | -0.0049631 | 0.0000000  |
| C  | 6.2826924  | -0.0100016 | -1.1955009 |
| C  | 7.6751409  | -0.0162089 | -1.2132276 |
| H  | 8.2261847  | -0.0206882 | 2.1479415  |
| H  | 5.7569733  | -0.0167107 | 2.1476941  |
| H  | 5.7569733  | -0.0167107 | -2.1476941 |
| H  | 8.2261847  | -0.0206882 | -2.1479415 |
| Sn | 3.3552418  | 0.0436118  | 0.0000000  |
| H  | 3.0640666  | -0.7562438 | 1.4544371  |
| H  | 3.0686342  | 1.7031157  | 0.0000000  |
| H  | 3.0640666  | -0.7562438 | -1.4544371 |
| C  | 9.8037197  | -0.0252534 | 0.0000000  |
| N  | 10.9769877 | -0.0320072 | 0.0000000  |
| Sn | -0.1085987 | 0.0197743  | 0.0000000  |
| C  | -1.5586951 | 0.0359611  | 1.5079246  |
| C  | -2.9247129 | 0.0385648  | 1.2395203  |
| H  | -3.5669302 | 0.0140180  | 2.1246705  |
| C  | -3.5946373 | 0.0564914  | 0.0000000  |
| C  | -2.9247129 | 0.0385648  | -1.2395203 |
| H  | -3.5669302 | 0.0140180  | -2.1246705 |
| C  | -1.5586951 | 0.0359611  | -1.5079246 |
| C  | -1.1655755 | 0.0644753  | -2.9701760 |
| H  | -1.8426693 | -0.5460956 | -3.5824534 |
| H  | -1.2038265 | 1.0851666  | -3.3701424 |
| H  | -0.1481664 | -0.3026326 | -3.1296670 |
| C  | -1.1655755 | 0.0644753  | 2.9701760  |
| H  | -1.2038265 | 1.0851666  | 3.3701424  |
| H  | -1.8426693 | -0.5460956 | 3.5824534  |
| H  | -0.1481664 | -0.3026326 | 3.1296670  |

|   |            |            |            |
|---|------------|------------|------------|
| C | -5.1273977 | -0.0253939 | 0.0000000  |
| C | -5.5445109 | -1.5018493 | 0.0000000  |
| H | -5.1458737 | -2.0073006 | 0.8835807  |
| H | -6.6369112 | -1.6061231 | 0.0000000  |
| H | -5.1458737 | -2.0073006 | -0.8835807 |
| C | -5.7498725 | 0.6528975  | 1.2265417  |
| H | -6.8399676 | 0.6676904  | 1.1231980  |
| H | -5.5196881 | 0.1291081  | 2.1547983  |
| H | -5.3969063 | 1.6831595  | 1.3218676  |
| C | -5.7498725 | 0.6528975  | -1.2265417 |
| H | -5.3969063 | 1.6831595  | -1.3218676 |
| H | -5.5196881 | 0.1291081  | -2.1547983 |
| H | -6.8399676 | 0.6676904  | -1.1231980 |

**Complex 77** ( $X = tBu$ ,  $Y = P(CN)_2$ )

|    |           |            |            |
|----|-----------|------------|------------|
| C  | 7.6497135 | -0.3773868 | 0.0000000  |
| C  | 6.9536298 | -0.3547584 | 1.2118018  |
| C  | 5.5601957 | -0.2912478 | 1.1937465  |
| C  | 4.8262739 | -0.2611423 | 0.0000000  |
| C  | 5.5601957 | -0.2912478 | -1.1937465 |
| C  | 6.9536298 | -0.3547584 | -1.2118018 |
| H  | 7.4886443 | -0.3708145 | 2.1574276  |
| H  | 5.0377012 | -0.2705908 | 2.1480029  |
| H  | 5.0377012 | -0.2705908 | -2.1480029 |
| H  | 7.4886443 | -0.3708145 | -2.1574276 |
| Sn | 2.6255630 | -0.1546824 | 0.0000000  |
| H  | 2.3470365 | -0.9513070 | 1.4599338  |
| H  | 2.3976237 | 1.5145714  | 0.0000000  |
| H  | 2.3470365 | -0.9513070 | -1.4599338 |
| P  | 9.4425889 | -0.6801834 | 0.0000000  |
| C  | 9.9555645 | 0.3939070  | 1.3287172  |

|    |            |            |            |
|----|------------|------------|------------|
| N  | 10.3340717 | 0.9794493  | 2.2752605  |
| C  | 9.9555645  | 0.3939070  | -1.3287172 |
| N  | 10.3340717 | 0.9794493  | -2.2752605 |
| Sn | -0.7798514 | -0.1192724 | 0.0000000  |
| C  | -2.2211843 | -0.0190004 | 1.5098584  |
| C  | -3.5841645 | 0.0660872  | 1.2398026  |
| H  | -4.2272457 | 0.0800102  | 2.1242735  |
| C  | -4.2510771 | 0.1245986  | 0.0000000  |
| C  | -3.5841645 | 0.0660872  | -1.2398026 |
| H  | -4.2272457 | 0.0800102  | -2.1242735 |
| C  | -2.2211843 | -0.0190004 | -1.5098584 |
| C  | -1.8277066 | -0.0216907 | -2.9722774 |
| H  | -2.5298516 | -0.6104485 | -3.5773861 |
| H  | -1.8241591 | 0.9951501  | -3.3835775 |
| H  | -0.8267688 | -0.4327318 | -3.1282395 |
| C  | -1.8277066 | -0.0216907 | 2.9722774  |
| H  | -1.8241591 | 0.9951501  | 3.3835775  |
| H  | -2.5298516 | -0.6104485 | 3.5773861  |
| H  | -0.8267688 | -0.4327318 | 3.1282395  |
| C  | -5.7859843 | 0.1299653  | 0.0000000  |
| C  | -6.3693494 | 0.8409755  | 1.2272413  |
| H  | -7.4566124 | 0.9192196  | 1.1229773  |
| H  | -6.1708862 | 0.3024070  | 2.1544245  |
| H  | -5.9572195 | 1.8486352  | 1.3259449  |
| C  | -6.3693494 | 0.8409755  | -1.2272413 |
| H  | -5.9572195 | 1.8486352  | -1.3259449 |
| H  | -6.1708862 | 0.3024070  | -2.1544245 |
| H  | -7.4566124 | 0.9192196  | -1.1229773 |
| C  | -6.2833823 | -1.3213911 | 0.0000000  |
| H  | -5.9125159 | -1.8478498 | 0.8833340  |
| H  | -7.3798271 | -1.3658797 | 0.0000000  |



H -5.9125159 -1.8478498 -0.8833340

**Complex 78** (X= tBu, Y= SO<sub>2</sub>CN)

C 7.6046283 0.2926432 0.0000000  
C 6.9288767 0.2537002 1.2208623  
C 5.5373969 0.1898662 1.1968495  
C 4.8062656 0.1585963 0.0000000  
C 5.5373969 0.1898662 -1.1968495  
C 6.9288767 0.2537002 -1.2208623  
H 7.4852932 0.2883558 2.1508841  
H 5.0096830 0.1598943 2.1477440  
H 5.0096830 0.1598943 -2.1477440  
H 7.4852932 0.2883558 -2.1508841  
Sn 2.5881680 0.1387405 0.0000000  
H 2.3903382 -0.6687013 1.4685429  
H 2.3310268 1.8051263 0.0000000  
H 2.3903382 -0.6687013 -1.4685429  
S 9.3376634 0.3601559 0.0000000  
O 9.8259528 0.8592204 1.2532403  
O 9.8259528 0.8592204 -1.2532403  
C 9.7368033 -1.3567755 0.0000000  
N 10.0321493 -2.4945883 0.0000000  
Sn -0.7329967 0.0384764 0.0000000  
C -2.1704226 0.0389631 1.5125060  
C -3.5355255 0.0237273 1.2401933  
H -4.1781342 -0.0095961 2.1241634  
C -4.2042014 0.0308429 0.0000000  
C -3.5355255 0.0237273 -1.2401933  
H -4.1781342 -0.0095961 -2.1241634  
C -2.1704226 0.0389631 -1.5125060  
C -1.7760763 0.0688217 -2.9740227

|   |            |            |            |
|---|------------|------------|------------|
| H | -2.4532801 | -0.5411788 | -3.5862936 |
| H | -1.8135793 | 1.0894469  | -3.3735815 |
| H | -0.7590680 | -0.2988974 | -3.1335985 |
| C | -1.7760763 | 0.0688217  | 2.9740227  |
| H | -1.8135793 | 1.0894469  | 3.3735815  |
| H | -2.4532801 | -0.5411788 | 3.5862936  |
| H | -0.7590680 | -0.2988974 | 3.1335985  |
| C | -5.7347790 | -0.0858392 | 0.0000000  |
| C | -6.1123025 | -1.5729128 | 0.0000000  |
| H | -5.7002338 | -2.0675470 | 0.8834841  |
| H | -7.2013582 | -1.7063110 | 0.0000000  |
| H | -5.7002338 | -2.0675470 | -0.8834841 |
| C | -6.3739252 | 0.5757489  | 1.2269484  |
| H | -7.4639503 | 0.5614969  | 1.1240967  |
| H | -6.1301636 | 0.0575652  | 2.1548659  |
| H | -6.0487156 | 1.6150363  | 1.3230744  |
| C | -6.3739252 | 0.5757489  | -1.2269484 |
| H | -6.0487156 | 1.6150363  | -1.3230744 |
| H | -6.1301636 | 0.0575652  | -2.1548659 |
| H | -7.4639503 | 0.5614969  | -1.1240967 |

**Complex 79** ( $X= tBu$ ,  $Y= tBu$ )

|   |           |           |            |
|---|-----------|-----------|------------|
| C | 6.4491687 | 0.0487927 | 0.0000000  |
| C | 5.7181974 | 0.0373608 | 1.1946076  |
| C | 4.3231142 | 0.0264279 | 1.1899434  |
| C | 3.5851425 | 0.0230613 | 0.0000000  |
| C | 4.3231142 | 0.0264279 | -1.1899434 |
| C | 5.7181974 | 0.0373608 | -1.1946076 |
| H | 6.2332634 | 0.0382513 | 2.1489121  |
| H | 3.8055058 | 0.0148618 | 2.1469072  |
| H | 3.8055058 | 0.0148618 | -2.1469072 |

|    |            |            |            |
|----|------------|------------|------------|
| H  | 6.2332634  | 0.0382513  | -2.1489121 |
| Sn | 1.4178038  | 0.0492573  | 0.0000000  |
| H  | 1.0423213  | -0.7516920 | 1.4332639  |
| H  | 1.0274726  | 1.6872817  | 0.0000000  |
| H  | 1.0423213  | -0.7516920 | -1.4332639 |
| C  | 7.9706222  | -0.0108433 | 0.0000000  |
| C  | 8.5607308  | 0.6721964  | 1.2355094  |
| H  | 8.2920025  | 0.1554281  | 2.1580236  |
| H  | 9.6524278  | 0.6736857  | 1.1692157  |
| H  | 8.2191927  | 1.7075151  | 1.3123025  |
| C  | 8.5607308  | 0.6721964  | -1.2355094 |
| H  | 9.6524278  | 0.6736857  | -1.1692157 |
| H  | 8.2920025  | 0.1554281  | -2.1580236 |
| H  | 8.2191927  | 1.7075151  | -1.3123025 |
| C  | 8.3933656  | -1.4849502 | 0.0000000  |
| H  | 8.0027307  | -1.9959769 | -0.8835030 |
| H  | 9.4848084  | -1.5754632 | 0.0000000  |
| H  | 8.0027307  | -1.9959769 | 0.8835030  |
| Sn | -2.2635167 | 0.0134777  | 0.0000000  |
| C  | -3.7266532 | 0.0441611  | 1.5042603  |
| C  | -5.0933084 | 0.0543955  | 1.2389790  |
| H  | -5.7347340 | 0.0344224  | 2.1251639  |
| C  | -5.7645945 | 0.0728478  | 0.0000000  |
| C  | -5.0933084 | 0.0543955  | -1.2389790 |
| H  | -5.7347340 | 0.0344224  | -2.1251639 |
| C  | -3.7266532 | 0.0441611  | -1.5042603 |
| C  | -3.3350299 | 0.0702139  | -2.9675886 |
| H  | -4.0192779 | -0.5321817 | -3.5808044 |
| H  | -3.3615222 | 1.0914344  | -3.3678199 |
| H  | -2.3215554 | -0.3077423 | -3.1282140 |
| C  | -3.3350299 | 0.0702139  | 2.9675886  |

|   |            |            |            |
|---|------------|------------|------------|
| H | -3.3615222 | 1.0914344  | 3.3678199  |
| H | -4.0192779 | -0.5321817 | 3.5808044  |
| H | -2.3215554 | -0.3077423 | 3.1282140  |
| C | -7.2966986 | -0.0194423 | 0.0000000  |
| C | -7.9259421 | 0.6521606  | 1.2267273  |
| H | -9.0164810 | 0.6543323  | 1.1243012  |
| H | -7.6881129 | 0.1308247  | 2.1544364  |
| H | -7.5840611 | 1.6861639  | 1.3220187  |
| C | -7.9259421 | 0.6521606  | -1.2267273 |
| H | -7.6881129 | 0.1308247  | -2.1544364 |
| H | -9.0164810 | 0.6543323  | -1.1243012 |
| H | -7.5840611 | 1.6861639  | -1.3220187 |
| C | -7.7013590 | -1.4996200 | 0.0000000  |
| H | -8.7929119 | -1.6145371 | 0.0000000  |
| H | -7.2974601 | -2.0011744 | -0.8833736 |
| H | -7.2974601 | -2.0011744 | 0.8833736  |

**Complex 80** (X= tBu, Y= NH<sub>2</sub>)

|    |            |            |            |
|----|------------|------------|------------|
| C  | 8.3151867  | -0.0125970 | 0.0000000  |
| C  | 7.6011580  | -0.0291759 | 1.2002080  |
| C  | 6.2077040  | -0.0468532 | 1.1919806  |
| C  | 5.4716602  | -0.0556192 | 0.0000000  |
| C  | 6.2077040  | -0.0468532 | -1.1919806 |
| C  | 7.6011580  | -0.0291759 | -1.2002080 |
| H  | 8.1420767  | -0.0290982 | 2.1436095  |
| H  | 5.6891175  | -0.0620787 | 2.1480316  |
| H  | 5.6891175  | -0.0620787 | -2.1480316 |
| H  | 8.1420767  | -0.0290982 | -2.1436095 |
| Sn | 3.3096955  | -0.0419754 | 0.0000000  |
| N  | 9.7232470  | -0.0597995 | 0.0000000  |
| H  | 10.1229090 | 0.3630580  | -0.8276979 |

|    |            |            |            |
|----|------------|------------|------------|
| H  | 10.1229090 | 0.3630580  | 0.8276979  |
| H  | 2.9322702  | -0.8425255 | 1.4332912  |
| H  | 2.8971361  | 1.5917551  | 0.0000000  |
| H  | 2.9322702  | -0.8425255 | -1.4332912 |
| Sn | -0.3718934 | -0.1198783 | 0.0000000  |
| C  | -1.8328584 | -0.0418140 | 1.5039379  |
| C  | -3.1978843 | 0.0249790  | 1.2391402  |
| H  | -3.8407125 | 0.0292896  | 2.1247011  |
| C  | -3.8671315 | 0.0741729  | 0.0000000  |
| C  | -3.1978843 | 0.0249790  | -1.2391402 |
| H  | -3.8407125 | 0.0292896  | -2.1247011 |
| C  | -1.8328584 | -0.0418140 | -1.5039379 |
| C  | -1.4431849 | -0.0504131 | -2.9683391 |
| H  | -2.0865618 | -0.7216033 | -3.5532752 |
| H  | -1.5366215 | 0.9490756  | -3.4117033 |
| H  | -0.4079573 | -0.3704642 | -3.1150118 |
| C  | -1.4431849 | -0.0504131 | 2.9683391  |
| H  | -1.5366215 | 0.9490756  | 3.4117033  |
| H  | -2.0865618 | -0.7216033 | 3.5532752  |
| H  | -0.4079573 | -0.3704642 | 3.1150118  |
| C  | -5.4015145 | 0.0458597  | 0.0000000  |
| C  | -6.0022661 | 0.7423933  | 1.2271558  |
| H  | -7.0916859 | 0.7920922  | 1.1250107  |
| H  | -5.7873492 | 0.2095066  | 2.1538092  |
| H  | -5.6157153 | 1.7603579  | 1.3247090  |
| C  | -6.0022661 | 0.7423933  | -1.2271558 |
| H  | -5.6157153 | 1.7603579  | -1.3247090 |
| H  | -5.7873492 | 0.2095066  | -2.1538092 |
| H  | -7.0916859 | 0.7920922  | -1.1250107 |
| C  | -5.8639987 | -1.4173405 | 0.0000000  |
| H  | -5.4790460 | -1.9340050 | 0.8832451  |

H -6.9591720 -1.4900201 0.0000000  
H -5.4790460 -1.9340050 -0.8832451

**Complex 81** (X= tBu, Y= NMe<sub>2</sub>)

C 7.1178086 -0.1694573 0.0000000  
C 6.3854807 -0.1601807 1.1994607  
C 4.9919280 -0.1618621 1.1868638  
C 4.2505883 -0.1611301 0.0000000  
C 4.9919280 -0.1618621 -1.1868638  
C 6.3854807 -0.1601807 -1.1994607  
H 6.8934024 -0.1582304 2.1552877  
H 4.4781442 -0.1633579 2.1459030  
H 4.4781442 -0.1633579 -2.1459030  
H 6.8934024 -0.1582304 -2.1552877  
Sn 2.0907471 -0.1090043 0.0000000  
N 8.5216258 -0.2146888 0.0000000  
C 9.1716968 0.2409318 -1.2127706  
H 10.2511196 0.1885975 -1.0715175  
H 8.9194983 -0.4071184 -2.0518494  
H 8.8995777 1.2734101 -1.4810165  
C 9.1716968 0.2409318 1.2127706  
H 8.8995777 1.2734101 1.4810165  
H 8.9194983 -0.4071184 2.0518494  
H 10.2511196 0.1885975 1.0715175  
H 1.6954469 -0.9027944 1.4322791  
H 1.7049193 1.5310985 0.0000000  
H 1.6954469 -0.9027944 -1.4322791  
Sn -1.6101780 -0.1144719 0.0000000  
C -3.0724615 -0.0413664 1.5039255  
C -4.4379027 0.0156193 1.2390793  
H -5.0802314 0.0152614 2.1249664

|   |            |            |            |
|---|------------|------------|------------|
| C | -5.1076583 | 0.0594387  | 0.0000000  |
| C | -4.4379027 | 0.0156193  | -1.2390793 |
| H | -5.0802314 | 0.0152614  | -2.1249664 |
| C | -3.0724615 | -0.0413664 | -1.5039255 |
| C | -2.6821573 | -0.0376644 | -2.9679743 |
| H | -3.3577283 | -0.6624023 | -3.5681686 |
| H | -2.7251048 | 0.9748783  | -3.3885816 |
| H | -1.6635706 | -0.4042026 | -3.1219482 |
| C | -2.6821573 | -0.0376644 | 2.9679743  |
| H | -2.7251048 | 0.9748783  | 3.3885816  |
| H | -3.3577283 | -0.6624023 | 3.5681686  |
| H | -1.6635706 | -0.4042026 | 3.1219482  |
| C | -6.6419140 | 0.0231968  | 0.0000000  |
| C | -7.2461730 | 0.7178717  | 1.2266242  |
| H | -8.3360476 | 0.7600006  | 1.1250854  |
| H | -7.0266972 | 0.1893274  | 2.1548044  |
| H | -6.8667304 | 1.7389044  | 1.3204655  |
| C | -7.2461730 | 0.7178717  | -1.2266242 |
| H | -7.0266972 | 0.1893274  | -2.1548044 |
| H | -8.3360476 | 0.7600006  | -1.1250854 |
| H | -6.8667304 | 1.7389044  | -1.3204655 |
| C | -7.0973295 | -1.4420222 | 0.0000000  |
| H | -6.7097445 | -1.9567478 | 0.8831420  |
| H | -8.1921001 | -1.5207099 | 0.0000000  |
| H | -6.7097445 | -1.9567478 | -0.8831420 |

**Complex 82** ( $X=NH_2$ ,  $Y=H$ )

|   |           |            |           |
|---|-----------|------------|-----------|
| C | 7.0724730 | -0.0633598 | 0.0000000 |
| C | 6.3705099 | -0.0563947 | 1.2040803 |
| C | 4.9750611 | -0.0383382 | 1.1963573 |
| C | 4.2446641 | -0.0272277 | 0.0000000 |

|    |            |            |            |
|----|------------|------------|------------|
| C  | 4.9750611  | -0.0383382 | -1.1963573 |
| C  | 6.3705099  | -0.0563947 | -1.2040803 |
| H  | 6.9095698  | -0.0663585 | 2.1465314  |
| H  | 4.4484318  | -0.0417248 | 2.1482028  |
| H  | 4.4484318  | -0.0417248 | -2.1482028 |
| H  | 6.9095698  | -0.0663585 | -2.1465314 |
| Sn | 2.0728183  | 0.0262472  | 0.0000000  |
| H  | 1.7059949  | -0.7686101 | 1.4389507  |
| H  | 1.7106120  | 1.6714615  | 0.0000000  |
| H  | 1.7059949  | -0.7686101 | -1.4389507 |
| H  | 8.1574420  | -0.0792221 | 0.0000000  |
| Sn | -1.5673289 | -0.0323186 | 0.0000000  |
| C  | -3.0192291 | -0.0246165 | 1.5163483  |
| C  | -4.3832120 | -0.0380576 | 1.2459613  |
| H  | -5.0654024 | -0.0627973 | 2.1095758  |
| C  | -5.0255450 | -0.0391453 | 0.0000000  |
| C  | -4.3832120 | -0.0380576 | -1.2459613 |
| H  | -5.0654024 | -0.0627973 | -2.1095758 |
| C  | -3.0192291 | -0.0246165 | -1.5163483 |
| C  | -2.6276339 | 0.0151258  | -2.9787038 |
| H  | -3.2684631 | -0.6369830 | -3.5880779 |
| H  | -2.7187621 | 1.0279864  | -3.3917008 |
| H  | -1.5917043 | -0.2993865 | -3.1330320 |
| C  | -2.6276339 | 0.0151258  | 2.9787038  |
| H  | -2.7187621 | 1.0279864  | 3.3917008  |
| H  | -3.2684631 | -0.6369830 | 3.5880779  |
| H  | -1.5917043 | -0.2993865 | 3.1330320  |
| N  | -6.4610666 | -0.1375502 | 0.0000000  |
| H  | -6.8371951 | 0.3307123  | 0.8182707  |
| H  | -6.8371951 | 0.3307123  | -0.8182707 |



**Complex 83** ( $X= NH_2$ ,  $Y= F$ )

|    |            |            |            |
|----|------------|------------|------------|
| C  | 7.0017448  | -0.0560217 | 0.0000000  |
| C  | 6.3316720  | -0.0535322 | 1.2116852  |
| C  | 4.9355309  | -0.0442011 | 1.1949864  |
| C  | 4.2034367  | -0.0379414 | 0.0000000  |
| C  | 4.9355309  | -0.0442011 | -1.1949864 |
| C  | 6.3316720  | -0.0535322 | -1.2116852 |
| H  | 6.8958980  | -0.0606235 | 2.1374972  |
| H  | 4.4128653  | -0.0502035 | 2.1485971  |
| H  | 4.4128653  | -0.0502035 | -2.1485971 |
| H  | 6.8958980  | -0.0606235 | -2.1374972 |
| Sn | 2.0257526  | 0.0099258  | 0.0000000  |
| H  | 1.6832374  | -0.7891141 | 1.4428423  |
| H  | 1.6845120  | 1.6591049  | 0.0000000  |
| H  | 1.6832374  | -0.7891141 | -1.4428423 |
| F  | 8.3573784  | -0.0664102 | 0.0000000  |
| Sn | -1.5561168 | -0.0267381 | 0.0000000  |
| C  | -3.0042559 | -0.0195468 | 1.5172469  |
| C  | -4.3680566 | -0.0371210 | 1.2461997  |
| H  | -5.0503249 | -0.0638483 | 2.1095432  |
| C  | -5.0101551 | -0.0402371 | 0.0000000  |
| C  | -4.3680566 | -0.0371210 | -1.2461997 |
| H  | -5.0503249 | -0.0638483 | -2.1095432 |
| C  | -3.0042559 | -0.0195468 | -1.5172469 |
| C  | -2.6119559 | 0.0241973  | -2.9791117 |
| H  | -3.2417850 | -0.6386988 | -3.5880379 |
| H  | -2.7190767 | 1.0350034  | -3.3930342 |
| H  | -1.5709876 | -0.2737015 | -3.1322106 |
| C  | -2.6119559 | 0.0241973  | 2.9791117  |
| H  | -2.7190767 | 1.0350034  | 3.3930342  |
| H  | -3.2417850 | -0.6386988 | 3.5880379  |

|   |            |            |            |
|---|------------|------------|------------|
| H | -1.5709876 | -0.2737015 | 3.1322106  |
| N | -6.4448547 | -0.1432306 | 0.0000000  |
| H | -6.8236100 | 0.3221644  | 0.8186347  |
| H | -6.8236100 | 0.3221644  | -0.8186347 |

**Complex 84** ( $X=NH_2$ ,  $Y=CF_3$ )

|    |            |            |            |
|----|------------|------------|------------|
| C  | 6.2543734  | 0.0013602  | 0.0000000  |
| C  | 5.5596870  | -0.0083973 | 1.2085773  |
| C  | 4.1659548  | -0.0183244 | 1.1942975  |
| C  | 3.4323576  | -0.0236343 | 0.0000000  |
| C  | 4.1659548  | -0.0183244 | -1.1942975 |
| C  | 5.5596870  | -0.0083973 | -1.2085773 |
| H  | 6.1039278  | -0.0006643 | 2.1465655  |
| H  | 3.6420281  | -0.0282222 | 2.1472365  |
| H  | 3.6420281  | -0.0282222 | -2.1472365 |
| H  | 6.1039278  | -0.0006643 | -2.1465655 |
| Sn | 1.2417172  | 0.0038015  | 0.0000000  |
| H  | 0.9396410  | -0.8025487 | 1.4485815  |
| H  | 0.9254535  | 1.6577694  | 0.0000000  |
| H  | 0.9396410  | -0.8025487 | -1.4485815 |
| C  | 7.7465807  | -0.0461825 | 0.0000000  |
| F  | 8.2138177  | -1.3139810 | 0.0000000  |
| F  | 8.2813588  | 0.5511375  | 1.0803501  |
| F  | 8.2813588  | 0.5511375  | -1.0803501 |
| Sn | -2.2653692 | -0.0206007 | 0.0000000  |
| C  | -3.7089794 | -0.0220633 | 1.5183901  |
| C  | -5.0724685 | -0.0463150 | 1.2461773  |
| H  | -5.7542575 | -0.0766864 | 2.1094918  |
| C  | -5.7145235 | -0.0525853 | 0.0000000  |
| C  | -5.0724685 | -0.0463150 | -1.2461773 |
| H  | -5.7542575 | -0.0766864 | -2.1094918 |

C -3.7089794 -0.0220633 -1.5183901  
C -3.3178712 0.0210127 -2.9804158  
H -3.9426766 -0.6494561 -3.5859213  
H -3.4342261 1.0295234 -3.3972515  
H -2.2748009 -0.2688574 -3.1336872  
C -3.3178712 0.0210127 2.9804158  
H -3.4342261 1.0295234 3.3972515  
H -3.9426766 -0.6494561 3.5859213  
H -2.2748009 -0.2688574 3.1336872  
N -7.1479244 -0.1631769 0.0000000  
H -7.5305588 0.2984762 0.8188212  
H -7.5305588 0.2984762 -0.8188212

**Complex 85** ( $X = NH_2$ ,  $Y = CN$ )

C 6.6645779 -0.0400015 0.0000000  
C 5.9662310 -0.0402417 1.2131715  
C 4.5737165 -0.0364130 1.1950975  
C 3.8401789 -0.0318170 0.0000000  
C 4.5737165 -0.0364130 -1.1950975  
C 5.9662310 -0.0402417 -1.2131715  
H 6.5171635 -0.0444365 2.1479381  
H 4.0478823 -0.0448328 2.1474126  
H 4.0478823 -0.0448328 -2.1474126  
H 6.5171635 -0.0444365 -2.1479381  
Sn 1.6398342 0.0184610 0.0000000  
H 1.3684585 -0.7824721 1.4587546  
H 1.3754473 1.6826413 0.0000000  
H 1.3684585 -0.7824721 -1.4587546  
C 8.0949529 -0.0428899 0.0000000  
N 9.2683005 -0.0444113 0.0000000  
Sn -1.7799214 -0.0147781 0.0000000

|   |            |            |            |
|---|------------|------------|------------|
| C | -3.2169000 | -0.0203169 | 1.5205287  |
| C | -4.5799550 | -0.0457729 | 1.2467745  |
| H | -5.2622358 | -0.0765316 | 2.1094531  |
| C | -5.2212714 | -0.0517386 | 0.0000000  |
| C | -4.5799550 | -0.0457729 | -1.2467745 |
| H | -5.2622358 | -0.0765316 | -2.1094531 |
| C | -3.2169000 | -0.0203169 | -1.5205287 |
| C | -2.8237660 | 0.0217542  | -2.9818700 |
| H | -3.4465476 | -0.6502639 | -3.5874662 |
| H | -2.9407432 | 1.0296696  | -3.3997098 |
| H | -1.7801969 | -0.2669777 | -3.1332488 |
| C | -2.8237660 | 0.0217542  | 2.9818700  |
| H | -2.9407432 | 1.0296696  | 3.3997098  |
| H | -3.4465476 | -0.6502639 | 3.5874662  |
| H | -1.7801969 | -0.2669777 | 3.1332488  |
| N | -6.6540078 | -0.1609343 | 0.0000000  |
| H | -7.0371528 | 0.2995696  | 0.8191191  |
| H | -7.0371528 | 0.2995696  | -0.8191191 |

**Complex 86** ( $X = NH_2$ ,  $Y = P(CN)_2$ )

|    |           |            |            |
|----|-----------|------------|------------|
| C  | 5.9065238 | -0.3800689 | 0.0000000  |
| C  | 5.2108583 | -0.3465605 | 1.2118394  |
| C  | 3.8185642 | -0.2591507 | 1.1932765  |
| C  | 3.0844825 | -0.2151326 | 0.0000000  |
| C  | 3.8185642 | -0.2591507 | -1.1932765 |
| C  | 5.2108583 | -0.3465605 | -1.2118394 |
| H  | 5.7453428 | -0.3717004 | 2.1577084  |
| H  | 3.2964171 | -0.2304536 | 2.1476057  |
| H  | 3.2964171 | -0.2304536 | -2.1476057 |
| H  | 5.7453428 | -0.3717004 | -2.1577084 |
| Sn | 0.8808248 | -0.0642108 | 0.0000000  |

|    |            |            |            |
|----|------------|------------|------------|
| H  | 0.6032466  | -0.8539771 | 1.4645444  |
| H  | 0.7027448  | 1.6116361  | 0.0000000  |
| H  | 0.6032466  | -0.8539771 | -1.4645444 |
| P  | 7.6950925  | -0.7066069 | 0.0000000  |
| C  | 8.2219291  | 0.3613043  | 1.3286070  |
| N  | 8.6074194  | 0.9424469  | 2.2750066  |
| C  | 8.2219291  | 0.3613043  | -1.3286070 |
| N  | 8.6074194  | 0.9424469  | -2.2750066 |
| Sn | -2.4933349 | -0.0008617 | 0.0000000  |
| C  | -3.9267293 | 0.0153010  | 1.5213102  |
| C  | -5.2897768 | 0.0166493  | 1.2469556  |
| H  | -5.9724795 | -0.0056287 | 2.1093980  |
| C  | -5.9306849 | 0.0268046  | 0.0000000  |
| C  | -5.2897768 | 0.0166493  | -1.2469556 |
| H  | -5.9724795 | -0.0056287 | -2.1093980 |
| C  | -3.9267293 | 0.0153010  | -1.5213102 |
| C  | -3.5311552 | 0.0414349  | -2.9818788 |
| H  | -4.1883533 | -0.5945406 | -3.5897660 |
| H  | -3.5937211 | 1.0552648  | -3.3963124 |
| H  | -2.5044638 | -0.3018917 | -3.1339391 |
| C  | -3.5311552 | 0.0414349  | 2.9818788  |
| H  | -3.5937211 | 1.0552648  | 3.3963124  |
| H  | -4.1883533 | -0.5945406 | 3.5897660  |
| H  | -2.5044638 | -0.3018917 | 3.1339391  |
| N  | -7.3651603 | -0.0491834 | 0.0000000  |
| H  | -7.7373427 | 0.4203140  | 0.8189962  |
| H  | -7.7373427 | 0.4203140  | -0.8189962 |

**Complex 87** ( $X = NH_2$ ,  $Y = SO_2CN$ )

|   |           |           |           |
|---|-----------|-----------|-----------|
| C | 5.8728625 | 0.2601765 | 0.0000000 |
| C | 5.1971599 | 0.2194340 | 1.2209559 |

|    |            |            |            |
|----|------------|------------|------------|
| C  | 3.8057291  | 0.1528234  | 1.1963675  |
| C  | 3.0739916  | 0.1206193  | 0.0000000  |
| C  | 3.8057291  | 0.1528234  | -1.1963675 |
| C  | 5.1971599  | 0.2194340  | -1.2209559 |
| H  | 5.7535641  | 0.2555554  | 2.1509853  |
| H  | 3.2778210  | 0.1212861  | 2.1473135  |
| H  | 3.2778210  | 0.1212861  | -2.1473135 |
| H  | 5.7535641  | 0.2555554  | -2.1509853 |
| Sn | 0.8496749  | 0.1015607  | 0.0000000  |
| H  | 0.6749714  | -0.7032851 | 1.4745253  |
| H  | 0.6144708  | 1.7724860  | 0.0000000  |
| H  | 0.6749714  | -0.7032851 | -1.4745253 |
| S  | 7.6050149  | 0.3329229  | 0.0000000  |
| O  | 8.0924956  | 0.8334246  | 1.2531384  |
| O  | 8.0924956  | 0.8334246  | -1.2531384 |
| C  | 8.0120032  | -1.3824823 | 0.0000000  |
| N  | 8.3144908  | -2.5184055 | 0.0000000  |
| Sn | -2.4297372 | -0.0194863 | 0.0000000  |
| C  | -3.8544386 | -0.0492614 | 1.5239150  |
| C  | -5.2161044 | -0.0992449 | 1.2472974  |
| H  | -5.8974990 | -0.1415287 | 2.1095608  |
| C  | -5.8564555 | -0.1177243 | 0.0000000  |
| C  | -5.2161044 | -0.0992449 | -1.2472974 |
| H  | -5.8974990 | -0.1415287 | -2.1095608 |
| C  | -3.8544386 | -0.0492614 | -1.5239150 |
| C  | -3.4606130 | 0.0031411  | -2.9842206 |
| H  | -4.0837381 | -0.6642749 | -3.5940092 |
| H  | -3.5780659 | 1.0141795  | -3.3935877 |
| H  | -2.4172360 | -0.2843930 | -3.1380997 |
| C  | -3.4606130 | 0.0031411  | 2.9842206  |
| H  | -3.5780659 | 1.0141795  | 3.3935877  |

|   |            |            |            |
|---|------------|------------|------------|
| H | -4.0837381 | -0.6642749 | 3.5940092  |
| H | -2.4172360 | -0.2843930 | 3.1380997  |
| N | -7.2850766 | -0.2545571 | 0.0000000  |
| H | -7.6796659 | 0.1945890  | 0.8197084  |
| H | -7.6796659 | 0.1945890  | -0.8197084 |

**Complex 88** (X= NH<sub>2</sub>, Y= tBu)

|    |            |            |            |
|----|------------|------------|------------|
| C  | 4.6766741  | 0.0253011  | 0.0000000  |
| C  | 3.9457755  | 0.0064770  | 1.1946200  |
| C  | 2.5507093  | -0.0127909 | 1.1896163  |
| C  | 1.8121890  | -0.0179947 | 0.0000000  |
| C  | 2.5507093  | -0.0127909 | -1.1896163 |
| C  | 3.9457755  | 0.0064770  | -1.1946200 |
| H  | 4.4608799  | 0.0102425  | 2.1489306  |
| H  | 2.0329980  | -0.0278668 | 2.1466037  |
| H  | 2.0329980  | -0.0278668 | -2.1466037 |
| H  | 4.4608799  | 0.0102425  | -2.1489306 |
| Sn | -0.3586001 | 0.0202868  | 0.0000000  |
| H  | -0.7249415 | -0.7774491 | 1.4376633  |
| H  | -0.7212324 | 1.6651071  | 0.0000000  |
| H  | -0.7249415 | -0.7774491 | -1.4376633 |
| C  | 6.1988271  | -0.0127036 | 0.0000000  |
| C  | 6.7780883  | 0.6799864  | 1.2353296  |
| H  | 6.5193307  | 0.1580353  | 2.1577722  |
| H  | 7.8695321  | 0.7009438  | 1.1677752  |
| H  | 6.4180342  | 1.7089543  | 1.3129588  |
| C  | 6.7780883  | 0.6799864  | -1.2353296 |
| H  | 7.8695321  | 0.7009438  | -1.1677752 |
| H  | 6.5193307  | 0.1580353  | -2.1577722 |
| H  | 6.4180342  | 1.7089543  | -1.3129588 |
| C  | 6.6460468  | -1.4794005 | 0.0000000  |

H 6.2642047 -1.9969464 -0.8835447  
H 7.7389218 -1.5512721 0.0000000  
H 6.2642047 -1.9969464 0.8835447  
Sn -3.9957366 -0.0069518 0.0000000  
C -5.4475469 -0.0140098 1.5162864  
C -6.8112843 -0.0446454 1.2460295  
H -7.4929465 -0.0772046 2.1098128  
C -7.4535766 -0.0553653 0.0000000  
C -6.8112843 -0.0446454 -1.2460295  
H -7.4929465 -0.0772046 -2.1098128  
C -5.4475469 -0.0140098 -1.5162864  
C -5.0559929 0.0350932 -2.9783056  
H -5.6897360 -0.6212744 -3.5904838  
H -5.1572576 1.0486805 -3.3870925  
H -4.0168770 -0.2682344 -3.1335387  
C -5.0559929 0.0350932 2.9783056  
H -5.1572576 1.0486805 3.3870925  
H -5.6897360 -0.6212744 3.5904838  
H -4.0168770 -0.2682344 3.1335387  
N -8.8873833 -0.1754642 0.0000000  
H -9.2710349 0.2862374 0.8185150  
H -9.2710349 0.2862374 -0.8185150

**Complex 89** ( $X= NH_2$ ,  $Y= NH_2$ )

C 6.5874216 -0.0274622 0.0000000  
C 5.8730986 -0.0337660 1.2000179  
C 4.4793768 -0.0275235 1.1916427  
C 3.7425675 -0.0220779 0.0000000  
C 4.4793768 -0.0275235 -1.1916427  
C 5.8730986 -0.0337660 -1.2000179  
H 6.4141428 -0.0434776 2.1433254



|    |            |            |            |
|----|------------|------------|------------|
| H  | 3.9608044  | -0.0340977 | 2.1479183  |
| H  | 3.9608044  | -0.0340977 | -2.1479183 |
| H  | 6.4141428  | -0.0434776 | -2.1433254 |
| Sn | 1.5782990  | 0.0437900  | 0.0000000  |
| H  | 1.1913095  | -0.7490245 | 1.4353070  |
| H  | 1.2172900  | 1.6894380  | 0.0000000  |
| H  | 1.1913095  | -0.7490245 | -1.4353070 |
| N  | 7.9954466  | -0.0934242 | 0.0000000  |
| H  | 8.3989664  | 0.3267443  | -0.8273641 |
| H  | 8.3989664  | 0.3267443  | 0.8273641  |
| Sn | -2.0802650 | 0.0519238  | 0.0000000  |
| C  | -3.5328647 | 0.0278854  | 1.5162604  |
| C  | -4.8962288 | -0.0164664 | 1.2462084  |
| H  | -5.5779955 | -0.0465747 | 2.1101221  |
| C  | -5.5378186 | -0.0402834 | 0.0000000  |
| C  | -4.8962288 | -0.0164664 | -1.2462084 |
| H  | -5.5779955 | -0.0465747 | -2.1101221 |
| C  | -3.5328647 | 0.0278854  | -1.5162604 |
| C  | -3.1396916 | 0.0726271  | -2.9779428 |
| H  | -3.7808220 | -0.5750340 | -3.5920470 |
| H  | -3.2286198 | 1.0875862  | -3.3858265 |
| H  | -2.1038003 | -0.2423383 | -3.1323498 |
| C  | -3.1396916 | 0.0726271  | 2.9779428  |
| H  | -3.2286198 | 1.0875862  | 3.3858265  |
| H  | -3.7808220 | -0.5750340 | 3.5920470  |
| H  | -2.1038003 | -0.2423383 | 3.1323498  |
| N  | -6.9767889 | -0.0368955 | 0.0000000  |
| H  | -7.3207518 | -0.5290445 | -0.8184346 |
| H  | -7.3207518 | -0.5290445 | 0.8184346  |

**Complex 90** (X= NH<sub>2</sub>, Y= NMe<sub>2</sub>)

|    |            |            |            |
|----|------------|------------|------------|
| C  | 5.3610128  | -0.1482409 | 0.0000000  |
| C  | 4.6282255  | -0.1389849 | 1.1991648  |
| C  | 3.2344140  | -0.1390596 | 1.1865369  |
| C  | 2.4920038  | -0.1369399 | 0.0000000  |
| C  | 3.2344140  | -0.1390596 | -1.1865369 |
| C  | 4.6282255  | -0.1389849 | -1.1991648 |
| H  | 5.1360064  | -0.1382567 | 2.1551314  |
| H  | 2.7213001  | -0.1397211 | 2.1459456  |
| H  | 2.7213001  | -0.1397211 | -2.1459456 |
| H  | 5.1360064  | -0.1382567 | -2.1551314 |
| Sn | 0.3296827  | -0.0710263 | 0.0000000  |
| H  | -0.0728535 | -0.8636045 | 1.4309407  |
| H  | -0.0407591 | 1.5722530  | 0.0000000  |
| H  | -0.0728535 | -0.8636045 | -1.4309407 |
| N  | 6.7653653  | -0.1940393 | 0.0000000  |
| C  | 7.4161320  | 0.2624621  | 1.2121808  |
| H  | 7.1635963  | -0.3838347 | 2.0524638  |
| H  | 8.4955165  | 0.2084189  | 1.0706823  |
| H  | 7.1459456  | 1.2958144  | 1.4790072  |
| C  | 7.4161320  | 0.2624621  | -1.2121808 |
| H  | 7.1635963  | -0.3838347 | -2.0524638 |
| H  | 7.1459456  | 1.2958144  | -1.4790072 |
| H  | 8.4955165  | 0.2084189  | -1.0706823 |
| Sn | -3.3845748 | -0.0361769 | 0.0000000  |
| C  | -4.8398452 | -0.0204472 | 1.5150455  |
| C  | -6.2042030 | -0.0269956 | 1.2456817  |
| H  | -6.8863902 | -0.0339221 | 2.1097790  |
| C  | -6.8469138 | -0.0341344 | 0.0000000  |
| C  | -6.2042030 | -0.0269956 | -1.2456817 |
| H  | -6.8863902 | -0.0339221 | -2.1097790 |
| C  | -4.8398452 | -0.0204472 | -1.5150455 |

|   |            |            |            |
|---|------------|------------|------------|
| C | -4.4482104 | 0.0155582  | -2.9774955 |
| H | -5.0740996 | -0.6543220 | -3.5833009 |
| H | -4.5610101 | 1.0235367  | -3.3971140 |
| H | -3.4057224 | -0.2781227 | -3.1286764 |
| C | -4.4482104 | 0.0155582  | 2.9774955  |
| H | -4.5610101 | 1.0235367  | 3.3971140  |
| H | -5.0740996 | -0.6543220 | 3.5833009  |
| H | -3.4057224 | -0.2781227 | 3.1286764  |
| N | -8.2855218 | 0.0117217  | 0.0000000  |
| H | -8.6439495 | -0.4702278 | -0.8183697 |
| H | -8.6439495 | -0.4702278 | 0.8183697  |

**Complex 91** ( $X = NMe_2$ ,  $Y = H$ )

|    |            |            |            |
|----|------------|------------|------------|
| C  | 8.2042535  | 0.0102864  | 0.0000000  |
| C  | 7.5026859  | -0.0137602 | 1.2040954  |
| C  | 6.1077760  | -0.0565942 | 1.1965185  |
| C  | 5.3777385  | -0.0771940 | 0.0000000  |
| C  | 6.1077760  | -0.0565942 | -1.1965185 |
| C  | 7.5026859  | -0.0137602 | -1.2040954 |
| H  | 8.0416156  | 0.0003435  | 2.1465796  |
| H  | 5.5818833  | -0.0821332 | 2.1483849  |
| H  | 5.5818833  | -0.0821332 | -2.1483849 |
| H  | 8.0416156  | 0.0003435  | -2.1465796 |
| Sn | 3.2068214  | -0.1031506 | 0.0000000  |
| H  | 2.8598011  | -0.9113818 | 1.4362313  |
| H  | 2.7853463  | 1.5273482  | 0.0000000  |
| H  | 2.8598011  | -0.9113818 | -1.4362313 |
| H  | 9.2888725  | 0.0426548  | 0.0000000  |
| Sn | -0.4502218 | -0.2379486 | 0.0000000  |
| C  | -1.9154082 | -0.1818053 | 1.4970146  |
| C  | -3.2830311 | -0.1515420 | 1.2411680  |

|   |            |            |            |
|---|------------|------------|------------|
| H | -3.9166501 | -0.1578760 | 2.1295444  |
| C | -3.9550583 | -0.1399362 | 0.0000000  |
| C | -3.2830311 | -0.1515420 | -1.2411680 |
| H | -3.9166501 | -0.1578760 | -2.1295444 |
| C | -1.9154082 | -0.1818053 | -1.4970146 |
| C | -1.5270552 | -0.1499255 | -2.9619636 |
| H | -2.1768063 | -0.7957331 | -3.5688713 |
| H | -1.6085302 | 0.8636892  | -3.3752011 |
| H | -0.4951802 | -0.4762552 | -3.1188867 |
| C | -1.5270552 | -0.1499255 | 2.9619636  |
| H | -1.6085302 | 0.8636892  | 3.3752011  |
| H | -2.1768063 | -0.7957331 | 3.5688713  |
| H | -0.4951802 | -0.4762552 | 3.1188867  |
| N | -5.3939786 | -0.1909021 | 0.0000000  |
| C | -6.0357978 | 0.3266129  | 1.1936525  |
| H | -7.1156619 | 0.3281328  | 1.0337233  |
| H | -5.8372258 | -0.3089565 | 2.0560839  |
| H | -5.7143019 | 1.3516056  | 1.4462370  |
| C | -6.0357978 | 0.3266129  | -1.1936525 |
| H | -5.8372258 | -0.3089565 | -2.0560839 |
| H | -7.1156619 | 0.3281328  | -1.0337233 |
| H | -5.7143019 | 1.3516056  | -1.4462370 |

**Complex 92** ( $X = NMe_2$ ,  $Y = F$ )

|   |           |            |            |
|---|-----------|------------|------------|
| C | 8.1236371 | -0.0112963 | 0.0000000  |
| C | 7.4537909 | -0.0270730 | 1.2115754  |
| C | 6.0578807 | -0.0551594 | 1.1950070  |
| C | 5.3259311 | -0.0679544 | 0.0000000  |
| C | 6.0578807 | -0.0551594 | -1.1950070 |
| C | 7.4537909 | -0.0270730 | -1.2115754 |
| H | 8.0181984 | -0.0197562 | 2.1372568  |

|    |            |            |            |
|----|------------|------------|------------|
| H  | 5.5355744  | -0.0759354 | 2.1485118  |
| H  | 5.5355744  | -0.0759354 | -2.1485118 |
| H  | 8.0181984  | -0.0197562 | -2.1372568 |
| Sn | 3.1486431  | -0.0868552 | 0.0000000  |
| H  | 2.8271774  | -0.8952367 | 1.4421909  |
| H  | 2.7454334  | 1.5483870  | 0.0000000  |
| H  | 2.8271774  | -0.8952367 | -1.4421909 |
| F  | 9.4790069  | 0.0152123  | 0.0000000  |
| Sn | -0.4382467 | -0.2391687 | 0.0000000  |
| C  | -1.8991702 | -0.1833520 | 1.4981377  |
| C  | -3.2665101 | -0.1496703 | 1.2414994  |
| H  | -3.9004990 | -0.1553792 | 2.1294220  |
| C  | -3.9380699 | -0.1360435 | 0.0000000  |
| C  | -3.2665101 | -0.1496703 | -1.2414994 |
| H  | -3.9004990 | -0.1553792 | -2.1294220 |
| C  | -1.8991702 | -0.1833520 | -1.4981377 |
| C  | -1.5085530 | -0.1574000 | -2.9625013 |
| H  | -2.1509627 | -0.8130229 | -3.5664215 |
| H  | -1.5976521 | 0.8525891  | -3.3828719 |
| H  | -0.4736483 | -0.4761243 | -3.1148205 |
| C  | -1.5085530 | -0.1574000 | 2.9625013  |
| H  | -1.5976521 | 0.8525891  | 3.3828719  |
| H  | -2.1509627 | -0.8130229 | 3.5664215  |
| H  | -0.4736483 | -0.4761243 | 3.1148205  |
| N  | -5.3766098 | -0.1822676 | 0.0000000  |
| C  | -6.0177782 | 0.3359454  | 1.1936347  |
| H  | -7.0977571 | 0.3359445  | 1.0349326  |
| H  | -5.8176993 | -0.2980406 | 2.0568170  |
| H  | -5.6972543 | 1.3616642  | 1.4441306  |
| C  | -6.0177782 | 0.3359454  | -1.1936347 |
| H  | -5.8176993 | -0.2980406 | -2.0568170 |

H -7.0977571 0.3359445 -1.0349326  
H -5.6972543 1.3616642 -1.4441306

**Complex 93** (X= NMe<sub>2</sub>, Y= CF<sub>3</sub>)

C 7.3849233 -0.0051608 0.0000000  
C 6.6908327 -0.0258116 1.2086475  
C 5.2975305 -0.0560811 1.1945757  
C 4.5646796 -0.0711882 0.0000000  
C 5.2975305 -0.0560811 -1.1945757  
C 6.6908327 -0.0258116 -1.2086475  
H 7.2352082 -0.0114578 2.1462965  
H 4.7732377 -0.0749232 2.1473257  
H 4.7732377 -0.0749232 -2.1473257  
H 7.2352082 -0.0114578 -2.1462965  
Sn 2.3744454 -0.0836617 0.0000000  
H 2.0919162 -0.8917717 1.4510019  
H 2.0265634 1.5641314 0.0000000  
H 2.0919162 -0.8917717 -1.4510019  
C 8.8773158 -0.0299695 0.0000000  
F 9.3635347 -1.2905573 0.0000000  
F 9.4026954 0.5752859 1.0805335  
F 9.4026954 0.5752859 -1.0805335  
Sn -1.1199908 -0.2087713 0.0000000  
C -2.5759523 -0.1665490 1.4994932  
C -3.9431598 -0.1427402 1.2413631  
H -4.5772028 -0.1539407 2.1290204  
C -4.6147385 -0.1325144 0.0000000  
C -3.9431598 -0.1427402 -1.2413631  
H -4.5772028 -0.1539407 -2.1290204  
C -2.5759523 -0.1665490 -1.4994932  
C -2.1880265 -0.1411683 -2.9643167

|   |            |            |            |
|---|------------|------------|------------|
| H | -2.8205677 | -0.8115101 | -3.5621301 |
| H | -2.2967281 | 0.8647674  | -3.3893844 |
| H | -1.1483213 | -0.4424140 | -3.1181986 |
| C | -2.1880265 | -0.1411683 | 2.9643167  |
| H | -2.2967281 | 0.8647674  | 3.3893844  |
| H | -2.8205677 | -0.8115101 | 3.5621301  |
| H | -1.1483213 | -0.4424140 | 3.1181986  |
| N | -6.0520271 | -0.1841476 | 0.0000000  |
| C | -6.6956576 | 0.3281617  | 1.1950903  |
| H | -7.7751091 | 0.3308487  | 1.0337982  |
| H | -6.4988936 | -0.3112575 | 2.0551475  |
| H | -6.3741548 | 1.3514811  | 1.4529516  |
| C | -6.6956576 | 0.3281617  | -1.1950903 |
| H | -6.3741548 | 1.3514811  | -1.4529516 |
| H | -6.4988936 | -0.3112575 | -2.0551475 |
| H | -7.7751091 | 0.3308487  | -1.0337982 |

**Complex 94** (X= NMe<sub>2</sub>, Y= CN)

|    |           |            |            |
|----|-----------|------------|------------|
| C  | 7.7898119 | -0.0240197 | 0.0000000  |
| C  | 7.0917935 | -0.0407720 | 1.2132777  |
| C  | 5.6995873 | -0.0698051 | 1.1952469  |
| C  | 4.9664956 | -0.0825341 | 0.0000000  |
| C  | 5.6995873 | -0.0698051 | -1.1952469 |
| C  | 7.0917935 | -0.0407720 | -1.2132777 |
| H  | 7.6428859 | -0.0315969 | 2.1479419  |
| H  | 5.1735856 | -0.0910212 | 2.1472364  |
| H  | 5.1735856 | -0.0910212 | -2.1472364 |
| H  | 7.6428859 | -0.0315969 | -2.1479419 |
| Sn | 2.7670069 | -0.0847058 | 0.0000000  |
| H  | 2.5116791 | -0.8913956 | 1.4580869  |
| H  | 2.4569719 | 1.5714418  | 0.0000000  |

H 2.5116791 -0.8913956 -1.4580869  
C 9.2198922 0.0055479 0.0000000  
N 10.3929718 0.0303470 0.0000000  
Sn -0.6551638 -0.1924099 0.0000000  
C -2.1057517 -0.1561360 1.5015069  
C -3.4727108 -0.1431698 1.2419550  
H -4.1068255 -0.1574031 2.1293837  
C -4.1437030 -0.1397595 0.0000000  
C -3.4727108 -0.1431698 -1.2419550  
H -4.1068255 -0.1574031 -2.1293837  
C -2.1057517 -0.1561360 -1.5015069  
C -1.7154435 -0.1194828 -2.9651617  
H -2.3617911 -0.7667587 -3.5734193  
H -1.8009279 0.8947045 -3.3753319  
H -0.6822474 -0.4409899 -3.1218689  
C -1.7154435 -0.1194828 2.9651617  
H -1.8009279 0.8947045 3.3753319  
H -2.3617911 -0.7667587 3.5734193  
H -0.6822474 -0.4409899 3.1218689  
N -5.5795535 -0.2043219 0.0000000  
C -6.2289035 0.2989459 1.1958078  
H -7.3080507 0.2924094 1.0331748  
H -6.0273913 -0.3417221 2.0539332  
H -5.9168529 1.3244004 1.4569517  
C -6.2289035 0.2989459 -1.1958078  
H -5.9168529 1.3244004 -1.4569517  
H -6.0273913 -0.3417221 -2.0539332  
H -7.3080507 0.2924094 -1.0331748

**Complex 95** ( $X = NMe_2$ ,  $Y = P(CN)_2$ )

C 7.0637834 -0.3972653 0.0000000



|    |            |            |            |
|----|------------|------------|------------|
| C  | 6.3675223  | -0.3790515 | 1.2118646  |
| C  | 4.9736006  | -0.3243854 | 1.1934148  |
| C  | 4.2389428  | -0.2990044 | 0.0000000  |
| C  | 4.9736006  | -0.3243854 | -1.1934148 |
| C  | 6.3675223  | -0.3790515 | -1.2118646 |
| H  | 6.9022772  | -0.3916218 | 2.1577966  |
| H  | 4.4508118  | -0.3072760 | 2.1476275  |
| H  | 4.4508118  | -0.3072760 | -2.1476275 |
| H  | 6.9022772  | -0.3916218 | -2.1577966 |
| Sn | 2.0341570  | -0.2089200 | 0.0000000  |
| H  | 1.7715851  | -1.0077808 | 1.4619321  |
| H  | 1.8040429  | 1.4599711  | 0.0000000  |
| H  | 1.7715851  | -1.0077808 | -1.4619321 |
| P  | 8.8586888  | -0.6871100 | 0.0000000  |
| C  | 9.3646896  | 0.3918085  | 1.3276629  |
| N  | 9.7411557  | 0.9826679  | 2.2716718  |
| C  | 9.3646896  | 0.3918085  | -1.3276629 |
| N  | 9.7411557  | 0.9826679  | -2.2716718 |
| Sn | -1.3561359 | -0.2062164 | 0.0000000  |
| C  | -2.8029524 | -0.1387433 | 1.5024492  |
| C  | -4.1691735 | -0.0954896 | 1.2420655  |
| H  | -4.8038133 | -0.0956368 | 2.1291226  |
| C  | -4.8398187 | -0.0771114 | 0.0000000  |
| C  | -4.1691735 | -0.0954896 | -1.2420655 |
| H  | -4.8038133 | -0.0956368 | -2.1291226 |
| C  | -2.8029524 | -0.1387433 | -1.5024492 |
| C  | -2.4110780 | -0.1094482 | -2.9657263 |
| H  | -3.0781818 | -0.7326609 | -3.5765533 |
| H  | -2.4629163 | 0.9085582  | -3.3717989 |
| H  | -1.3889884 | -0.4641450 | -3.1234669 |
| C  | -2.4110780 | -0.1094482 | 2.9657263  |

|   |            |            |            |
|---|------------|------------|------------|
| H | -2.4629163 | 0.9085582  | 3.3717989  |
| H | -3.0781818 | -0.7326609 | 3.5765533  |
| H | -1.3889884 | -0.4641450 | 3.1234669  |
| N | -6.2764725 | -0.1089516 | 0.0000000  |
| C | -6.9149920 | 0.4086070  | 1.1956955  |
| H | -7.9938203 | 0.4265848  | 1.0322422  |
| H | -6.7290239 | -0.2364931 | 2.0539824  |
| H | -6.5802961 | 1.4268099  | 1.4567247  |
| C | -6.9149920 | 0.4086070  | -1.1956955 |
| H | -6.7290239 | -0.2364931 | -2.0539824 |
| H | -7.9938203 | 0.4265848  | -1.0322422 |
| H | -6.5802961 | 1.4268099  | -1.4567247 |

**Complex 96** ( $X = NMe_2$ ,  $Y = SO_2CN$ )

|    |           |            |            |
|----|-----------|------------|------------|
| C  | 7.0065801 | 0.2531361  | 0.0000000  |
| C  | 6.3312020 | 0.2082389  | 1.2209422  |
| C  | 4.9405445 | 0.1279155  | 1.1965011  |
| C  | 4.2095690 | 0.0853594  | 0.0000000  |
| C  | 4.9405445 | 0.1279155  | -1.1965011 |
| C  | 6.3312020 | 0.2082389  | -1.2209422 |
| H  | 6.8872617 | 0.2491269  | 2.1509379  |
| H  | 4.4130304 | 0.0909229  | 2.1474091  |
| H  | 4.4130304 | 0.0909229  | -2.1474091 |
| H  | 6.8872617 | 0.2491269  | -2.1509379 |
| Sn | 1.9878469 | 0.0114239  | 0.0000000  |
| H  | 1.8303887 | -0.7988964 | 1.4733115  |
| H  | 1.7018419 | 1.6743608  | 0.0000000  |
| H  | 1.8303887 | -0.7988964 | -1.4733115 |
| S  | 8.7389141 | 0.3224474  | 0.0000000  |
| O  | 9.2281917 | 0.8210987  | 1.2531375  |
| O  | 9.2281917 | 0.8210987  | -1.2531375 |

|    |            |            |            |
|----|------------|------------|------------|
| C  | 9.1378896  | -1.3949256 | 0.0000000  |
| N  | 9.4333611  | -2.5326988 | 0.0000000  |
| Sn | -1.2920131 | -0.1896995 | 0.0000000  |
| C  | -2.7304460 | -0.1660604 | 1.5054102  |
| C  | -4.0967517 | -0.1656317 | 1.2425970  |
| H  | -4.7311930 | -0.1861960 | 2.1292247  |
| C  | -4.7669645 | -0.1675644 | 0.0000000  |
| C  | -4.0967517 | -0.1656317 | -1.2425970 |
| H  | -4.7311930 | -0.1861960 | -2.1292247 |
| C  | -2.7304460 | -0.1660604 | -1.5054102 |
| C  | -2.3385288 | -0.1293181 | -2.9682057 |
| H  | -2.9719725 | -0.7912231 | -3.5736098 |
| H  | -2.4425926 | 0.8810270  | -3.3829486 |
| H  | -1.2997218 | -0.4328460 | -3.1222412 |
| C  | -2.3385288 | -0.1293181 | 2.9682057  |
| H  | -2.4425926 | 0.8810270  | 3.3829486  |
| H  | -2.9719725 | -0.7912231 | 3.5736098  |
| H  | -1.2997218 | -0.4328460 | 3.1222412  |
| N  | -6.2010013 | -0.2435009 | 0.0000000  |
| C  | -6.8565122 | 0.2526097  | 1.1956608  |
| H  | -7.9352935 | 0.2322120  | 1.0330738  |
| H  | -6.6476402 | -0.3845595 | 2.0544200  |
| H  | -6.5579787 | 1.2824105  | 1.4545506  |
| C  | -6.8565122 | 0.2526097  | -1.1956608 |
| H  | -6.5579787 | 1.2824105  | -1.4545506 |
| H  | -6.6476402 | -0.3845595 | -2.0544200 |
| H  | -7.9352935 | 0.2322120  | -1.0330738 |

**Complex 97** ( $X = NMe_2$ ,  $Y = tBu$ )

|   |           |            |           |
|---|-----------|------------|-----------|
| C | 5.8276642 | 0.0250328  | 0.0000000 |
| C | 5.0971148 | -0.0012924 | 1.1946413 |

|    |            |            |            |
|----|------------|------------|------------|
| C  | 3.7025211  | -0.0409677 | 1.1897306  |
| C  | 2.9644069  | -0.0596260 | 0.0000000  |
| C  | 3.7025211  | -0.0409677 | -1.1897306 |
| C  | 5.0971148  | -0.0012924 | -1.1946413 |
| H  | 5.6120967  | 0.0100669  | 2.1489638  |
| H  | 3.1851641  | -0.0634023 | 2.1467191  |
| H  | 3.1851641  | -0.0634023 | -2.1467191 |
| H  | 5.6120967  | 0.0100669  | -2.1489638 |
| Sn | 0.7947409  | -0.0817781 | 0.0000000  |
| H  | 0.4471177  | -0.8908596 | 1.4357698  |
| H  | 0.3749512  | 1.5491166  | 0.0000000  |
| H  | 0.4471177  | -0.8908596 | -1.4357698 |
| C  | 7.3498940  | -0.0048663 | 0.0000000  |
| C  | 7.9270227  | 0.6895742  | 1.2351746  |
| H  | 7.6676630  | 0.1687235  | 2.1580369  |
| H  | 9.0185122  | 0.7109052  | 1.1686873  |
| H  | 7.5665585  | 1.7185419  | 1.3109755  |
| C  | 7.9270227  | 0.6895742  | -1.2351746 |
| H  | 9.0185122  | 0.7109052  | -1.1686873 |
| H  | 7.6676630  | 0.1687235  | -2.1580369 |
| H  | 7.5665585  | 1.7185419  | -1.3109755 |
| C  | 7.8012307  | -1.4704151 | 0.0000000  |
| H  | 7.4205066  | -1.9888791 | -0.8834895 |
| H  | 8.8942522  | -1.5395581 | 0.0000000  |
| H  | 7.4205066  | -1.9888791 | 0.8834895  |
| Sn | -2.8581913 | -0.2059203 | 0.0000000  |
| C  | -4.3235628 | -0.1578740 | 1.4968792  |
| C  | -5.6913842 | -0.1393334 | 1.2411907  |
| H  | -6.3247504 | -0.1495760 | 2.1296516  |
| C  | -6.3635060 | -0.1350149 | 0.0000000  |
| C  | -5.6913842 | -0.1393334 | -1.2411907 |

|   |            |            |            |
|---|------------|------------|------------|
| H | -6.3247504 | -0.1495760 | -2.1296516 |
| C | -4.3235628 | -0.1578740 | -1.4968792 |
| C | -3.9345474 | -0.1176289 | -2.9613349 |
| H | -4.5844787 | -0.7591297 | -3.5726188 |
| H | -4.0149222 | 0.8985997  | -3.3682284 |
| H | -2.9026608 | -0.4434075 | -3.1195247 |
| C | -3.9345474 | -0.1176289 | 2.9613349  |
| H | -4.0149222 | 0.8985997  | 3.3682284  |
| H | -4.5844787 | -0.7591297 | 3.5726188  |
| H | -2.9026608 | -0.4434075 | 3.1195247  |
| N | -7.8016081 | -0.2007687 | 0.0000000  |
| C | -8.4490229 | 0.3085442  | 1.1940688  |
| H | -9.5288110 | 0.2991891  | 1.0338840  |
| H | -8.2440102 | -0.3262793 | 2.0556528  |
| H | -8.1380440 | 1.3363841  | 1.4482413  |
| C | -8.4490229 | 0.3085442  | -1.1940688 |
| H | -8.1380440 | 1.3363841  | -1.4482413 |
| H | -8.2440102 | -0.3262793 | -2.0556528 |
| H | -9.5288110 | 0.2991891  | -1.0338840 |

**Complex 98** ( $X = NMe_2$ ,  $Y = NH_2$ )

|   |           |            |            |
|---|-----------|------------|------------|
| C | 7.7502467 | -0.0749588 | 0.0000000  |
| C | 7.0359214 | -0.0546204 | 1.1998828  |
| C | 5.6434255 | 0.0033758  | 1.1917747  |
| C | 4.9073448 | 0.0359656  | 0.0000000  |
| C | 5.6434255 | 0.0033758  | -1.1917747 |
| C | 7.0359214 | -0.0546204 | -1.1998828 |
| H | 7.5760323 | -0.0844445 | 2.1432122  |
| H | 5.1254573 | 0.0160372  | 2.1481565  |
| H | 5.1254573 | 0.0160372  | -2.1481565 |
| H | 7.5760323 | -0.0844445 | -2.1432122 |

|    |            |            |            |
|----|------------|------------|------------|
| Sn | 2.7492217  | 0.1818763  | 0.0000000  |
| H  | 2.3193428  | -0.5944655 | 1.4319500  |
| H  | 2.4390307  | 1.8378132  | 0.0000000  |
| H  | 2.3193428  | -0.5944655 | -1.4319500 |
| N  | 9.1543220  | -0.1941663 | 0.0000000  |
| H  | 9.5746439  | 0.2086516  | -0.8275642 |
| H  | 9.5746439  | 0.2086516  | 0.8275642  |
| Sn | -0.9609364 | 0.3157354  | 0.0000000  |
| C  | -2.4282337 | 0.2401856  | 1.4960096  |
| C  | -3.7931765 | 0.1453785  | 1.2409548  |
| H  | -4.4244299 | 0.0999766  | 2.1298161  |
| C  | -4.4645293 | 0.1054378  | 0.0000000  |
| C  | -3.7931765 | 0.1453785  | -1.2409548 |
| H  | -4.4244299 | 0.0999766  | -2.1298161 |
| C  | -2.4282337 | 0.2401856  | -1.4960096 |
| C  | -2.0427682 | 0.2995979  | -2.9609755 |
| H  | -2.6609412 | -0.3729058 | -3.5720010 |
| H  | -2.1723761 | 1.3106191  | -3.3679705 |
| H  | -0.9963585 | 0.0247589  | -3.1206907 |
| C  | -2.0427682 | 0.2995979  | 2.9609755  |
| H  | -2.1723761 | 1.3106191  | 3.3679705  |
| H  | -2.6609412 | -0.3729058 | 3.5720010  |
| H  | -0.9963585 | 0.0247589  | 3.1206907  |
| N  | -5.9038387 | 0.0643713  | 0.0000000  |
| C  | -6.5138840 | -0.4890368 | 1.1938195  |
| H  | -6.3522375 | 0.1576742  | 2.0557131  |
| H  | -7.5918901 | -0.5532671 | 1.0341348  |
| H  | -6.1339581 | -1.4935524 | 1.4472710  |
| C  | -6.5138840 | -0.4890368 | -1.1938195 |
| H  | -7.5918901 | -0.5532671 | -1.0341348 |
| H  | -6.3522375 | 0.1576742  | -2.0557131 |

H -6.1339581 -1.4935524 -1.4472710

**Complex 99** (X= NMe<sub>2</sub>, Y= NMe<sub>2</sub>)

C 6.5136644 -0.1431908 0.0000000  
C 5.7819873 -0.1041311 1.1993026  
C 4.3892556 -0.0507298 1.1866590  
C 3.6477262 -0.0211004 0.0000000  
C 4.3892556 -0.0507298 -1.1866590  
C 5.7819873 -0.1041311 -1.1993026  
H 6.2895699 -0.1225478 2.1552234  
H 3.8762687 -0.0319953 2.1459282  
H 3.8762687 -0.0319953 -2.1459282  
H 6.2895699 -0.1225478 -2.1552234  
Sn 1.4894160 0.1105998 0.0000000  
H 1.0640006 -0.6691882 1.4312714  
H 1.1630165 1.7632912 0.0000000  
H 1.0640006 -0.6691882 -1.4312714  
N 7.9144766 -0.2470679 0.0000000  
C 8.5845249 0.1783939 1.2127681  
H 8.3053691 -0.4591801 2.0513767  
H 9.6605360 0.0792154 1.0702522  
H 8.3584206 1.2214576 1.4827909  
C 8.5845249 0.1783939 -1.2127681  
H 8.3053691 -0.4591801 -2.0513767  
H 8.3584206 1.2214576 -1.4827909  
H 9.6605360 0.0792154 -1.0702522  
Sn -2.2261060 0.2163587 0.0000000  
C -3.6946946 0.1733195 1.4957856  
C -5.0615679 0.1105743 1.2409987  
H -5.6941395 0.0822792 2.1297163  
C -5.7335607 0.0852513 0.0000000

|   |            |            |            |
|---|------------|------------|------------|
| C | -5.0615679 | 0.1105743  | -1.2409987 |
| H | -5.6941395 | 0.0822792  | -2.1297163 |
| C | -3.6946946 | 0.1733195  | -1.4957856 |
| C | -3.3083622 | 0.2219943  | -2.9609864 |
| H | -3.9137937 | -0.4687622 | -3.5642773 |
| H | -3.4554805 | 1.2256529  | -3.3804045 |
| H | -2.2571227 | -0.0370305 | -3.1152634 |
| C | -3.3083622 | 0.2219943  | 2.9609864  |
| H | -3.4554805 | 1.2256529  | 3.3804045  |
| H | -3.9137937 | -0.4687622 | 3.5642773  |
| H | -2.2571227 | -0.0370305 | 3.1152634  |
| N | -7.1734820 | 0.0752801  | 0.0000000  |
| C | -7.7945684 | -0.4647519 | 1.1943329  |
| H | -7.6224540 | 0.1813749  | 2.0547227  |
| H | -8.8734045 | -0.5108136 | 1.0337097  |
| H | -7.4319203 | -1.4748425 | 1.4509585  |
| C | -7.7945684 | -0.4647519 | -1.1943329 |
| H | -8.8734045 | -0.5108136 | -1.0337097 |
| H | -7.6224540 | 0.1813749  | -2.0547227 |
| H | -7.4319203 | -1.4748425 | -1.4509585 |
